# Supplementary material for: Identification of a Potential Alternative Splicing Prognostic Signature Associated With Immune Infiltrates of Ovarian Cancer
Source: Research Square preprint supplement (doi:10.21203/rs.3.rs-500677/v1), 2021-05-20
Supplement: Supplementary file 1 [file a0f943e9efb289b8396302d7.docx]

| id | z | HR | HR.95L | HR.95H | pvalue |
| --- | --- | --- | --- | --- | --- |
| RFTN1|63647|AP | -3.4228 | 7.20E-06 | 8.18E-09 | 0.006342 | 0.00062 |
| ZNF692|10558|AD | -3.31296 | 0.004877 | 0.000209 | 0.113722 | 0.000923 |
| FLT3LG|50942|AP | 3.259033 | 7.208535 | 2.19757 | 23.64566 | 0.001118 |
| BCLAF1|77906|ES | 3.185595 | 14.86051 | 2.824426 | 78.18749 | 0.001445 |
| KANK1|85711|AP | -3.06621 | 0.30424 | 0.142194 | 0.650956 | 0.002168 |
| HK2|54143|AP | -3.05997 | 0.002277 | 4.62E-05 | 0.112197 | 0.002214 |
| NDUFA3|95376|ES | 3.048421 | 5.429611 | 1.829589 | 16.11327 | 0.0023 |
| LRTOMT|17527|AT | 3.044989 | 12.37772 | 2.450993 | 62.50852 | 0.002327 |
| LRTOMT|17526|AT | -3.04499 | 0.08079 | 0.015998 | 0.407998 | 0.002327 |
| DMKN|49184|ES | 3.034824 | 2.53259 | 1.389738 | 4.61527 | 0.002407 |
| ZNF98|48807|AT | 3.028374 | 2.585346 | 1.398095 | 4.780801 | 0.002459 |
| ZNF98|48808|AT | -2.99678 | 0.390629 | 0.211237 | 0.722371 | 0.002729 |
| SLC10A7|70775|ES | -2.99596 | 0.323053 | 0.154255 | 0.676563 | 0.002736 |
| SP140|57870|AT | -2.95287 | 0.238901 | 0.092366 | 0.61791 | 0.003148 |
| TSGA10|54657|AP | 2.947978 | 2.955292 | 1.437876 | 6.07406 | 0.003199 |
| TRDMT1|10925|ES | 2.898512 | 3.229025 | 1.461635 | 7.133519 | 0.003749 |
| PBRM1|65236|ES | -2.8833 | 0.208847 | 0.072023 | 0.605597 | 0.003935 |
| MFAP5|20197|ES | -2.76973 | 0.039285 | 0.003976 | 0.388154 | 0.00561 |
| SLAIN2|69214|ES | 2.767303 | 5.454143 | 1.640341 | 18.13505 | 0.005652 |
| LEF1|70286|AP | 2.75898 | 55.38988 | 3.19821 | 959.2988 | 0.005798 |
| TBXAS1|81965|AP | -2.73294 | 0.500879 | 0.305065 | 0.822382 | 0.006277 |
| WDR90|32931|AA | 2.731233 | 15.03227 | 2.149703 | 105.1165 | 0.00631 |
| LIMS2|55227|AP | 2.706016 | 2.237487 | 1.248618 | 4.009513 | 0.00681 |
| COMTD1|186612|ES | -2.66253 | 0.036626 | 0.00321 | 0.417855 | 0.007756 |
| ARHGEF1|50101|ES | -2.66065 | 0.190501 | 0.056161 | 0.646188 | 0.007799 |
| PAM|72886|ES | 2.644104 | 10.34182 | 1.830285 | 58.43533 | 0.008191 |
| DCAF11|26847|ES | 2.594835 | 3.886627 | 1.393956 | 10.83669 | 0.009464 |
| SMIM7|48188|RI | -2.57611 | 0.003786 | 5.44E-05 | 0.263492 | 0.009992 |
| FOXRED1|19375|ES | 2.57259 | 61.98007 | 2.671772 | 1437.821 | 0.010094 |
| B4GALT3|8588|AA | -2.56708 | 0.209381 | 0.063456 | 0.690877 | 0.010256 |
| KHDRBS1|1542|ES | 2.550403 | 1341.79 | 5.297665 | 339847.7 | 0.01076 |
| RPS6KA3|88667|AP | -2.54415 | 0.317403 | 0.131118 | 0.768351 | 0.010954 |
| FAM49B|85138|AP | -2.53893 | 0.350808 | 0.156271 | 0.787517 | 0.011119 |
| REPIN1|82247|ES | -2.5257 | 0.246408 | 0.083095 | 0.730693 | 0.011547 |
| MTMR12|71645|ES | 2.51636 | 7143131 | 32.76969 | 1.56E+12 | 0.011857 |
| HEBP2|77939|AD | 2.510584 | 274533.8 | 15.588 | 4.84E+09 | 0.012053 |
| DBNDD1|38197|AP | 2.50515 | 5.575912 | 1.453509 | 21.39016 | 0.01224 |
| ALDH3B1|17274|ES | -2.49489 | 0.160383 | 0.038083 | 0.675429 | 0.0126 |
| SP100|57907|ES | 2.494668 | 9.139307 | 1.606797 | 51.98349 | 0.012607 |
| AP1S2|88569|AT | -2.4939 | 0.415873 | 0.20869 | 0.828744 | 0.012635 |
| AP1S2|88571|AT | 2.493887 | 2.40457 | 1.206639 | 4.791787 | 0.012635 |
| QKI|78408|AA | -2.47983 | 0.462627 | 0.251561 | 0.850785 | 0.013145 |
| NFKB2|12948|AA | -2.46644 | 0.042721 | 0.003487 | 0.523367 | 0.013646 |
| POLM|79449|AD | 2.458404 | 4.69812 | 1.36846 | 16.12932 | 0.013956 |
| FYB|71858|ES | 2.457447 | 5.085931 | 1.389943 | 18.6099 | 0.013993 |
| PIGV|1301|RI | -2.44593 | 0.000383 | 6.99E-07 | 0.209447 | 0.014448 |
| PRKCSH|47709|AA | -2.43982 | 0.07671 | 0.009751 | 0.603499 | 0.014695 |
| TXNDC11|34030|ES | -2.42771 | 0.106102 | 0.017345 | 0.649062 | 0.015194 |
| RCOR3|9709|ES | 2.417532 | 5.780029 | 1.393834 | 23.96895 | 0.015626 |
| MRPL55|10169|ES | 2.414716 | 81.97679 | 2.292958 | 2930.797 | 0.015747 |
| SETD5|63098|ES | -2.40702 | 0.452024 | 0.236793 | 0.862886 | 0.016083 |
| TNFAIP8|73067|AP | 2.405034 | 5.185458 | 1.356054 | 19.82884 | 0.016171 |
| C9orf85|86580|ES | -2.38911 | 0.106767 | 0.017037 | 0.669086 | 0.016889 |
| SPAG9|42493|AP | -2.38388 | 0.44183 | 0.225732 | 0.864804 | 0.017131 |
| CTNND1|15986|ES | -2.38273 | 0.312772 | 0.120231 | 0.813652 | 0.017185 |
| TTC8|28742|ES | 2.38157 | 4.389365 | 1.299342 | 14.82791 | 0.017239 |
| MRPL55|10170|AA | 2.377675 | 10.03442 | 1.499487 | 67.14937 | 0.017422 |
| NNT|71963|AP | -2.37659 | 0.340882 | 0.140328 | 0.828063 | 0.017474 |
| FOXO3|77152|AP | -2.37473 | 0.31153 | 0.118977 | 0.81571 | 0.017562 |
| PBRM1|65237|ES | -2.36912 | 0.14678 | 0.030009 | 0.717928 | 0.017831 |
| TBRG1|19225|ES | -2.3691 | 0.315892 | 0.12176 | 0.819544 | 0.017832 |
| NNT|71964|AP | 2.361086 | 2.890627 | 1.197616 | 6.976969 | 0.018221 |
| SLMAP|65397|ES | -2.35967 | 0.011557 | 0.000284 | 0.46975 | 0.018291 |
| LYNX1|85363|AP | -2.35766 | 0.501218 | 0.282263 | 0.890019 | 0.01839 |
| CD99|88410|ES | -2.35623 | 7.95E-07 | 6.71E-12 | 0.094234 | 0.018462 |
| SPAG9|42492|AP | 2.356167 | 2.238637 | 1.145122 | 4.376386 | 0.018465 |
| FTH1|16335|ES | -2.34085 | 0.11059 | 0.0175 | 0.698875 | 0.01924 |
| BBS4|31578|ES | -2.33725 | 0.075776 | 0.008708 | 0.659372 | 0.019426 |
| BTBD3|58696|ES | 2.336657 | 10.30262 | 1.456457 | 72.87815 | 0.019457 |
| PLEKHG2|49822|AP | -2.33486 | 0.283159 | 0.098185 | 0.816611 | 0.019551 |
| PLEKHG2|49821|AP | 2.334822 | 3.531512 | 1.224547 | 10.18464 | 0.019553 |
| FBXO4|71891|ES | -2.33066 | 0.019197 | 0.000691 | 0.533268 | 0.019771 |
| HDGF|8318|AP | 2.326444 | 1965.41 | 3.302254 | 1169757 | 0.019995 |
| DLG1|68295|ES | 2.322496 | 2.4176 | 1.147743 | 5.09242 | 0.020206 |
| LENG8|51902|AD | 2.306389 | 7.418994 | 1.351226 | 40.73448 | 0.021089 |
| OAZ3|7652|AP | 2.302374 | 3.002391 | 1.177631 | 7.654652 | 0.021314 |
| TBXAS1|81964|AP | 2.299333 | 1.751494 | 1.08624 | 2.824175 | 0.021486 |
| HNRNPK|86709|AP | 2.279271 | 12.23138 | 1.42019 | 105.3427 | 0.022651 |
| HNRNPK|86708|AP | -2.27914 | 0.081766 | 0.009494 | 0.704229 | 0.022659 |
| ZC3H11A|9458|RI | 2.256446 | 8.10811 | 1.316515 | 49.93596 | 0.024043 |
| GPR107|87896|ES | -2.24811 | 0.243749 | 0.071197 | 0.834493 | 0.024569 |
| STAT1|56594|AT | 2.243721 | 9.080732 | 1.321815 | 62.38369 | 0.02485 |
| COL1A1|265435|ES | -2.24127 | 0.181246 | 0.040704 | 0.807054 | 0.025008 |
| TMEM98|40217|ES | -2.22765 | 0.039766 | 0.00233 | 0.678751 | 0.025904 |
| EEF1D|85442|ES | 2.226667 | 21.16271 | 1.441361 | 310.7202 | 0.02597 |
| ZMIZ2|79561|AA | -2.2264 | 0.118755 | 0.018199 | 0.774928 | 0.025987 |
| HDAC8|89459|AT | 2.220009 | 3.458229 | 1.156431 | 10.3416 | 0.026418 |
| TSPO|62571|AP | 2.215739 | 20176.47 | 3.140018 | 1.3E+08 | 0.026709 |
| RPS6KA1|1280|AP | 2.209754 | 2.745299 | 1.120929 | 6.723589 | 0.027122 |
| CUL2|11224|ES | -2.20382 | 0.381044 | 0.161553 | 0.898739 | 0.027537 |
| CFLAR|56783|AP | 2.200283 | 4.534955 | 1.179538 | 17.43548 | 0.027787 |
| FAM160B2|82935|RI | -2.18504 | 0.023306 | 0.0008 | 0.678952 | 0.028886 |
| ARMCX5|89699|ES | -2.18153 | 0.413268 | 0.186828 | 0.914161 | 0.029144 |
| SEP15|3687|ES | 2.178239 | 48.84917 | 1.476507 | 1616.14 | 0.029388 |
| CTAGE5|27371|AP | -2.17712 | 0.466803 | 0.235109 | 0.926826 | 0.029472 |
| D2HGDH|58414|ES | 2.176267 | 2.196966 | 1.08137 | 4.463467 | 0.029535 |
| LAG3|19968|AT | -2.17388 | 0.148116 | 0.026474 | 0.828678 | 0.029714 |
| APOBEC3G|62277|AP | 2.173347 | 16.94824 | 1.320315 | 217.5563 | 0.029754 |
| APOBEC3G|62278|AP | -2.17335 | 0.059003 | 0.004597 | 0.757395 | 0.029754 |
| TMEM176B|82256|AP | 2.165955 | 3.231291 | 1.118005 | 9.339177 | 0.030315 |
| COL1A1|265349|ES | -2.16016 | 0.213083 | 0.0524 | 0.866505 | 0.03076 |
| HCLS1|66398|AA | -2.1563 | 0.000126 | 3.58E-08 | 0.44141 | 0.03106 |
| RAD51B|28110|AT | -2.14704 | 0.392873 | 0.16744 | 0.921821 | 0.03179 |
| PIGP|60540|AP | -2.13954 | 0.329863 | 0.119425 | 0.911114 | 0.032392 |
| RPL17|45479|AP | 2.136484 | 67.8786 | 1.416906 | 3251.806 | 0.03264 |
| SDC1|52759|AP | -2.13321 | 0.319779 | 0.11218 | 0.911562 | 0.032907 |
| SGSM2|38394|ES | 2.131552 | 3.113684 | 1.095741 | 8.847916 | 0.033044 |
| FAM49B|85137|AP | 2.128214 | 2.493268 | 1.074898 | 5.78323 | 0.033319 |
| DMKN|49166|ES | 2.126818 | 1.699944 | 1.042505 | 2.771985 | 0.033435 |
| LETMD1|21743|ES | -2.11454 | 0.534074 | 0.298618 | 0.955185 | 0.034469 |
| PIK3IP1|61841|AT | 2.112557 | 140632.9 | 2.35425 | 8.4E+09 | 0.034639 |
| C21orf58|60929|AA | -2.10998 | 0.341553 | 0.125917 | 0.926468 | 0.03486 |
| MFSD6|56564|AP | 2.097116 | 4.125571 | 1.097117 | 15.51369 | 0.035983 |
| PDPN|710|AP | -2.09156 | 0.326132 | 0.11413 | 0.931933 | 0.036478 |
| VPS29|24446|ES | -2.08931 | 0.397465 | 0.167265 | 0.94448 | 0.03668 |
| SEC31A|69729|AD | -2.08438 | 0.096733 | 0.010757 | 0.869862 | 0.037126 |
| GDPD5|17865|ES | -2.06971 | 0.420289 | 0.184952 | 0.955076 | 0.038479 |
| MOB4|56703|ES | -2.06611 | 0.052942 | 0.00326 | 0.859878 | 0.038818 |
| AUP1|137302|ES | -2.06588 | 0.396297 | 0.164684 | 0.953652 | 0.038839 |
| HDAC9|78886|AP | 2.063682 | 2.014997 | 1.035839 | 3.919733 | 0.039048 |
| PLD3|117708|ES | -2.06249 | 0.248974 | 0.066424 | 0.933218 | 0.039161 |
| UBN1|33867|AP | 2.062155 | 37.84297 | 1.197285 | 1196.115 | 0.039193 |
| C8orf47|84642|ES | 2.062095 | 3.859591 | 1.069178 | 13.93261 | 0.039199 |
| CP|67214|AT | 2.060731 | 2.633996 | 1.048498 | 6.617024 | 0.039329 |
| CP|67213|AT | -2.06069 | 0.379659 | 0.151128 | 0.953765 | 0.039333 |
| CDK10|38119|ES | -2.05793 | 0.364534 | 0.139425 | 0.953095 | 0.039596 |
| NTMT1|87869|ES | 2.056283 | 2.214131 | 1.037934 | 4.723207 | 0.039755 |
| CDK5RAP2|87382|ES | 2.054988 | 4.269043 | 1.069416 | 17.04175 | 0.03988 |
| SSH2|40062|AT | -2.05496 | 0.366325 | 0.140571 | 0.954638 | 0.039883 |
| ATP2C1|66768|ES | -2.05402 | 0.315372 | 0.104856 | 0.948528 | 0.039974 |
| PAK1|17950|AP | 2.052971 | 2.763026 | 1.04712 | 7.290775 | 0.040075 |
| PAK1|17951|AP | -2.05297 | 0.361922 | 0.13716 | 0.955001 | 0.040075 |
| NFATC1|46239|AT | 2.052037 | 3.568976 | 1.058747 | 12.03082 | 0.040166 |
| NFATC1|46240|AT | -2.05191 | 0.280214 | 0.083126 | 0.944586 | 0.040178 |
| CAMSAP3|101652|ES | 2.045284 | 3.832341 | 1.057644 | 13.88637 | 0.040827 |
| COL18A1|60874|AP | -2.0443 | 0.263771 | 0.073507 | 0.946507 | 0.040924 |
| CLIP3|49329|AP | 2.038463 | 6.622076 | 1.075513 | 40.77301 | 0.041504 |
| NPAS3|27140|AP | 2.037326 | 1.977535 | 1.02623 | 3.810694 | 0.041617 |
| VPS13C|30971|AT | -2.03536 | 0.030766 | 0.001077 | 0.879012 | 0.041815 |
| IL15|70676|ES | -2.03365 | 0.443049 | 0.202169 | 0.970932 | 0.041986 |
| CRYAB|18691|AP | -2.03001 | 0.324151 | 0.109239 | 0.961873 | 0.042355 |
| PCDHA4|73775|RI | -2.02699 | 0.641314 | 0.41737 | 0.985417 | 0.042663 |
| GEMIN4|38260|AP | 2.023851 | 2.092462 | 1.023581 | 4.277529 | 0.042985 |
| GEMIN4|38259|AP | -2.02337 | 0.478081 | 0.233909 | 0.97714 | 0.043035 |
| SLC44A2|47559|AP | -2.01927 | 0.232107 | 0.056235 | 0.958008 | 0.043459 |
| PRR13|22042|AD | -2.01748 | 0.19056 | 0.03807 | 0.953837 | 0.043645 |
| ZNF738|48761|AT | -2.01349 | 0.154339 | 0.025034 | 0.951537 | 0.044063 |
| HAVCR2|74315|ES | 2.012554 | 238.975 | 1.153847 | 49494.45 | 0.044162 |
| TEAD4|19741|AP | -2.00811 | 0.232012 | 0.055749 | 0.96558 | 0.044632 |
| TEX30|26213|AP | 2.006839 | 3.876261 | 1.032153 | 14.55734 | 0.044767 |
| PACRG|78398|AP | -2.00217 | 0.558805 | 0.316117 | 0.987809 | 0.045267 |
| SMIM7|48187|RI | -2.00212 | 0.078791 | 0.006549 | 0.947899 | 0.045271 |
| KLC1|29468|AT | -1.9988 | 0.198213 | 0.040544 | 0.969044 | 0.04563 |
| MGLL|66624|AP | -1.99823 | 0.512648 | 0.266192 | 0.987287 | 0.045692 |
| TMEM9B|14286|AP | 1.993391 | 7.673648 | 1.034762 | 56.90668 | 0.046219 |
| CYB561|42932|AA | -1.99305 | 0.004459 | 2.18E-05 | 0.914062 | 0.046256 |
| ANTXR1|53844|AT | -1.99303 | 0.263649 | 0.071065 | 0.978128 | 0.046259 |
| KCTD7|79881|AT | -1.99018 | 0.33765 | 0.115902 | 0.983649 | 0.046571 |
| KCTD7|79880|AT | 1.990157 | 2.961595 | 1.016608 | 8.627752 | 0.046574 |
| RBMS2|22466|ES | -1.98356 | 0.011939 | 0.00015 | 0.94868 | 0.047304 |
| ZNF486|48718|AT | 1.983159 | 3.003088 | 1.012945 | 8.903287 | 0.04735 |
| IGSF1|90114|AT | -1.98055 | 0.520168 | 0.27242 | 0.993229 | 0.047642 |
| IL17RC|63261|AD | 1.979951 | 2.827608 | 1.010548 | 7.911913 | 0.047709 |
| ZNF226|50295|AA | 1.977038 | 2.439557 | 1.007732 | 5.905779 | 0.048037 |
| GNAS|60003|ES | -1.97631 | 0.222891 | 0.050301 | 0.987661 | 0.04812 |
| MGLL|66622|AP | 1.974374 | 1.93423 | 1.004827 | 3.723274 | 0.048339 |
| NGLY1|63754|ES | 1.972564 | 11.71687 | 1.015845 | 135.1437 | 0.048545 |
| PNPLA6|47108|AP | 1.971487 | 2.15819 | 1.004506 | 4.636888 | 0.048668 |
| ANGPT1|84859|AP | -1.97128 | 0.552655 | 0.30647 | 0.996601 | 0.048692 |
| ANTXR1|53845|AT | 1.968521 | 3.64897 | 1.005643 | 13.24027 | 0.049008 |
| CD86|66423|ES | -1.96124 | 0.199766 | 0.039948 | 0.998952 | 0.049851 |
| ZNF185|90396|AP | 1.957489 | 4.071251 | 0.998226 | 16.60454 | 0.05029 |
| C16orf58|36280|ES | 1.955362 | 914416.2 | 0.968213 | 8.64E+11 | 0.05054 |
| ATOX1|96970|ES | -1.95536 | 1.40E-05 | 1.90E-10 | 1.026671 | 0.050541 |
| SEC31A|69740|AA | 1.954079 | 11.68116 | 0.992624 | 137.4633 | 0.050692 |
| NUP85|43382|AP | -1.9526 | 0.237905 | 0.056293 | 1.005431 | 0.050867 |
| SLC9B2|70167|AP | -1.94425 | 0.584034 | 0.339617 | 1.004356 | 0.051865 |
| MBD4|66719|AD | 1.944144 | 34.37709 | 0.971626 | 1216.296 | 0.051878 |
| GLYCTK|65211|ES | -1.9424 | 0.517206 | 0.265911 | 1.005981 | 0.052089 |
| COL1A1|265430|ES | -1.94066 | 0.244934 | 0.059159 | 1.014088 | 0.052299 |
| MFSD12|46692|AP | 1.939598 | 30.91037 | 0.964614 | 990.5004 | 0.052429 |
| SOD2|78304|RI | 1.935496 | 3.286178 | 0.985073 | 10.96261 | 0.052929 |
| ZNF680|79826|AT | -1.93415 | 0.129454 | 0.016307 | 1.02766 | 0.053095 |
| ZNF655|80663|AT | 1.932302 | 2.357608 | 0.987797 | 5.626979 | 0.053322 |
| ZNF655|80662|AT | -1.9323 | 0.424159 | 0.177715 | 1.012353 | 0.053322 |
| CAMLG|73424|ES | 1.926029 | 22.33687 | 0.946742 | 527.0028 | 0.054101 |
| RAB3A|48402|ES | 1.925299 | 1928.317 | 0.872671 | 4260951 | 0.054192 |
| LRRTM1|54180|AT | -1.92302 | 0.230367 | 0.051593 | 1.028609 | 0.054478 |
| ANGPT1|84860|AP | 1.92177 | 1.781077 | 0.988594 | 3.208838 | 0.054635 |
| RAPH1|57075|AT | 1.912372 | 2.904909 | 0.97381 | 8.665443 | 0.055828 |
| TRAK1|64268|AT | 1.911707 | 4.258161 | 0.964088 | 18.80735 | 0.055914 |
| SKA2|42757|ES | 1.909398 | 3.432422 | 0.967867 | 12.17266 | 0.056211 |
| UFD1L|96080|ES | -1.90876 | 0.009981 | 8.80E-05 | 1.131557 | 0.056293 |
| ZNF726|48832|AT | 1.908207 | 3.429203 | 0.967128 | 12.15913 | 0.056364 |
| BTD|63615|AP | -1.89645 | 0.462557 | 0.208505 | 1.026158 | 0.057901 |
| KLK8|117215|ES | -1.89632 | 0.24607 | 0.057767 | 1.048186 | 0.057918 |
| SSH2|40060|AT | 1.896184 | 2.628054 | 0.968022 | 7.134828 | 0.057936 |
| SCARF2|61158|AA | -1.89054 | 0.273972 | 0.071576 | 1.048693 | 0.058686 |
| STAU2|84153|AP | 1.889921 | 8.366532 | 0.924292 | 75.73237 | 0.058768 |
| ALG13|89905|AT | -1.8882 | 0.37668 | 0.136719 | 1.037806 | 0.058999 |
| ALG13|89906|AT | 1.888191 | 2.654762 | 0.963567 | 7.31424 | 0.059 |
| BTD|63617|AP | 1.887431 | 2.154504 | 0.970934 | 4.780847 | 0.059102 |
| AMPD3|14346|AP | 1.886668 | 1.885155 | 0.97567 | 3.642429 | 0.059205 |
| SPAG9|42494|ES | 1.886625 | 2.089982 | 0.971751 | 4.495003 | 0.059211 |
| PFN2|67256|AA | -1.88183 | 0.456169 | 0.201418 | 1.033124 | 0.059859 |
| DACT3|50577|AT | 1.880641 | 4.287673 | 0.940446 | 19.54832 | 0.060021 |
| YPEL3|36066|AP | 1.880546 | 14.49526 | 0.893224 | 235.2294 | 0.060034 |
| PCBP2|22058|ES | -1.87792 | 0.012872 | 0.000137 | 1.209454 | 0.060392 |
| DENND1A|87517|ES | -1.87425 | 0.45819 | 0.202577 | 1.03634 | 0.060897 |
| TJP1|29766|ES | -1.87249 | 0.553687 | 0.298218 | 1.028002 | 0.061139 |
| DNM1L|21048|ES | -1.87105 | 0.408596 | 0.159999 | 1.043449 | 0.061338 |
| ZBTB7B|101302|ES | 1.87094 | 2.428764 | 0.958655 | 6.1533 | 0.061353 |
| SLC7A6|37213|ES | 1.870574 | 2.308869 | 0.960802 | 5.548358 | 0.061404 |
| CCDC66|65343|AT | 1.869835 | 3.561181 | 0.940616 | 13.48266 | 0.061507 |
| IRF2|71290|AP | 1.865554 | 34.40672 | 0.836055 | 1415.963 | 0.062104 |
| ZDHHC4|78747|RI | -1.86531 | 0.415348 | 0.164991 | 1.045595 | 0.062138 |
| GPR108|47073|AP | -1.86482 | 0.329749 | 0.102751 | 1.058236 | 0.062207 |
| GPR108|47074|AP | 1.864802 | 3.032604 | 0.944958 | 9.732372 | 0.062209 |
| C4orf47|71354|ES | 1.863243 | 2.117428 | 0.961806 | 4.661546 | 0.062428 |
| CD200|66102|ES | -1.86298 | 0.443688 | 0.188705 | 1.04321 | 0.062464 |
| USO1|69551|ES | 1.862419 | 1.858264 | 0.968067 | 3.567053 | 0.062544 |
| APOBEC3D|62272|AP | 1.858888 | 24.70852 | 0.839971 | 726.8236 | 0.063043 |
| APMAP|58855|ES | 1.855928 | 1180.603 | 0.672652 | 2072132 | 0.063464 |
| MUC1|7971|ES | 1.855748 | 1.749293 | 0.969083 | 3.157651 | 0.06349 |
| TAPT1|68831|ES | -1.85528 | 0.022489 | 0.000408 | 1.23877 | 0.063556 |
| FRMD4B|65582|AP | -1.85434 | 0.429575 | 0.175863 | 1.049308 | 0.063691 |
| TRABD|62790|AP | 1.848726 | 3.580718 | 0.926121 | 13.84435 | 0.064497 |
| FAM21C|11374|ES | 1.847986 | 1039.865 | 0.656429 | 1647277 | 0.064604 |
| NAGLU|41057|ES | -1.84405 | 0.019074 | 0.000284 | 1.282589 | 0.065176 |
| TRAK1|64269|AT | -1.83536 | 0.264024 | 0.063683 | 1.094628 | 0.066453 |
| RUNX2|76401|AT | -1.82872 | 0.100788 | 0.008616 | 1.179033 | 0.067442 |
| SLC2A8|87631|ES | 1.826868 | 2.167906 | 0.945187 | 4.972368 | 0.06772 |
| PCMT1|78104|AT | 1.823296 | 4.173657 | 0.898439 | 19.38854 | 0.068258 |
| TPRA1|66613|ES | -1.8211 | 0.033217 | 0.000851 | 1.296423 | 0.068591 |
| TAOK3|24697|AP | 1.82089 | 1.910741 | 0.95175 | 3.836021 | 0.068624 |
| SLC6A6|63526|AT | -1.82056 | 0.231525 | 0.047923 | 1.118545 | 0.068674 |
| CNDP2|45811|AP | -1.82044 | 0.065362 | 0.003466 | 1.232519 | 0.068691 |
| FADS2|16291|AP | 1.818706 | 2.31829 | 0.93678 | 5.737174 | 0.068956 |
| SDCBP2|58484|AP | 1.815477 | 1.615106 | 0.962565 | 2.710016 | 0.069451 |
| CLEC2D|20234|AD | 1.814199 | 1.876836 | 0.950673 | 3.705285 | 0.069647 |
| ZNF423|36353|AP | -1.81414 | 0.558218 | 0.297342 | 1.047978 | 0.069656 |
| TMEM161B|72735|RI | -1.81398 | 0.416325 | 0.161524 | 1.073068 | 0.069681 |
| OCIAD1|69239|AD | -1.81346 | 0.047468 | 0.001761 | 1.279168 | 0.069761 |
| PACRG|78397|AP | 1.812873 | 1.684714 | 0.958562 | 2.960956 | 0.069851 |
| B4GALT4|66286|AD | -1.81056 | 0.102654 | 0.008733 | 1.206645 | 0.070209 |
| PPHLN1|21223|ES | 1.806439 | 499545.8 | 0.327861 | 7.61E+11 | 0.07085 |
| SLC27A1|48307|AP | -1.80621 | 0.537734 | 0.274283 | 1.054231 | 0.070886 |
| MED15|61161|AP | 1.803536 | 107.6517 | 0.66643 | 17389.51 | 0.071304 |
| TTC23L|71732|RI | -1.80082 | 0.63065 | 0.381842 | 1.041583 | 0.071732 |
| TCF12|30784|AP | -1.80033 | 0.380429 | 0.132841 | 1.089473 | 0.071808 |
| HOXB3|42196|AP | 1.797462 | 2.448004 | 0.922251 | 6.497931 | 0.072262 |
| SLC29A4|78658|AA | -1.79525 | 0.36709 | 0.122917 | 1.09631 | 0.072615 |
| ICA1|78784|AP | 1.792158 | 2.654409 | 0.912646 | 7.720281 | 0.073108 |
| TMX3|45761|ES | -1.78791 | 0.281152 | 0.06996 | 1.12987 | 0.07379 |
| IGSF1|90115|AT | 1.786497 | 1.808346 | 0.944101 | 3.463736 | 0.074019 |
| PCYT2|44230|ES | 1.782689 | 1.96029 | 0.935257 | 4.108749 | 0.074637 |
| YIPF2|47605|AD | -1.7825 | 0.091533 | 0.006604 | 1.268773 | 0.074668 |
| TMEM134|17235|ES | 1.782251 | 3.763338 | 0.876209 | 16.16362 | 0.074708 |
| SAP30BP|43482|ES | -1.78097 | 0.012417 | 9.92E-05 | 1.554372 | 0.074917 |
| TPM2|86278|ME | 1.780374 | 2.368689 | 0.91669 | 6.12059 | 0.075015 |
| HIBCH|56560|ES | -1.78007 | 0.130764 | 0.013922 | 1.228247 | 0.075064 |
| ARTN|2483|AP | -1.77505 | 0.46315 | 0.19798 | 1.083483 | 0.075889 |
| ACSL6|73248|AT | 1.772233 | 1.512929 | 0.957088 | 2.391582 | 0.076356 |
| ACSL6|73246|AT | -1.77223 | 0.66097 | 0.418134 | 1.044836 | 0.076356 |
| SPIRE2|38153|AT | 1.770268 | 6.463562 | 0.818752 | 51.02599 | 0.076683 |
| PLEKHB2|55368|AP | 1.770059 | 3.42026 | 0.8764 | 13.348 | 0.076717 |
| IL32|33406|ES | -1.76755 | 0.484436 | 0.216875 | 1.082092 | 0.077136 |
| PPAN|47461|AT | 1.767193 | 2.638584 | 0.899571 | 7.739385 | 0.077196 |
| PPAN|47460|AT | -1.76718 | 0.378994 | 0.12921 | 1.111647 | 0.077198 |
| DECR1|84411|ES | 1.766633 | 1.954496 | 0.929289 | 4.110728 | 0.07729 |
| CHST15|13395|AP | -1.76471 | 0.348566 | 0.108125 | 1.123683 | 0.077613 |
| CPNE5|75990|AP | -1.76371 | 0.687063 | 0.452746 | 1.042648 | 0.077781 |
| CAMTA1|502|AT | -1.76042 | 0.098538 | 0.007467 | 1.300386 | 0.078336 |
| ERBB2|40677|AP | 1.759384 | 20.97918 | 0.706819 | 622.6855 | 0.078512 |
| PPM1F|61261|AT | 1.756345 | 4.455145 | 0.84096 | 23.60198 | 0.07903 |
| CD74|74077|ES | 1.755888 | 6.022695 | 0.811652 | 44.69016 | 0.079108 |
| PAM|72887|ES | 1.753167 | 13.44336 | 0.736013 | 245.5447 | 0.079573 |
| COL1A1|265444|ES | -1.75265 | 0.270952 | 0.062908 | 1.167025 | 0.079662 |
| IL10RA|18955|ES | 1.752118 | 27.36386 | 0.675327 | 1108.769 | 0.079754 |
| TNIK|67628|AT | 1.750313 | 2.15416 | 0.912179 | 5.087163 | 0.080064 |
| AP2M1|67841|ES | 1.750128 | 5.110752 | 0.822346 | 31.76253 | 0.080096 |
| C1orf198|10247|AP | 1.746732 | 4.754955 | 0.82668 | 27.34989 | 0.080684 |
| LYNX1|85361|AP | 1.744973 | 1.462238 | 0.954265 | 2.240614 | 0.08099 |
| ERBB3|22353|AP | -1.74361 | 0.504962 | 0.234259 | 1.088479 | 0.081226 |
| BCCIP|13433|AT | -1.74141 | 0.281373 | 0.067522 | 1.172513 | 0.081612 |
| DCUN1D2|26378|ES | 1.739655 | 2.913926 | 0.873331 | 9.722504 | 0.08192 |
| TNIK|67627|AT | -1.73752 | 0.46702 | 0.19785 | 1.102385 | 0.082296 |
| SLC25A14|98403|ES | -1.73748 | 0.250249 | 0.052445 | 1.194096 | 0.082303 |
| NR1H3|114106|ES | -1.7367 | 0.543646 | 0.273278 | 1.0815 | 0.08244 |
| PIGP|60541|AP | 1.734589 | 2.332366 | 0.895802 | 6.072691 | 0.082814 |
| GNAS|60005|ES | -1.73437 | 0.281002 | 0.066944 | 1.179526 | 0.082852 |
| FAM102A|87691|AP | 1.733011 | 31.05481 | 0.637665 | 1512.394 | 0.083094 |
| CPSF4|80635|AA | -1.7309 | 0.292212 | 0.072558 | 1.176814 | 0.083469 |
| AUP1|116373|ES | -1.73057 | 0.332314 | 0.095428 | 1.157232 | 0.083528 |
| ITGB6|55713|AD | -1.7279 | 0.130931 | 0.013047 | 1.313967 | 0.084006 |
| ATP5G2|22101|ES | 1.726504 | 2.268338 | 0.89516 | 5.747975 | 0.084257 |
| TMEM234|1570|RI | -1.72544 | 0.387544 | 0.132034 | 1.13751 | 0.084448 |
| EXOSC9|70500|RI | -1.72505 | 0.535868 | 0.263765 | 1.088673 | 0.084519 |
| ZNF423|36351|AP | 1.724811 | 1.68899 | 0.931036 | 3.063995 | 0.084561 |
| CKLF|36728|AT | -1.72433 | 0.020347 | 0.000243 | 1.702739 | 0.084649 |
| ANAPC11|44218|ES | -1.72369 | 0.156968 | 0.019116 | 1.288943 | 0.084764 |
| TLE6|46632|AT | -1.72351 | 0.616474 | 0.355638 | 1.068616 | 0.084796 |
| SLC9A3R2|33187|AP | 1.722143 | 9.449593 | 0.73333 | 121.7662 | 0.085044 |
| CHMP3|54438|AP | -1.72081 | 7.00E-05 | 1.30E-09 | 3.779576 | 0.085285 |
| PPM1B|53413|AT | 1.7196 | 3.586821 | 0.836495 | 15.38 | 0.085505 |
| SHMT2|22556|ES | 1.719288 | 3.097888 | 0.853606 | 11.24278 | 0.085562 |
| ZNF525|51710|AT | -1.7187 | 0.164334 | 0.020958 | 1.288531 | 0.08567 |
| KCTD1|44993|AP | -1.71849 | 0.320038 | 0.087272 | 1.173616 | 0.085707 |
| SHANK2|17409|AT | -1.7159 | 0.037535 | 0.000883 | 1.595008 | 0.08618 |
| SEPT6|89977|ES | -1.71177 | 0.5028 | 0.228821 | 1.104828 | 0.086938 |
| H2AFV|79576|ES | -1.71028 | 6.55E-05 | 1.05E-09 | 4.081163 | 0.087215 |
| NT5C3A|79208|AP | 1.708351 | 2.407228 | 0.878635 | 6.595172 | 0.087571 |
| TNFRSF12A|33345|AP | 1.707124 | 2397.466 | 0.315813 | 18200145 | 0.087799 |
| ITPKB|10022|AT | 1.704687 | 4.423674 | 0.800376 | 24.44962 | 0.088253 |
| ARAP1|17642|ES | 1.703523 | 8.823925 | 0.720516 | 108.0637 | 0.08847 |
| IGFLR1|95135|ES | -1.70221 | 0.245141 | 0.048571 | 1.237246 | 0.088716 |
| AAK1|53856|AT | -1.69911 | 0.455979 | 0.184302 | 1.128133 | 0.089299 |
| TLE6|46631|AT | 1.698565 | 1.609385 | 0.929386 | 2.786916 | 0.089401 |
| ICA1|78781|AP | -1.69179 | 0.413698 | 0.1488 | 1.150171 | 0.090687 |
| SETMAR|62996|AA | 1.690147 | 2.160479 | 0.884285 | 5.278471 | 0.091 |
| WBSCR22|80010|AD | 1.689787 | 2.14155 | 0.885361 | 5.180077 | 0.091069 |
| SDC1|52760|AP | 1.689082 | 2.508887 | 0.862848 | 7.295047 | 0.091204 |
| SETDB1|7522|ES | -1.68864 | 0.014837 | 0.000112 | 1.967083 | 0.091289 |
| CD96|66051|AT | 1.688461 | 2.294869 | 0.874965 | 6.019014 | 0.091323 |
| FOXJ3|2069|ES | 1.687562 | 3.838732 | 0.804826 | 18.30938 | 0.091495 |
| AXL|50027|ES | 1.686775 | 2.473046 | 0.8636 | 7.081937 | 0.091647 |
| PPM1B|53414|AT | -1.68677 | 0.282991 | 0.065276 | 1.226853 | 0.091648 |
| CAST|72858|ES | 1.685886 | 3.889884 | 0.80185 | 18.87037 | 0.091818 |
| XAF1|38808|ES | -1.68475 | 0.41871 | 0.152077 | 1.152823 | 0.092037 |
| LIMD2|42948|AP | -1.68325 | 0.163549 | 0.019862 | 1.346702 | 0.092327 |
| MKI67|13470|ES | 1.681004 | 2.499911 | 0.858944 | 7.275856 | 0.092762 |
| PPP1R7|58335|ES | 1.680723 | 73.02264 | 0.490229 | 10877.17 | 0.092817 |
| FIP1L1|69310|AT | -1.67948 | 0.31055 | 0.079332 | 1.215671 | 0.093058 |
| RWDD2B|60299|ES | -1.67844 | 0.173854 | 0.022539 | 1.341043 | 0.093261 |
| MCCC1|67769|AP | 1.676001 | 4.502568 | 0.77497 | 26.15987 | 0.093738 |
| HNRNPK|86714|ES | 1.675878 | 13.82721 | 0.640662 | 298.4283 | 0.093762 |
| KLHL7|78948|AP | 1.674223 | 12.05236 | 0.653872 | 222.1526 | 0.094087 |
| OPTN|10784|ES | 1.672749 | 3.560143 | 0.804103 | 15.76244 | 0.094377 |
| PHTF1|4285|AA | 1.671619 | 1.962035 | 0.890245 | 4.324178 | 0.094599 |
| LTBP4|49934|ES | -1.67122 | 0.371888 | 0.116574 | 1.186376 | 0.094679 |
| ETHE1|50201|ES | -1.66749 | 0.075017 | 0.003573 | 1.575051 | 0.095417 |
| RPGRIP1L|36422|AT | -1.66711 | 0.37824 | 0.120605 | 1.186239 | 0.095493 |
| OSBP2|61799|AP | 1.666055 | 1.701546 | 0.910494 | 3.179877 | 0.095702 |
| KLK8|117214|ES | -1.66558 | 0.437906 | 0.165721 | 1.157135 | 0.095797 |
| REPS2|88583|ES | -1.66315 | 0.402232 | 0.13752 | 1.17649 | 0.096283 |
| NAA60|33518|AP | -1.66272 | 0.489932 | 0.211289 | 1.136042 | 0.096368 |
| SDK1|78640|ES | -1.66197 | 0.455637 | 0.180313 | 1.151356 | 0.096518 |
| BFAR|34098|ES | -1.6612 | 0.484852 | 0.206384 | 1.139049 | 0.096673 |
| HDAC9|78887|AP | -1.66075 | 0.562248 | 0.284971 | 1.109316 | 0.096764 |
| SIPA1|16886|AP | 1.660502 | 2.248771 | 0.86403 | 5.852773 | 0.096814 |
| WNK1|19618|ES | -1.65663 | 0.449735 | 0.174731 | 1.157563 | 0.097594 |
| BLOC1S6|30431|AT | -1.65477 | 0.334691 | 0.091541 | 1.223688 | 0.097971 |
| SYNGR1|62298|AT | -1.65425 | 0.488462 | 0.209005 | 1.141578 | 0.098077 |
| DDX46|73425|AD | -1.6535 | 0.120133 | 0.009744 | 1.481082 | 0.09823 |
| ACAP1|38919|AP | 1.651918 | 2.102678 | 0.870583 | 5.078499 | 0.098551 |
| COPS3|39472|ES | -1.64967 | 0.000118 | 2.53E-09 | 5.483168 | 0.099011 |
| PRKAR1A|43143|AP | 1.649543 | 4.188497 | 0.763725 | 22.97097 | 0.099037 |
| KCTD1|44994|AP | 1.645921 | 2.989903 | 0.811418 | 11.01716 | 0.09978 |
| MFAP5|20196|ES | -1.64379 | 0.216032 | 0.034756 | 1.342777 | 0.100221 |
| BARX2|19454|AP | 1.641837 | 17.16963 | 0.576434 | 511.4137 | 0.100624 |
| SUV420H1|17300|ES | 1.640619 | 16.69661 | 0.578118 | 482.2149 | 0.100877 |
| PLGLB1|54461|AT | -1.64024 | 0.390398 | 0.126879 | 1.201226 | 0.100955 |
| LIPA|12486|AP | -1.63955 | 0.560121 | 0.280136 | 1.119936 | 0.101099 |
| ERBB3|22351|AP | 1.638697 | 1.781765 | 0.892937 | 3.555331 | 0.101276 |
| ARL6IP4|25032|AD | 1.638558 | 6.02671 | 0.70305 | 51.6624 | 0.101305 |
| NEDD4L|45651|AP | -1.63608 | 0.511492 | 0.229108 | 1.141927 | 0.101822 |
| ABCA2|88259|ES | 1.632665 | 1.975079 | 0.872458 | 4.471206 | 0.102539 |
| TANK|55743|ES | 1.630681 | 2.057621 | 0.864415 | 4.897883 | 0.102958 |
| KARS|37643|ES | -1.63053 | 0.288795 | 0.064893 | 1.285234 | 0.102989 |
| CRYAB|18690|AP | 1.630187 | 2.394855 | 0.838058 | 6.843596 | 0.103062 |
| ACER3|17923|ES | -1.62319 | 0.498257 | 0.21485 | 1.155501 | 0.104548 |
| GPR64|88619|ES | 1.621933 | 2.145516 | 0.852913 | 5.397079 | 0.104818 |
| ZNF692|10560|ES | 1.620768 | 1.836076 | 0.880588 | 3.828325 | 0.105067 |
| SUMF2|79790|ES | -1.62013 | 0.001693 | 7.51E-07 | 3.81345 | 0.105204 |
| RNH1|13664|AP | -1.61701 | 0.280407 | 0.060043 | 1.309536 | 0.105875 |
| ZMYM3|89406|AP | 1.616884 | 4.459669 | 0.72816 | 27.31356 | 0.105903 |
| RNH1|13662|AP | 1.612321 | 3.60382 | 0.758495 | 17.12274 | 0.106892 |
| ADD3|13077|ES | -1.61222 | 0.364916 | 0.107141 | 1.242885 | 0.106914 |
| MSH6|53500|AP | 1.612005 | 31.14776 | 0.476032 | 2038.062 | 0.106961 |
| SLC2A9|96681|ES | 1.611854 | 2.579128 | 0.814957 | 8.162273 | 0.106994 |
| BCL7B|79948|ES | -1.61026 | 8.19E-05 | 8.70E-10 | 7.717885 | 0.107342 |
| BIRC5|43862|ES | -1.60927 | 0.343138 | 0.093262 | 1.262503 | 0.107558 |
| RBM39|59238|AA | -1.60869 | 0.115228 | 0.008283 | 1.602943 | 0.107684 |
| OARD1|76086|ES | 1.608351 | 7.077029 | 0.651941 | 76.82346 | 0.107758 |
| ENSA|7494|AT | 1.608136 | 2.620004 | 0.809998 | 8.474617 | 0.107805 |
| GTF2I|80087|ES | -1.6081 | 0.275789 | 0.057378 | 1.325577 | 0.107813 |
| SMIM11|60479|AT | -1.60789 | 0.241007 | 0.042535 | 1.365575 | 0.10786 |
| RDX|18630|AT | 1.607344 | 2936.53 | 0.17347 | 49710025 | 0.107979 |
| DERL2|38704|ES | -1.60584 | 0.573501 | 0.290951 | 1.130444 | 0.10831 |
| COL1A1|265431|ES | -1.60167 | 0.293599 | 0.065531 | 1.315418 | 0.109229 |
| TRAPPC6A|50413|AD | -1.60121 | 0.2904 | 0.063926 | 1.319218 | 0.10933 |
| ATP5C1|10726|ES | -1.59775 | 0.063107 | 0.002129 | 1.870809 | 0.1101 |
| FNBP1|87887|ES | 1.596615 | 1.861492 | 0.868133 | 3.991499 | 0.110351 |
| SETD4|60516|AT | -1.59228 | 0.533819 | 0.246512 | 1.155978 | 0.111322 |
| SETD4|60515|AT | 1.592226 | 1.873255 | 0.86505 | 4.056511 | 0.111334 |
| LMNA|8184|ES | 1.59219 | 9412.96 | 0.120816 | 7.33E+08 | 0.111342 |
| BRF1|29612|AT | 1.592084 | 85.98244 | 0.357289 | 20691.87 | 0.111366 |
| MASP1|68073|AT | 1.591599 | 2.423963 | 0.814712 | 7.211869 | 0.111475 |
| PTPN18|55342|ES | 1.589257 | 2.376676 | 0.81715 | 6.912544 | 0.112002 |
| BCKDHB|76828|RI | -1.58919 | 0.445974 | 0.164741 | 1.207309 | 0.112017 |
| LYRM4|75240|AT | -1.58919 | 0.404127 | 0.1322 | 1.235391 | 0.112018 |
| LYRM4|75241|AT | 1.588257 | 2.502868 | 0.806774 | 7.764688 | 0.112228 |
| ALPL|975|AP | -1.58766 | 0.011735 | 4.86E-05 | 2.835951 | 0.112363 |
| ING3|81587|ES | -1.58678 | 0.357787 | 0.100523 | 1.273449 | 0.112563 |
| CDK20|86782|ES | -1.58631 | 0.328642 | 0.083102 | 1.299676 | 0.112669 |
| GGPS1|10344|AP | 1.586268 | 4.222211 | 0.712253 | 25.02911 | 0.112678 |
| PALLD|71133|ES | 1.584846 | 7.06007 | 0.629644 | 79.16316 | 0.113001 |
| CPNE5|75991|AP | 1.584366 | 1.397486 | 0.923726 | 2.114228 | 0.11311 |
| LY6E|85388|AA | -1.5838 | 0.001151 | 2.65E-07 | 4.989145 | 0.11324 |
| MEMO1|95465|ES | -1.58303 | 0.104854 | 0.006426 | 1.710842 | 0.113415 |
| TSPAN14|12366|AP | 1.58259 | 12.61547 | 0.546368 | 291.2871 | 0.113515 |
| TAF11|75793|ES | 1.582535 | 25.91523 | 0.460121 | 1459.613 | 0.113527 |
| NFKB2|12947|AP | -1.58203 | 0.435932 | 0.155847 | 1.219382 | 0.113643 |
| N4BP2L2|25598|AD | 1.581692 | 5656.027 | 0.126637 | 2.53E+08 | 0.11372 |
| FYN|77269|AP | 1.581059 | 5.633962 | 0.660793 | 48.03549 | 0.113865 |
| RBBP8|44784|AP | 1.580075 | 2.415744 | 0.808919 | 7.214342 | 0.11409 |
| ARHGEF2|8144|ES | 1.579039 | 19.48641 | 0.488502 | 777.3144 | 0.114327 |
| ZNF519|44757|AT | -1.57883 | 0.455572 | 0.171667 | 1.209 | 0.114376 |
| AAK1|53858|AT | 1.576342 | 1.827883 | 0.863479 | 3.869414 | 0.114947 |
| ARHGAP22|11485|AP | 1.575623 | 1.785665 | 0.868118 | 3.673003 | 0.115113 |
| MED6|28183|AT | 1.573432 | 3.977995 | 0.712337 | 22.21483 | 0.115619 |
| PAX8|102557|ES | 1.57246 | 2.017737 | 0.841146 | 4.840138 | 0.115844 |
| ADCK3|10035|AP | 1.572205 | 3.049201 | 0.759597 | 12.24021 | 0.115903 |
| IFRD1|81446|AP | 1.57184 | 2.96372 | 0.764703 | 11.48634 | 0.115988 |
| CUTC|12778|ES | 1.570946 | 2.09211 | 0.832938 | 5.254799 | 0.116195 |
| NPLOC4|44130|AP | -1.56797 | 0.06807 | 0.002367 | 1.957761 | 0.116887 |
| RAF1|63446|ES | -1.56673 | 0.035576 | 0.000548 | 2.3102 | 0.117178 |
| TPM3|7789|AT | 1.565972 | 1400.128 | 0.161599 | 12131042 | 0.117355 |
| NFKB2|12946|AP | 1.565341 | 2.272962 | 0.813023 | 6.354502 | 0.117503 |
| PRRC2C|8991|AA | 1.562874 | 5.179157 | 0.658451 | 40.73753 | 0.118082 |
| FBXO4|71890|ES | -1.56148 | 0.623162 | 0.344179 | 1.128281 | 0.118411 |
| COL1A1|265348|ES | -1.55945 | 0.318858 | 0.075806 | 1.341193 | 0.11889 |
| DCAF6|91282|ES | -1.55818 | 0.159366 | 0.015817 | 1.605701 | 0.11919 |
| OSBPL2|60055|ES | -1.55628 | 0.001261 | 2.82E-07 | 5.649497 | 0.11964 |
| MAGED2|89245|AP | 1.555885 | 3.231867 | 0.737378 | 14.16501 | 0.119735 |
| IL32|33380|RI | 1.55488 | 4.829285 | 0.663486 | 35.1507 | 0.119975 |
| TAF1D|18317|ES | 1.55277 | 5.016677 | 0.655126 | 38.4156 | 0.120478 |
| TBC1D16|44014|AA | -1.55081 | 0.306545 | 0.068787 | 1.366089 | 0.120947 |
| ZNF142|57508|ES | -1.5496 | 0.52708 | 0.234477 | 1.184823 | 0.121239 |
| PDDC1|13757|ES | 1.54881 | 13.47938 | 0.501318 | 362.4322 | 0.121427 |
| HS1BP3|52782|ES | -1.54816 | 0.015432 | 7.85E-05 | 3.033003 | 0.121584 |
| ASMTL|88387|AP | -1.54744 | 0.023849 | 0.00021 | 2.70738 | 0.121758 |
| MIF4GD|43419|ES | 1.545682 | 2.294217 | 0.800462 | 6.57549 | 0.122181 |
| LIPA|12485|AP | 1.545005 | 1.725058 | 0.863772 | 3.445152 | 0.122345 |
| BCAS3|42872|ES | -1.54163 | 0.468611 | 0.17877 | 1.228369 | 0.123164 |
| D2HGDH|58416|ES | 1.540262 | 1.433497 | 0.906533 | 2.266783 | 0.123496 |
| ALKBH6|95158|ES | 1.540086 | 35.89056 | 0.376757 | 3418.999 | 0.123539 |
| C7orf55-LUC7L2|81956|AP | 1.536282 | 18.21672 | 0.449141 | 738.8529 | 0.124469 |
| PUS10|53676|AT | 1.535132 | 2.263548 | 0.797656 | 6.423384 | 0.124751 |
| PUS10|53675|AT | -1.53502 | 0.441807 | 0.155687 | 1.25375 | 0.124779 |
| SMDT1|62494|AD | -1.53438 | 0.000677 | 6.06E-08 | 7.569586 | 0.124937 |
| SLC7A7|26619|AP | -1.53298 | 0.65324 | 0.378999 | 1.12592 | 0.12528 |
| TMEM41B|14311|RI | -1.52545 | 0.209346 | 0.028073 | 1.561155 | 0.127146 |
| CCL4L2|40467|ES | -1.52385 | 0.220582 | 0.03157 | 1.541223 | 0.127546 |
| SYTL2|18142|AP | 1.521995 | 1.529291 | 0.884935 | 2.642829 | 0.12801 |
| CRYZ|3471|ES | -1.52169 | 0.44548 | 0.157221 | 1.262248 | 0.128088 |
| TXNRD1|24100|AP | -1.52149 | 0.269637 | 0.049833 | 1.458957 | 0.128137 |
| LAMP2|90000|AT | -1.5214 | 0.445013 | 0.156813 | 1.262877 | 0.128159 |
| ZNF250|124390|ES | -1.52007 | 0.168961 | 0.017065 | 1.672916 | 0.128494 |
| PLEC|85516|AP | 1.518371 | 2.504878 | 0.765631 | 8.19509 | 0.128921 |
| MYO1B|56608|ES | -1.5175 | 0.601967 | 0.312519 | 1.159498 | 0.129139 |
| THNSL2|54471|ES | -1.51729 | 0.511488 | 0.215141 | 1.216042 | 0.129194 |
| C11orf30|17893|ES | 1.516654 | 2.088877 | 0.80629 | 5.411707 | 0.129354 |
| COMT|61097|AP | 1.513969 | 12.70235 | 0.472945 | 341.1593 | 0.130034 |
| KRAS|20818|AT | 1.513619 | 196.3712 | 0.210768 | 182957.9 | 0.130122 |
| CALHM2|13009|AP | 1.512717 | 42.54774 | 0.329921 | 5487.103 | 0.130352 |
| TRPM2|60821|ES | 1.512225 | 1.783339 | 0.842587 | 3.774447 | 0.130477 |
| BTN3A1|75661|ES | -1.51184 | 0.113598 | 0.006772 | 1.90545 | 0.130575 |
| S100A1|7739|AP | 1.508903 | 2.803082 | 0.73483 | 10.69264 | 0.131324 |
| SECISBP2|86796|AP | -1.50726 | 0.348674 | 0.088594 | 1.372249 | 0.131743 |
| ITGB1BP1|52618|ES | 1.50701 | 12.98678 | 0.462722 | 364.4876 | 0.131808 |
| ING4|19913|AD | -1.50641 | 0.106103 | 0.00573 | 1.964878 | 0.131962 |
| RNPS1|33245|AP | 1.506211 | 4.019861 | 0.657626 | 24.57215 | 0.132013 |
| RNPS1|33248|AP | -1.50621 | 0.248765 | 0.040696 | 1.520621 | 0.132013 |
| FAM154B|32218|AT | -1.50557 | 0.670699 | 0.398749 | 1.128122 | 0.132179 |
| MBD3|46526|AD | -1.5045 | 0.216409 | 0.029466 | 1.589403 | 0.132452 |
| PLEKHM2|767|ES | 1.503433 | 2.096114 | 0.798729 | 5.500857 | 0.132727 |
| UBXN11|1256|ES | -1.50205 | 0.628965 | 0.343448 | 1.151837 | 0.133085 |
| FAM86A|33885|ES | 1.499874 | 1.639878 | 0.859223 | 3.129805 | 0.133647 |
| SVEP1|87187|AT | 1.499763 | 3.484197 | 0.681799 | 17.8053 | 0.133676 |
| TMUB2|41791|RI | 1.49956 | 12.02455 | 0.466005 | 310.2754 | 0.133728 |
| TOR2A|87656|AA | -1.49942 | 0.585932 | 0.291333 | 1.178433 | 0.133764 |
| MARK2|16543|ES | 1.497082 | 2.203608 | 0.783261 | 6.199578 | 0.134372 |
| THY1|19142|AP | 1.495269 | 20.44159 | 0.391491 | 1067.351 | 0.134844 |
| CCL28|71945|AP | -1.49331 | 0.669807 | 0.39583 | 1.133417 | 0.135355 |
| LAMP2|89999|AT | 1.492944 | 2.299611 | 0.770669 | 6.861844 | 0.135452 |
| H2AFX|19108|RI | -1.49219 | 0.068764 | 0.002043 | 2.314545 | 0.135649 |
| PNKD|57460|AP | -1.49118 | 0.501166 | 0.202137 | 1.242556 | 0.135913 |
| PNKD|57461|AP | 1.490089 | 1.99456 | 0.804356 | 4.945908 | 0.136201 |
| TNC|87357|ES | 1.489743 | 1.52084 | 0.876047 | 2.640217 | 0.136292 |
| CCL28|71944|AP | 1.489268 | 1.491204 | 0.881358 | 2.523026 | 0.136417 |
| FGF7|30551|AT | -1.48859 | 0.055346 | 0.001225 | 2.500434 | 0.136596 |
| C14orf159|28863|ES | 1.488092 | 2.311154 | 0.766709 | 6.966703 | 0.136727 |
| MX2|60658|AP | -1.48782 | 0.728181 | 0.47947 | 1.105903 | 0.136798 |
| CSMD2|1687|AT | 1.487795 | 1.828284 | 0.825729 | 4.048088 | 0.136805 |
| NIPAL3|1111|AT | 1.487408 | 2.198155 | 0.778622 | 6.205687 | 0.136907 |
| PIGX|68256|AP | -1.48592 | 0.241514 | 0.03707 | 1.573465 | 0.137301 |
| PIGX|68255|AP | 1.485891 | 4.140418 | 0.635525 | 26.97466 | 0.137308 |
| SPTAN1|87770|ES | 1.485678 | 204.7629 | 0.182877 | 229267.5 | 0.137364 |
| MX2|60659|AP | 1.48562 | 1.373726 | 0.903587 | 2.088479 | 0.13738 |
| SLC2A8|87629|ES | 1.485082 | 5.339585 | 0.585283 | 48.71345 | 0.137522 |
| SLC7A7|26621|AP | 1.484105 | 1.510144 | 0.876194 | 2.602776 | 0.137781 |
| CUL2|11225|ES | -1.48351 | 0.542389 | 0.241708 | 1.217109 | 0.137938 |
| DCAF11|26846|ES | 1.48239 | 2.358329 | 0.758508 | 7.332445 | 0.138237 |
| SRPK2|97698|ES | -1.48201 | 0.582315 | 0.284825 | 1.190523 | 0.138338 |
| IFNGR2|60408|ES | 1.48084 | 1.810609 | 0.825242 | 3.972538 | 0.138649 |
| CMC2|37714|ES | 1.478729 | 3.822567 | 0.646367 | 22.60637 | 0.139213 |
| MSR1|82776|AP | 1.478493 | 12.42899 | 0.440146 | 350.9736 | 0.139276 |
| RHOQ|53466|ES | -1.4772 | 0.022168 | 0.000142 | 3.472443 | 0.139622 |
| PLEKHG1|78149|AP | 1.476769 | 1.523222 | 0.871365 | 2.662722 | 0.139738 |
| SETD5|63100|ES | -1.47476 | 0.542284 | 0.240444 | 1.223038 | 0.140276 |
| MRPL48|92734|ES | -1.47462 | 0.578678 | 0.279695 | 1.197262 | 0.140314 |
| WDR20|29341|AT | 1.474391 | 2.896134 | 0.70454 | 11.90506 | 0.140376 |
| TCIRG1|17288|RI | -1.47361 | 0.578854 | 0.279754 | 1.197738 | 0.140586 |
| RCAN2|76415|AP | 1.47129 | 1.466489 | 0.880587 | 2.442225 | 0.141213 |
| TCF4|45610|AP | -1.46927 | 0.57768 | 0.277834 | 1.20113 | 0.14176 |
| ENTPD4|83081|AD | 1.46913 | 2.047001 | 0.787147 | 5.323288 | 0.141797 |
| ZNF396|45166|AT | -1.46897 | 0.321279 | 0.070622 | 1.461581 | 0.141842 |
| ZNF644|3732|AP | -1.46543 | 0.520271 | 0.217118 | 1.246703 | 0.142803 |
| PACS1|16987|AP | 1.463996 | 5.251639 | 0.570139 | 48.37369 | 0.143195 |
| RRP8|14161|ES | -1.46209 | 0.023285 | 0.000151 | 3.597952 | 0.143718 |
| PDCD2|78501|RI | -1.46042 | 0.466497 | 0.167659 | 1.297992 | 0.144175 |
| ARPC1A|80601|AT | -1.4593 | 0.436265 | 0.143188 | 1.329215 | 0.144482 |
| ARPC1A|80602|AT | 1.459277 | 2.292156 | 0.752312 | 6.98378 | 0.144489 |
| ESRP1|84567|ES | 1.457823 | 3.366921 | 0.658259 | 17.22143 | 0.144889 |
| STX3|16035|ES | 1.452002 | 2.782509 | 0.699069 | 11.07524 | 0.146501 |
| ITPRIP|13058|AP | 1.450347 | 3.161654 | 0.667332 | 14.97913 | 0.146962 |
| CLK3|31725|AP | -1.44961 | 0.510183 | 0.205378 | 1.267357 | 0.147167 |
| SLAMF7|8483|ES | -1.44916 | 0.219411 | 0.028205 | 1.706837 | 0.147292 |
| SPTBN1|53578|AT | -1.4478 | 0.034073 | 0.000351 | 3.304951 | 0.147673 |
| KIDINS220|52604|ES | 1.446249 | 4.936242 | 0.567156 | 42.96261 | 0.148107 |
| CSAD|21943|AP | -1.44552 | 0.518398 | 0.212705 | 1.263423 | 0.148313 |
| APP|60286|ES | 1.444815 | 3.123828 | 0.666223 | 14.64721 | 0.14851 |
| TVP23C|39353|AP | -1.44395 | 0.180102 | 0.017579 | 1.845236 | 0.148754 |
| ZNF644|3731|AP | 1.443774 | 1.905466 | 0.79413 | 4.57205 | 0.148803 |
| PDIA5|66460|ES | -1.44318 | 0.044485 | 0.000649 | 3.048307 | 0.14897 |
| GPR137|16622|AA | 1.442915 | 9.467557 | 0.446867 | 200.5844 | 0.149044 |
| CRADD|23716|AT | 1.440503 | 2.546201 | 0.713889 | 9.081444 | 0.149725 |
| ALS2CL|64463|RI | 1.440197 | 1.715101 | 0.823086 | 3.573832 | 0.149812 |
| SMG5|91222|ES | 1.438622 | 34.37736 | 0.277505 | 4258.673 | 0.150258 |
| THNSL2|54469|ME | -1.43777 | 0.3162 | 0.065813 | 1.519184 | 0.150498 |
| KCNN3|7840|AP | 1.435701 | 1.594332 | 0.843385 | 3.013919 | 0.151088 |
| VASH1|28556|AT | 1.435353 | 7.192912 | 0.486191 | 106.4148 | 0.151187 |
| BIN1|55192|ES | -1.4343 | 0.640904 | 0.348961 | 1.177091 | 0.151488 |
| GNAO1|36460|AT | -1.43371 | 0.605967 | 0.305522 | 1.201862 | 0.151656 |
| GNAO1|36461|AT | 1.433665 | 1.65023 | 0.832031 | 3.273025 | 0.151668 |
| TRMT112|1034213|ES | -1.43001 | 0.205931 | 0.023611 | 1.796097 | 0.152714 |
| MOV10|4225|ES | -1.4296 | 0.50382 | 0.196833 | 1.289592 | 0.152832 |
| VRK3|51145|AT | -1.42881 | 0.342263 | 0.078635 | 1.48971 | 0.15306 |
| NCOR2|100438|ES | -1.42789 | 0.191099 | 0.01971 | 1.85279 | 0.153324 |
| TREX2|90423|AP | -1.42755 | 0.291875 | 0.053819 | 1.582924 | 0.153423 |
| IFI27L1|29062|ES | -1.42721 | 0.225448 | 0.029147 | 1.743809 | 0.15352 |
| UPP1|79639|ES | -1.42556 | 0.482801 | 0.177414 | 1.313856 | 0.153996 |
| GALK1|43494|AT | -1.42205 | 0.496406 | 0.189068 | 1.303334 | 0.155013 |
| GALK1|43493|AT | 1.422046 | 2.014478 | 0.767263 | 5.28909 | 0.155013 |
| PTPN3|87165|AP | 1.421669 | 1.630783 | 0.830958 | 3.200467 | 0.155122 |
| ARHGAP9|22583|AP | 1.420174 | 1.684253 | 0.820248 | 3.458354 | 0.155557 |
| CD46|9652|ES | 1.419307 | 2.299724 | 0.72816 | 7.263149 | 0.15581 |
| GMPR2|26928|AD | 1.418142 | 2.547384 | 0.699593 | 9.275628 | 0.156149 |
| PLEKHG1|78148|AP | -1.41631 | 0.668008 | 0.382212 | 1.167505 | 0.156686 |
| VAMP3|509|AP | 1.415681 | 2.367174 | 0.717994 | 7.804397 | 0.156869 |
| VAMP3|510|AP | -1.41565 | 0.422454 | 0.128137 | 1.392792 | 0.156878 |
| ANKS6|87044|RI | -1.41558 | 0.220636 | 0.027224 | 1.788123 | 0.156898 |
| DNAH7|56630|AT | -1.41522 | 0.573768 | 0.265831 | 1.238416 | 0.157004 |
| TMEM106C|21404|AD | -1.41458 | 0.292706 | 0.053351 | 1.605889 | 0.157192 |
| ATG10|72684|ES | -1.41301 | 0.451064 | 0.149498 | 1.360944 | 0.157654 |
| DSN1|59313|ES | -1.4119 | 0.529678 | 0.219226 | 1.279771 | 0.15798 |
| IL32|33381|RI | 1.411271 | 2.130211 | 0.745266 | 6.088825 | 0.158165 |
| CLNK|68788|AT | 1.409983 | 1.542908 | 0.844375 | 2.81932 | 0.158545 |
| GGT1|61425|AP | 1.408972 | 1.513025 | 0.850491 | 2.691677 | 0.158843 |
| TMEM256-PLSCR3|38938|ES | 1.408738 | 2.452379 | 0.703976 | 8.543135 | 0.158913 |
| KLK11|51267|AP | 1.408432 | 2.09348 | 0.748773 | 5.85312 | 0.159003 |
| PFKP|10621|AP | 1.406502 | 2.661484 | 0.680319 | 10.41201 | 0.159575 |
| IDS|90286|AP | -1.40587 | 0.573545 | 0.264228 | 1.244963 | 0.159764 |
| IDS|90287|AP | 1.405864 | 1.74354 | 0.803236 | 3.784605 | 0.159765 |
| EDC3|31735|ES | 1.4058 | 2.287973 | 0.721614 | 7.254324 | 0.159784 |
| RFX5|7601|AP | -1.40573 | 0.514413 | 0.203612 | 1.299629 | 0.159803 |
| NAT9|43290|AA | -1.40516 | 0.140967 | 0.009168 | 2.167477 | 0.159973 |
| ZNF692|10547|AP | -1.40483 | 0.450923 | 0.148429 | 1.369889 | 0.160072 |
| PEX13|53681|AT | 1.404146 | 2.061197 | 0.751033 | 5.656924 | 0.160275 |
| PEX13|53682|AT | -1.40415 | 0.485155 | 0.176775 | 1.3315 | 0.160275 |
| PHACTR4|1384|AP | -1.40334 | 0.532765 | 0.221107 | 1.283712 | 0.160516 |
| TC2N|28884|AP | 1.402433 | 4.601074 | 0.545109 | 38.83605 | 0.160786 |
| RNASE1|26469|ES | 1.401827 | 2.650569 | 0.678341 | 10.35691 | 0.160967 |
| ANKRD13D|17156|AP | 1.399817 | 1.846072 | 0.782454 | 4.355505 | 0.161568 |
| ANKRD13D|17155|AP | -1.39981 | 0.541694 | 0.229597 | 1.27803 | 0.161569 |
| NDUFB8|12835|AD | 1.399444 | 282.6517 | 0.104279 | 766134.7 | 0.16168 |
| TMX2|15921|ES | -1.39931 | 0.044711 | 0.000576 | 3.473198 | 0.161719 |
| UBE2N|23687|AD | 1.39749 | 1.871357 | 0.77707 | 4.506643 | 0.162266 |
| CALCOCO2|42231|ES | -1.39748 | 0.543099 | 0.2307 | 1.278527 | 0.162268 |
| RACGAP1|21636|AD | -1.39678 | 0.508797 | 0.197136 | 1.313173 | 0.16248 |
| ARHGEF10L|855|AP | 1.396199 | 1.825406 | 0.784272 | 4.248662 | 0.162655 |
| ENOSF1|44469|ES | -1.39444 | 0.209738 | 0.023349 | 1.884064 | 0.163184 |
| SMPD4|95699|ES | 1.39338 | 18.69512 | 0.304006 | 1149.673 | 0.163505 |
| CLN3|35730|ES | -1.392 | 0.004802 | 2.61E-06 | 8.8318 | 0.163924 |
| SULF1|84104|AP | -1.39153 | 0.617247 | 0.312839 | 1.21786 | 0.164066 |
| UBP1|63867|ES | 1.391475 | 2.695101 | 0.666942 | 10.89086 | 0.164081 |
| D2HGDH|58422|ES | 1.391347 | 1.510252 | 0.84494 | 2.699437 | 0.16412 |
| SP110|57867|ES | -1.38959 | 0.153602 | 0.010936 | 2.157489 | 0.164652 |
| C11orf24|17301|RI | 1.389286 | 9.139354 | 0.402981 | 207.2748 | 0.164746 |
| PHACTR4|1385|AP | 1.387756 | 1.863705 | 0.7736 | 4.489913 | 0.165211 |
| AP2A2|13821|ES | 1.387379 | 16.34846 | 0.315636 | 846.7738 | 0.165326 |
| EPB41|1412|ES | 1.387234 | 2.099743 | 0.736192 | 5.988819 | 0.165371 |
| ACP5|47749|AA | 1.387058 | 2.029268 | 0.746548 | 5.515964 | 0.165424 |
| CLNK|68789|AT | -1.38686 | 0.652772 | 0.357252 | 1.192745 | 0.165484 |
| CIAPIN1|36554|AA | 1.38581 | 18.69641 | 0.297234 | 1176.029 | 0.165805 |
| SYNGR1|62299|AT | 1.38543 | 1.819778 | 0.780137 | 4.244883 | 0.165921 |
| SFSWAP|25215|ES | 1.385196 | 9.306136 | 0.396299 | 218.5326 | 0.165993 |
| UBXN11|1259|ES | -1.38358 | 0.460506 | 0.153525 | 1.381316 | 0.166488 |
| IFT20|39878|AT | -1.38086 | 0.36648 | 0.08816 | 1.523454 | 0.167323 |
| CTNND1|15948|AD | -1.38054 | 0.315065 | 0.061132 | 1.623781 | 0.167421 |
| ELMO1|79269|AD | -1.38052 | 0.570878 | 0.257574 | 1.265276 | 0.167426 |
| SAR1B|73412|AP | 1.379964 | 2.001719 | 0.746999 | 5.363972 | 0.167598 |
| EPN3|42412|ES | 1.378914 | 4.318413 | 0.539865 | 34.54323 | 0.167921 |
| PHTF1|4284|RI | 1.378053 | 1.744805 | 0.790528 | 3.851023 | 0.168187 |
| CCNL1|67377|AT | 1.377945 | 10.1315 | 0.376029 | 272.9767 | 0.16822 |
| GGCX|54288|ES | 1.376814 | 2.847297 | 0.641985 | 12.62818 | 0.16857 |
| ESRRA|16630|AP | 1.376125 | 3.46931 | 0.589922 | 20.40287 | 0.168783 |
| MEF2B|48598|ES | 1.374291 | 39.10807 | 0.209621 | 7296.227 | 0.169351 |
| THOC7|65512|ES | 1.374132 | 294.0236 | 0.088645 | 975231.8 | 0.169401 |
| LSP1|13865|AP | -1.37333 | 0.168199 | 0.013211 | 2.141415 | 0.16965 |
| ELMOD3|54248|ES | 1.372714 | 1.668199 | 0.803382 | 3.463969 | 0.169841 |
| KNOP1|93912|ES | -1.372 | 0.085203 | 0.002527 | 2.873108 | 0.170064 |
| PDLIM2|83021|AP | -1.37062 | 0.596781 | 0.285256 | 1.248518 | 0.170492 |
| DNAH7|56629|AT | 1.369916 | 1.706019 | 0.794475 | 3.663425 | 0.170713 |
| ZNF207|40205|ES | 1.365771 | 1.958336 | 0.746468 | 5.137631 | 0.172011 |
| ZNF692|10549|AP | 1.36471 | 2.165587 | 0.713888 | 6.569339 | 0.172344 |
| RBM42|49227|ES | 1.364017 | 2.902148 | 0.62782 | 13.4154 | 0.172562 |
| COL6A2|60897|AT | -1.36356 | 0.084308 | 0.00241 | 2.949904 | 0.172705 |
| FBXO21|24678|AA | -1.36292 | 0.252656 | 0.034941 | 1.826958 | 0.172907 |
| DMKN|101866|ES | 1.362285 | 2.4262 | 0.677829 | 8.684261 | 0.173108 |
| ERAP2|72873|ES | -1.3609 | 0.077573 | 0.001953 | 3.081395 | 0.173546 |
| MLLT4|78456|ES | 1.3608 | 1.657328 | 0.80056 | 3.43102 | 0.173577 |
| PTCH1|86953|AP | -1.35992 | 0.454694 | 0.14602 | 1.415878 | 0.173855 |
| PNOC|83207|AP | 1.35829 | 2.380524 | 0.681 | 8.321425 | 0.174372 |
| PRRX1|8968|AT | -1.35723 | 0.232957 | 0.028416 | 1.909803 | 0.174709 |
| KIAA1522|1632|AP | -1.35683 | 0.474159 | 0.161358 | 1.393339 | 0.174835 |
| MYO1B|56607|ES | -1.35654 | 0.599157 | 0.285841 | 1.255905 | 0.174929 |
| MAPK8IP1|15515|AP | -1.35468 | 0.559774 | 0.241789 | 1.295954 | 0.175519 |
| C2CD2|60691|AP | -1.35444 | 0.353322 | 0.078404 | 1.592207 | 0.175597 |
| MTMR10|29789|RI | -1.3537 | 0.506675 | 0.18933 | 1.355935 | 0.175832 |
| IGFLR1|49256|AP | -1.3535 | 0.60215 | 0.288869 | 1.255187 | 0.175896 |
| RBPMS|83289|AT | -1.35214 | 0.375653 | 0.090871 | 1.552907 | 0.176331 |
| RALY|59017|ES | 1.351915 | 3.780319 | 0.549852 | 25.99027 | 0.176402 |
| TTC7A|53483|AP | -1.35133 | 0.628528 | 0.32049 | 1.232635 | 0.176591 |
| TTC7A|53482|AP | 1.351314 | 1.591011 | 0.811267 | 3.120202 | 0.176595 |
| TCEAL1|89762|AP | -1.35084 | 0.305206 | 0.054548 | 1.707695 | 0.176748 |
| ENDOV|44050|AP | 1.348438 | 1.848948 | 0.756742 | 4.517533 | 0.177518 |
| ENDOV|44051|AP | -1.34773 | 0.541032 | 0.22144 | 1.321874 | 0.177747 |
| NR1H3|114107|ES | -1.34725 | 0.552715 | 0.23329 | 1.309504 | 0.177899 |
| OSMR|71849|AT | -1.34598 | 0.518035 | 0.198801 | 1.349894 | 0.178311 |
| OSMR|71850|AT | 1.345962 | 1.930359 | 0.740794 | 5.030127 | 0.178315 |
| TMUB2|41821|ES | 1.345538 | 1.695172 | 0.785836 | 3.656755 | 0.178452 |
| MDH1|53732|AP | 1.34362 | 2034.081 | 0.030366 | 1.36E+08 | 0.179071 |
| TGIF1|44510|RI | 1.340912 | 58.65903 | 0.152623 | 22544.92 | 0.179949 |
| TTC28|61523|ES | -1.33859 | 0.620655 | 0.308703 | 1.247841 | 0.180705 |
| INADL|3241|ES | -1.33835 | 0.532282 | 0.211392 | 1.340282 | 0.180781 |
| MYO10|71601|AP | -1.33641 | 0.22485 | 0.025199 | 2.006312 | 0.181415 |
| PDLIM2|83022|AP | 1.335566 | 1.648338 | 0.79164 | 3.432138 | 0.181691 |
| NOL6|86114|AP | -1.33492 | 0.351182 | 0.075556 | 1.632281 | 0.181903 |
| SULF1|84103|AP | 1.334348 | 1.587091 | 0.80528 | 3.127926 | 0.18209 |
| ESYT2|82534|AP | 1.333294 | 9.244313 | 0.351579 | 243.0673 | 0.182435 |
| RGS12|68636|AP | -1.33302 | 0.540079 | 0.218315 | 1.336076 | 0.182526 |
| MRPL55|10174|ES | 1.332884 | 2.63679 | 0.633719 | 10.9712 | 0.18257 |
| MAN2C1|31868|ES | 1.33265 | 26.01321 | 0.21569 | 3137.316 | 0.182647 |
| THTPA|26757|AD | -1.33163 | 0.229713 | 0.02636 | 2.001816 | 0.182981 |
| FBXO38|73980|ES | 1.331004 | 2.115985 | 0.701747 | 6.380354 | 0.183188 |
| RFNG|44267|AP | 1.330486 | 5.062742 | 0.464239 | 55.21151 | 0.183358 |
| CD68|264264|ES | -1.32944 | 0.372382 | 0.086798 | 1.597603 | 0.183702 |
| KBTBD4|15776|RI | 1.328408 | 2.097624 | 0.703142 | 6.257664 | 0.184044 |
| ANKRD12|44597|ES | -1.32776 | 0.599302 | 0.281461 | 1.276065 | 0.184258 |
| GPATCH2|9839|AT | 1.327583 | 1.926541 | 0.731726 | 5.07233 | 0.184316 |
| GPATCH2|9838|AT | -1.32758 | 0.519065 | 0.197147 | 1.366636 | 0.184317 |
| NIPAL3|1109|AT | -1.32663 | 0.478058 | 0.160673 | 1.422387 | 0.184633 |
| PAM|72891|ES | 1.326514 | 1.680036 | 0.780555 | 3.61604 | 0.184669 |
| ITGB1BP1|52617|AA | 1.326295 | 1.567206 | 0.806815 | 3.044235 | 0.184742 |
| ZNF177|47289|AP | -1.32418 | 0.567978 | 0.245872 | 1.312061 | 0.185443 |
| MARCH7|55702|ES | 1.321534 | 7.589369 | 0.375643 | 153.3333 | 0.186323 |
| SEC14L2|61736|AT | -1.32035 | 0.459859 | 0.14515 | 1.456911 | 0.186718 |
| SEC14L2|61738|AT | 1.320341 | 2.174557 | 0.68638 | 6.88933 | 0.186721 |
| ERMAP|2124|RI | -1.3201 | 0.626164 | 0.312485 | 1.254722 | 0.186802 |
| STX2|25202|ES | 1.31954 | 1.542972 | 0.810182 | 2.938553 | 0.186989 |
| KCTD17|62079|ES | 1.319106 | 1.737548 | 0.764596 | 3.948585 | 0.187134 |
| BOLA1|7408|ES | -1.3188 | 0.542959 | 0.219071 | 1.345702 | 0.187236 |
| WNK1|19611|AP | 1.317004 | 16.64991 | 0.253342 | 1094.248 | 0.187837 |
| ANXA8L2|11455|RI | -1.31686 | 0.171093 | 0.012359 | 2.368444 | 0.187887 |
| GAS7|39260|AP | 1.316511 | 1.793986 | 0.751527 | 4.282463 | 0.188003 |
| ZNF527|49507|AT | -1.31479 | 0.61195 | 0.294288 | 1.272506 | 0.188581 |
| ARL6IP4|25038|AD | 1.313398 | 6.810978 | 0.388887 | 119.2876 | 0.189049 |
| ACTG2|53996|AT | -1.31194 | 0.002302 | 2.64E-07 | 20.08944 | 0.189539 |
| SLC27A1|48308|AP | 1.310313 | 1.584507 | 0.795963 | 3.154244 | 0.19009 |
| ARL2|16727|ES | -1.31007 | 0.00729 | 4.63E-06 | 11.48812 | 0.190171 |
| APBB3|73680|AD | -1.30868 | 0.670034 | 0.367831 | 1.220521 | 0.190642 |
| MFF|57805|ES | 1.308275 | 3.091383 | 0.569955 | 16.76736 | 0.19078 |
| ST3GAL2|37384|AP | 1.307631 | 2.395408 | 0.646756 | 8.871937 | 0.190999 |
| SEPT6|89975|ES | -1.30717 | 0.55439 | 0.228925 | 1.342573 | 0.191156 |
| TSPAN11|20954|AT | -1.30662 | 0.612447 | 0.293538 | 1.277828 | 0.191343 |
| RASSF5|9586|AP | -1.30625 | 0.714339 | 0.431216 | 1.18335 | 0.191466 |
| ELN|80051|ES | 1.306089 | 4.311058 | 0.481177 | 38.6245 | 0.191522 |
| RASSF5|9585|AP | 1.303259 | 1.399099 | 0.844321 | 2.318405 | 0.192486 |
| MPV17|52961|AP | 1.302676 | 483.2558 | 0.044223 | 5280817 | 0.192685 |
| RBM41|89818|ES | -1.30224 | 0.606407 | 0.285632 | 1.287422 | 0.192836 |
| ZNF527|49506|AT | 1.302052 | 1.626137 | 0.782176 | 3.380722 | 0.192899 |
| LTC4S|74925|ES | -1.30179 | 0.001424 | 7.38E-08 | 27.48891 | 0.192988 |
| ZDHHC4|78754|ES | 1.301758 | 1.569891 | 0.796091 | 3.095826 | 0.192999 |
| CCDC107|86260|RI | 1.301424 | 3.449182 | 0.534451 | 22.25998 | 0.193113 |
| NUP214|87926|AA | -1.30015 | 0.292742 | 0.045943 | 1.865319 | 0.193549 |
| MFF|57815|ES | 1.298746 | 1.943833 | 0.712915 | 5.300049 | 0.194031 |
| NUPL1|25501|ES | -1.29838 | 0.377957 | 0.087011 | 1.641767 | 0.194156 |
| IQSEC2|89210|AP | -1.29781 | 0.56014 | 0.233439 | 1.344064 | 0.194351 |
| PLGLB1|54462|AT | 1.297803 | 2.00475 | 0.701268 | 5.731081 | 0.194355 |
| C1orf63|1140|AP | -1.29685 | 0.289114 | 0.044317 | 1.886108 | 0.194681 |
| NBL1|912|AP | -1.2963 | 0.003198 | 5.40E-07 | 18.94167 | 0.194872 |
| ZC3HAV1|81940|AT | 1.296053 | 2.234789 | 0.662371 | 7.540002 | 0.194957 |
| CHTF8|106054|ES | 1.294494 | 5.376661 | 0.421173 | 68.63805 | 0.195495 |
| ZNF385A|22176|AP | -1.29354 | 0.705567 | 0.415953 | 1.196828 | 0.195823 |
| TMEFF1|87085|AP | -1.29294 | 0.561055 | 0.233628 | 1.34737 | 0.196031 |
| MYO1G|79577|AT | -1.29217 | 0.146322 | 0.00793 | 2.700036 | 0.196299 |
| HOXC6|22115|AP | -1.29114 | 0.694359 | 0.399124 | 1.207982 | 0.196654 |
| PRKD2|50579|AP | 1.290266 | 2.79993 | 0.586021 | 13.37769 | 0.196958 |
| LIPG|45485|AP | 1.289896 | 1.884315 | 0.719556 | 4.93449 | 0.197087 |
| LETMD1|21763|ES | 1.289367 | 1.970254 | 0.70278 | 5.523637 | 0.197271 |
| SYNJ2|78244|AP | 1.288322 | 1.691564 | 0.760302 | 3.763488 | 0.197634 |
| FAM195A|32927|ES | 1.287737 | 2.400311 | 0.633129 | 9.10003 | 0.197837 |
| KIF13A|75457|ES | -1.28738 | 0.525662 | 0.197469 | 1.399313 | 0.197962 |
| C1orf162|4170|AA | 1.286388 | 3.154114 | 0.547997 | 18.15417 | 0.198308 |
| MFSD7|68395|ES | 1.285891 | 1.582421 | 0.786165 | 3.185152 | 0.198481 |
| ATP9B|46230|AT | -1.28576 | 0.431835 | 0.120063 | 1.553193 | 0.198527 |
| TMEFF1|87084|AP | 1.284467 | 1.77323 | 0.739904 | 4.249669 | 0.198979 |
| EHF|14957|AP | 1.28332 | 1.625967 | 0.773907 | 3.416129 | 0.19938 |
| CHODL|60244|AP | -1.2831 | 0.66449 | 0.355906 | 1.240628 | 0.199458 |
| RFX5|7603|AP | 1.282086 | 1.957021 | 0.701172 | 5.462183 | 0.199812 |
| KLK8|95349|ES | -1.28196 | 0.570635 | 0.242024 | 1.34542 | 0.199857 |
| RNF149|54740|AT | -1.2809 | 0.317091 | 0.054692 | 1.838416 | 0.200228 |
| MLXIPL|79992|AA | 1.28082 | 2.096209 | 0.675401 | 6.505898 | 0.200257 |
| RNF149|54741|AT | 1.2808 | 3.153363 | 0.543898 | 18.28228 | 0.200264 |
| RTN1|27756|AP | 1.28003 | 1.427143 | 0.827845 | 2.46029 | 0.200535 |
| ZNF630|88949|AP | -1.27978 | 0.43644 | 0.122595 | 1.553734 | 0.200624 |
| PDCD2|78498|AT | 1.277932 | 2.498263 | 0.613452 | 10.1741 | 0.201274 |
| PAM|72890|ES | 1.2776 | 6.525548 | 0.36721 | 115.9631 | 0.201391 |
| PANK2|58614|AD | -1.27715 | 0.402794 | 0.099777 | 1.626058 | 0.201548 |
| CARKD|26256|RI | 1.275993 | 2.38409 | 0.627687 | 9.055281 | 0.201958 |
| TMEM251|29025|AD | 1.275409 | 2.155807 | 0.662125 | 7.019067 | 0.202165 |
| EHBP1|53718|ES | 1.274806 | 1.757769 | 0.738486 | 4.1839 | 0.202378 |
| LMNA|8173|AP | 1.274359 | 1.405677 | 0.832603 | 2.373193 | 0.202536 |
| UBALD1|33778|AD | 1.274104 | 45.29724 | 0.128388 | 15981.56 | 0.202626 |
| MRPL55|10175|ES | 1.273387 | 1.877463 | 0.712029 | 4.950457 | 0.202881 |
| DGCR6L|61146|ES | -1.27326 | 0.113749 | 0.004006 | 3.229613 | 0.202925 |
| WDR6|64794|RI | 1.271418 | 1.769492 | 0.734135 | 4.265023 | 0.20358 |
| UBXN11|101231|ES | -1.27132 | 0.605182 | 0.279013 | 1.312645 | 0.203615 |
| ALS2|56918|ES | -1.26992 | 0.542322 | 0.21092 | 1.394431 | 0.204112 |
| FBXW7|70846|AP | -1.26833 | 0.541421 | 0.20978 | 1.397353 | 0.20468 |
| FAM63A|7539|AA | 1.267755 | 1.927143 | 0.69893 | 5.31367 | 0.204885 |
| SSFA2|56439|AP | 1.267016 | 1.781715 | 0.729144 | 4.353749 | 0.20515 |
| MEF2C|72749|AP | -1.26699 | 0.620556 | 0.296637 | 1.298185 | 0.205158 |
| DAP3|8123|AD | -1.26596 | 0.28637 | 0.041318 | 1.984794 | 0.205528 |
| LYRM1|34412|ES | 1.265841 | 1.682528 | 0.751785 | 3.765571 | 0.20557 |
| NAB2|22516|ES | 1.265465 | 6.584601 | 0.355454 | 121.9763 | 0.205705 |
| SP140L|57885|AP | -1.26494 | 0.652925 | 0.337288 | 1.263935 | 0.205894 |
| PEX11A|32438|ES | -1.26446 | 0.48769 | 0.160233 | 1.484346 | 0.206067 |
| PPP1R7|58339|AD | -1.26439 | 0.6121 | 0.286004 | 1.310008 | 0.206089 |
| TBC1D3F|40555|ES | -1.2626 | 0.299613 | 0.046133 | 1.945831 | 0.206731 |
| SENP7|65946|ES | -1.26218 | 0.458408 | 0.136531 | 1.539122 | 0.206884 |
| EBNA1BP2|2145|AP | 1.260769 | 21.88942 | 0.180608 | 2652.97 | 0.207392 |
| PER1|39093|AT | -1.25726 | 0.209103 | 0.018233 | 2.398064 | 0.208659 |
| GNAS|59995|AP | -1.25698 | 0.123596 | 0.004745 | 3.219628 | 0.208759 |
| TBC1D8B|89806|AT | -1.25512 | 0.252734 | 0.029504 | 2.164954 | 0.209435 |
| HHLA3|3409|AD | 1.253942 | 2.96152 | 0.542647 | 16.16263 | 0.209863 |
| RCAN2|76416|AP | -1.25335 | 0.714116 | 0.42179 | 1.209042 | 0.210077 |
| GYG2|88414|ES | -1.25324 | 0.169127 | 0.0105 | 2.724126 | 0.210119 |
| PSPH|79781|AA | -1.25167 | 0.364215 | 0.074902 | 1.771008 | 0.210691 |
| ABCC5|67824|AD | -1.25103 | 0.686961 | 0.381468 | 1.237105 | 0.210922 |
| EMC10|51201|ES | -1.2502 | 0.432432 | 0.116182 | 1.609516 | 0.211225 |
| KBTBD4|15779|AD | -1.24951 | 0.473204 | 0.14633 | 1.530256 | 0.211479 |
| MAGI3|4272|ES | -1.24903 | 0.666596 | 0.352753 | 1.259664 | 0.211654 |
| BBIP1|13098|ES | 1.248208 | 1.55956 | 0.77615 | 3.133707 | 0.211955 |
| DCAF8|8446|AD | 1.247922 | 2.937369 | 0.540743 | 15.95607 | 0.21206 |
| MYO9B|107862|ES | -1.24739 | 0.195199 | 0.014984 | 2.542821 | 0.212255 |
| HHLA3|3402|ES | 1.243788 | 2.252112 | 0.626582 | 8.094721 | 0.213577 |
| PPFIBP1|20888|AT | 1.243506 | 8.323144 | 0.294963 | 234.8593 | 0.213682 |
| STX4|36222|AD | 1.243372 | 81.28531 | 0.079287 | 83333.61 | 0.213731 |
| CTNND1|15987|ES | -1.24154 | 0.527322 | 0.192012 | 1.44818 | 0.214406 |
| ABCC5|67823|AA | -1.2392 | 0.609285 | 0.278282 | 1.334002 | 0.215272 |
| SAYSD1|76036|AP | 1.238981 | 1.974226 | 0.673137 | 5.790153 | 0.215353 |
| SAYSD1|76037|AP | -1.23893 | 0.506543 | 0.172712 | 1.485624 | 0.215373 |
| BBOX1|14747|AP | -1.23886 | 0.54993 | 0.213529 | 1.416313 | 0.215398 |
| GOLGA2|87727|ES | 1.238189 | 1.88015 | 0.692094 | 5.107635 | 0.215646 |
| PTPN6|20022|AP | 1.237664 | 1.924881 | 0.682374 | 5.42982 | 0.21584 |
| PTPN6|20023|AP | -1.23757 | 0.519539 | 0.184178 | 1.465542 | 0.215874 |
| PLEKHO1|7426|AP | 1.237489 | 107.5899 | 0.065133 | 177721.5 | 0.215906 |
| TMPO|23846|ES | -1.23709 | 0.151475 | 0.007616 | 3.012671 | 0.216052 |
| TMEM63B|76352|AP | -1.23653 | 0.643623 | 0.320111 | 1.294082 | 0.216263 |
| KIAA0319L|1718|AP | 1.235656 | 1.859595 | 0.695143 | 4.97465 | 0.216586 |
| MARCH8|11362|ES | 1.233625 | 1.572648 | 0.765996 | 3.228768 | 0.217343 |
| ALAS1|65183|ES | -1.23269 | 0.494859 | 0.161699 | 1.514448 | 0.217693 |
| KIAA0319L|1719|AP | -1.23244 | 0.522828 | 0.186407 | 1.466413 | 0.217785 |
| MAFK|78581|AP | -1.23224 | 0.550154 | 0.21267 | 1.423187 | 0.217859 |
| ZNF385A|22177|AP | 1.232227 | 1.3789 | 0.827168 | 2.298644 | 0.217864 |
| TRAPPC5|47137|AD | -1.23203 | 0.402397 | 0.094564 | 1.712315 | 0.217936 |
| PPHLN1|21211|AP | 1.231799 | 16.90031 | 0.187994 | 1519.309 | 0.218024 |
| SLC37A2|19257|ES | 1.231359 | 2.509581 | 0.580167 | 10.8555 | 0.218189 |
| TBC1D16|44011|AT | 1.230836 | 3.668925 | 0.462995 | 29.0738 | 0.218384 |
| DMPK|50520|AP | 1.23078 | 1.965993 | 0.669985 | 5.768979 | 0.218405 |
| CALHM2|13017|AA | -1.23076 | 0.37024 | 0.076086 | 1.80162 | 0.218411 |
| LRCH3|68325|ES | -1.23065 | 0.585465 | 0.249584 | 1.373365 | 0.218455 |
| MLH1|63950|ES | -1.23063 | 0.614681 | 0.283167 | 1.334309 | 0.218461 |
| TOR2A|87658|ES | -1.23042 | 0.317912 | 0.051229 | 1.97285 | 0.21854 |
| MICAL1|77198|AP | -1.23031 | 0.56289 | 0.225336 | 1.406098 | 0.218582 |
| IL32|33439|AD | -1.23025 | 0.476501 | 0.146276 | 1.552229 | 0.218605 |
| MON1A|64928|ES | -1.22982 | 0.477797 | 0.14725 | 1.550359 | 0.218764 |
| RAC2|62103|AD | -1.22982 | 0.000608 | 4.55E-09 | 81.19516 | 0.218766 |
| PLD3|49891|ES | -1.22897 | 0.408421 | 0.097927 | 1.703392 | 0.219084 |
| AKR1C2|10651|AT | 1.228026 | 1.761455 | 0.713598 | 4.347998 | 0.219437 |
| DOCK7|3256|ES | -1.22782 | 0.591407 | 0.255711 | 1.367801 | 0.219514 |
| MAFK|78580|AP | 1.225965 | 1.811978 | 0.700553 | 4.686672 | 0.220212 |
| KIAA1522|1631|AP | 1.225616 | 1.976071 | 0.664913 | 5.872729 | 0.220343 |
| FOSL2|53057|AP | 1.225118 | 5312.709 | 0.005828 | 4.84E+09 | 0.220531 |
| TNC|87358|ES | 1.224801 | 1.366948 | 0.828929 | 2.254171 | 0.22065 |
| WDPCP|53725|AP | -1.22465 | 0.401932 | 0.09346 | 1.728543 | 0.220709 |
| RAC1|78720|ES | -1.22355 | 0.433761 | 0.113809 | 1.653198 | 0.221121 |
| ADAMTSL2|88071|AP | 1.22346 | 1.448871 | 0.79995 | 2.6242 | 0.221156 |
| C5orf24|73432|RI | -1.22341 | 0.181875 | 0.011855 | 2.790341 | 0.221176 |
| ZNF618|87298|ES | -1.22297 | 0.521928 | 0.184096 | 1.47971 | 0.221343 |
| SLC25A35|39149|AT | 1.222416 | 2.409036 | 0.588321 | 9.864442 | 0.22155 |
| RAB28|68792|ES | 1.22128 | 2.0809 | 0.641959 | 6.745202 | 0.22198 |
| TMEM134|486171|ES | 1.22071 | 3.676916 | 0.454514 | 29.74544 | 0.222196 |
| KLK11|51268|AP | -1.21992 | 0.532156 | 0.193146 | 1.466199 | 0.222494 |
| MAPKAP1|87587|ES | -1.21906 | 0.055096 | 0.000521 | 5.822549 | 0.222823 |
| SEC31A|69731|ES | -1.2185 | 0.441097 | 0.11824 | 1.645525 | 0.223035 |
| WNK1|19617|ES | -1.21825 | 0.620087 | 0.287437 | 1.337711 | 0.223129 |
| DMPK|50519|AP | -1.21477 | 0.513103 | 0.174838 | 1.50582 | 0.224453 |
| PRX|49900|RI | -1.21393 | 0.643436 | 0.315736 | 1.311252 | 0.224776 |
| MEF2C|72747|AP | 1.213051 | 1.578592 | 0.754952 | 3.30081 | 0.22511 |
| NFIB|85886|ES | 1.211968 | 1.651295 | 0.733777 | 3.716082 | 0.225525 |
| TNPO2|47846|AP | -1.21176 | 0.526955 | 0.186962 | 1.485228 | 0.225606 |
| ENTPD1|12653|AP | -1.21136 | 0.629848 | 0.298127 | 1.330667 | 0.225757 |
| TM2D3|32765|AP | -1.21135 | 0.003658 | 4.17E-07 | 32.05972 | 0.225763 |
| COQ4|87735|AT | -1.21132 | 0.438298 | 0.115382 | 1.664953 | 0.225774 |
| PHF11|25894|ES | -1.21037 | 0.161048 | 0.008371 | 3.098438 | 0.226138 |
| MED22|88025|AP | 1.210017 | 8.920111 | 0.257618 | 308.8614 | 0.226273 |
| AFMID|94696|ES | 1.209695 | 2.397879 | 0.581334 | 9.890735 | 0.226396 |
| CCDC90B|18087|ES | 1.209379 | 1.546684 | 0.76287 | 3.135831 | 0.226517 |
| GSTZ1|28584|AP | -1.20878 | 0.096975 | 0.002206 | 4.263081 | 0.226746 |
| ATXN2L|35847|AA | 1.207289 | 1.731072 | 0.710271 | 4.218968 | 0.227321 |
| ZNF333|48020|AT | 1.207145 | 2.05169 | 0.638787 | 6.589731 | 0.227376 |
| MBD3|46524|AP | -1.20593 | 0.452189 | 0.124487 | 1.642549 | 0.227844 |
| MBD3|46523|AP | 1.205843 | 2.211339 | 0.608774 | 8.032567 | 0.227878 |
| PRDX5|16639|ES | 1.205821 | 173.2198 | 0.039805 | 753799.3 | 0.227886 |
| PAXIP1|82431|ES | 1.205206 | 1.800121 | 0.692019 | 4.682582 | 0.228124 |
| MIF4GD|43418|ES | 1.205005 | 4.191986 | 0.40742 | 43.13181 | 0.228201 |
| IFNLR1|1094|AT | 1.203309 | 1.473753 | 0.783597 | 2.771767 | 0.228857 |
| ARFIP2|14139|ES | -1.20273 | 0.056615 | 0.000526 | 6.097448 | 0.22908 |
| CD300A|43254|ES | -1.20168 | 0.333124 | 0.055458 | 2.000986 | 0.229487 |
| SSFA2|56438|AP | -1.20113 | 0.577873 | 0.236155 | 1.414057 | 0.229701 |
| ARHGEF1|50098|AP | 1.20103 | 1.666754 | 0.7241 | 3.836581 | 0.22974 |
| RANBP3|46965|ES | 1.200412 | 1.738911 | 0.704638 | 4.291297 | 0.229979 |
| PCGF2|40583|AP | -1.19999 | 0.473253 | 0.13945 | 1.60608 | 0.230142 |
| MICAL1|77197|AP | 1.199514 | 1.751585 | 0.700928 | 4.377125 | 0.230328 |
| GYLTL1B|15530|AT | -1.19939 | 0.089706 | 0.001744 | 4.613719 | 0.230377 |
| ANO1|17387|ES | 1.198308 | 1.397394 | 0.808414 | 2.415482 | 0.230797 |
| SLC26A6|64721|AP | 1.197255 | 1.527453 | 0.76349 | 3.055852 | 0.231207 |
| PML|31664|ES | -1.1964 | 0.28111 | 0.035157 | 2.247681 | 0.231539 |
| CCR10|41106|AP | 1.195472 | 1.422436 | 0.798247 | 2.534708 | 0.231903 |
| NBPF15|7397|ES | -1.19483 | 0.629845 | 0.295054 | 1.344512 | 0.232153 |
| PQLC1|46260|ES | -1.19475 | 0.341422 | 0.058569 | 1.990291 | 0.232184 |
| MXI1|13079|AP | 1.194404 | 1.625927 | 0.732308 | 3.610012 | 0.23232 |
| ECHDC2|90971|ES | -1.19339 | 0.652013 | 0.322997 | 1.316173 | 0.232717 |
| PXMP4|59012|ES | -1.19248 | 0.274808 | 0.032886 | 2.296367 | 0.233072 |
| PPM1N|50469|AP | 1.192079 | 1.678135 | 0.716434 | 3.930767 | 0.23323 |
| STK16|57666|ES | 1.190817 | 4.163441 | 0.398012 | 43.55204 | 0.233725 |
| PPFIBP2|14203|AP | 1.19044 | 1.374708 | 0.814063 | 2.321471 | 0.233874 |
| TBC1D20|58457|RI | -1.19011 | 0.123352 | 0.00393 | 3.871804 | 0.234002 |
| CENPM|62467|AP | -1.18935 | 0.492503 | 0.153292 | 1.582333 | 0.234303 |
| PPP1R1A|22198|ES | -1.18866 | 0.286958 | 0.036629 | 2.248077 | 0.234572 |
| TMEM63B|76351|AP | 1.187831 | 1.527157 | 0.759397 | 3.07113 | 0.2349 |
| ADAMTSL1|85946|AT | -1.18733 | 0.625569 | 0.28839 | 1.356969 | 0.235097 |
| ARHGAP22|11484|AP | -1.18732 | 0.670152 | 0.346121 | 1.297532 | 0.235103 |
| CBX7|62286|AA | -1.18709 | 0.430804 | 0.107263 | 1.730255 | 0.235194 |
| PICALM|18172|ES | -1.18677 | 0.585871 | 0.242284 | 1.416705 | 0.235318 |
| CAMK2D|70419|AA | -1.18652 | 0.573019 | 0.2284 | 1.43761 | 0.235418 |
| TRMT1|47919|ES | 1.186458 | 83.95765 | 0.05567 | 126619.9 | 0.235441 |
| LZIC|587|AP | -1.18505 | 0.518147 | 0.174656 | 1.537169 | 0.235998 |
| LZIC|586|AP | 1.183401 | 1.928201 | 0.649949 | 5.720381 | 0.23665 |
| SUMO3|60835|AT | 1.182614 | 126.7731 | 0.041462 | 387620.7 | 0.236962 |
| GAL3ST4|80915|ES | 1.18224 | 11.82944 | 0.196862 | 710.8303 | 0.23711 |
| ZDHHC14|78241|AA | -1.18197 | 0.567066 | 0.221363 | 1.452653 | 0.237216 |
| SENP5|68262|ES | -1.18081 | 0.30213 | 0.041437 | 2.202899 | 0.237679 |
| BAZ1A|27174|ES | -1.18011 | 0.516374 | 0.172284 | 1.547689 | 0.237958 |
| HOXC6|22116|AP | 1.178054 | 1.396908 | 0.801028 | 2.43606 | 0.238775 |
| BCS1L|57528|RI | 1.17789 | 1.4644 | 0.776262 | 2.762558 | 0.23884 |
| PARP8|71970|AP | 1.17731 | 80.62814 | 0.054026 | 120329 | 0.239072 |
| CYGB|43591|AP | 1.177221 | 1.512757 | 0.759399 | 3.013479 | 0.239107 |
| EGFLAM|71837|AP | -1.17693 | 0.716333 | 0.410994 | 1.248518 | 0.239223 |
| LONRF1|82748|AP | 1.176448 | 2.41149 | 0.556413 | 10.45139 | 0.239416 |
| KIAA0141|73836|RI | -1.17138 | 0.256046 | 0.0262 | 2.502233 | 0.241447 |
| LYPLA2|1073|RI | -1.17132 | 0.407199 | 0.090552 | 1.831117 | 0.241471 |
| FAM195A|32926|ES | -1.17128 | 0.062296 | 0.000599 | 6.482688 | 0.241486 |
| RRP8|14160|ES | -1.17029 | 0.599206 | 0.254137 | 1.412813 | 0.241885 |
| PRKCSH|47706|AP | 1.170036 | 2.493059 | 0.539701 | 11.51628 | 0.241987 |
| TRA2B|68038|ES | 1.16957 | 13.82535 | 0.169485 | 1127.768 | 0.242174 |
| TCF12|30789|ES | -1.16817 | 0.634322 | 0.295545 | 1.361433 | 0.242739 |
| TAF15|40340|ES | -1.16801 | 0.084104 | 0.00132 | 5.358123 | 0.242803 |
| APTX|86080|AA | -1.16705 | 0.554511 | 0.205981 | 1.492772 | 0.243192 |
| LRRC32|17898|AP | -1.16453 | 0.579319 | 0.231152 | 1.451904 | 0.244207 |
| APEX1|26450|AD | -1.16453 | 0.006038 | 1.11E-06 | 32.79195 | 0.244207 |
| SMARCB1|61329|AD | -1.16326 | 0.343161 | 0.056606 | 2.080339 | 0.244725 |
| MUC1|7967|ES | 1.163234 | 1.533458 | 0.746154 | 3.151483 | 0.244735 |
| RCE1|17133|AA | -1.16321 | 0.217416 | 0.016621 | 2.843994 | 0.244744 |
| RPS24|12296|ES | 1.162883 | 1.686674 | 0.698851 | 4.07078 | 0.244877 |
| PAPOLA|29205|ES | 1.16276 | 2.108694 | 0.599587 | 7.416095 | 0.244927 |
| LRRC32|17897|AP | 1.162221 | 1.7246 | 0.687921 | 4.323529 | 0.245146 |
| TMCO4|917|ES | -1.16145 | 0.563328 | 0.21388 | 1.483726 | 0.245457 |
| IRAK4|21269|AD | -1.16086 | 0.72674 | 0.423969 | 1.245727 | 0.245699 |
| SULF2|59730|AD | -1.15979 | 0.596971 | 0.24965 | 1.427499 | 0.246134 |
| MIF4GD|43420|ES | 1.159278 | 115.6735 | 0.037581 | 356036.5 | 0.246343 |
| ANKMY1|58250|AT | -1.15916 | 0.541454 | 0.191892 | 1.527801 | 0.246389 |
| FGD3|86890|AP | 1.158888 | 1.40096 | 0.792107 | 2.477806 | 0.246502 |
| MAST4|72279|AP | -1.15869 | 0.711036 | 0.399356 | 1.265968 | 0.246584 |
| KIAA0930|62646|AP | 1.158435 | 3.839727 | 0.394202 | 37.40093 | 0.246687 |
| DLGAP4|59282|AP | -1.15807 | 0.00487 | 5.94E-07 | 39.92708 | 0.246835 |
| ZNF143|14318|AP | 1.157806 | 1.636971 | 0.710734 | 3.770292 | 0.246943 |
| TMEM91|50052|RI | -1.15525 | 0.712001 | 0.400133 | 1.266943 | 0.247987 |
| PKP4|55680|ES | -1.15501 | 0.548831 | 0.198284 | 1.519112 | 0.248085 |
| DNMT3A|52856|AT | -1.15456 | 0.465069 | 0.126794 | 1.705831 | 0.248271 |
| NPRL3|32807|ES | -1.15389 | 0.200805 | 0.013137 | 3.069477 | 0.248546 |
| GRB10|79711|AP | -1.15372 | 0.52287 | 0.173779 | 1.573224 | 0.248613 |
| FNIP1|73237|ES | -1.15319 | 0.469124 | 0.1296 | 1.698123 | 0.248834 |
| POMGNT1|2784|RI | 1.152504 | 33.22188 | 0.085915 | 12846.36 | 0.249114 |
| FKBP7|56171|ES | -1.15174 | 0.700495 | 0.382229 | 1.283768 | 0.24943 |
| SARS2|49730|ES | 1.151079 | 2023.422 | 0.004751 | 8.62E+08 | 0.2497 |
| HEXA|31550|ES | -1.1509 | 0.050427 | 0.000311 | 8.165876 | 0.249773 |
| MAFG|44238|AP | 1.150785 | 1.801419 | 0.661094 | 4.908693 | 0.249821 |
| ALDH3B1|17270|AP | 1.150445 | 1.496617 | 0.752978 | 2.974673 | 0.24996 |
| FGFR2|13318|ES | -1.15031 | 0.359733 | 0.063014 | 2.053636 | 0.250015 |
| MCFD2|53471|AP | -1.15021 | 0.327797 | 0.049 | 2.192873 | 0.250055 |
| REEP2|73546|AA | 1.149567 | 2.743985 | 0.490861 | 15.33927 | 0.250322 |
| ABLIM1|13208|AA | -1.14955 | 0.624612 | 0.279982 | 1.393446 | 0.250327 |
| CUL1|82148|AP | -1.14947 | 0.558533 | 0.206891 | 1.507843 | 0.250362 |
| COMMD5|85671|AP | 1.147785 | 2.375033 | 0.542218 | 10.40316 | 0.251057 |
| COMMD5|85672|AP | -1.14776 | 0.421055 | 0.096127 | 1.844306 | 0.251067 |
| NFE2L1|42160|ES | 1.147301 | 2.376206 | 0.541691 | 10.42357 | 0.251257 |
| ALG3|116215|ES | -1.14635 | 0.43589 | 0.105391 | 1.802812 | 0.251651 |
| CHORDC1|18267|RI | -1.14588 | 0.715987 | 0.404323 | 1.267893 | 0.251847 |
| RAB31|44617|ES | -1.14543 | 0.001614 | 2.69E-08 | 96.71749 | 0.252031 |
| ALDH3B1|17271|AP | -1.14522 | 0.668487 | 0.335546 | 1.331784 | 0.252117 |
| ATF5|51133|AP | 1.144958 | 1.906474 | 0.631722 | 5.753555 | 0.252226 |
| HIST2H4A|7404|AD | -1.14475 | 0.252075 | 0.023816 | 2.668034 | 0.252313 |
| CCDC88A|53613|RI | 1.14469 | 5.190339 | 0.309472 | 87.05019 | 0.252337 |
| UBN1|93858|ES | 1.143308 | 3.975779 | 0.373111 | 42.36498 | 0.252911 |
| SNRNP35|25074|AP | 1.142987 | 2.19291 | 0.570489 | 8.429348 | 0.253044 |
| TMEM151B|97223|AT | -1.14295 | 0.725955 | 0.419174 | 1.25726 | 0.253058 |
| RAP1GAP|982|AP | 1.14247 | 1.909769 | 0.629425 | 5.794523 | 0.253259 |
| CCNL1|67389|ES | -1.14175 | 0.462753 | 0.123277 | 1.737075 | 0.253556 |
| IL12RB1|48392|AT | -1.14043 | 0.535228 | 0.18281 | 1.56703 | 0.254108 |
| GLIPR2|86325|ES | 1.138754 | 33.46017 | 0.079541 | 14075.59 | 0.254806 |
| MAP4K4|54762|ES | -1.13796 | 0.536597 | 0.183658 | 1.567786 | 0.255136 |
| BCAR1|37598|AP | 1.137724 | 1.909366 | 0.626614 | 5.818063 | 0.255236 |
| SOD2|78303|AT | -1.13712 | 0.313428 | 0.042429 | 2.315301 | 0.255489 |
| AMN1|21014|ES | 1.136525 | 2.426451 | 0.526113 | 11.19087 | 0.255737 |
| SNRNP35|25076|AP | -1.13587 | 0.474584 | 0.131155 | 1.717274 | 0.25601 |
| WASF3|93403|ME | -1.13395 | 0.714581 | 0.39975 | 1.277366 | 0.256817 |
| TIPARP|67367|AP | 1.133815 | 1.458533 | 0.759562 | 2.80072 | 0.256872 |
| ACOT9|88694|ES | -1.13361 | 0.669353 | 0.334365 | 1.339951 | 0.256957 |
| FAR1|14455|AP | -1.1317 | 0.639291 | 0.294573 | 1.387409 | 0.25776 |
| RNF38|86347|AP | 1.131574 | 1.740571 | 0.666496 | 4.545546 | 0.257813 |
| PFDN5|22005|ES | -1.1315 | 0.520053 | 0.167567 | 1.614006 | 0.257845 |
| ARFIP1|70858|ES | 1.131054 | 1.594409 | 0.710431 | 3.578306 | 0.258032 |
| NET1|10660|AP | 1.130887 | 1.785747 | 0.653711 | 4.87814 | 0.258103 |
| PIK3R1|72294|AP | 1.129619 | 1.367151 | 0.794632 | 2.352161 | 0.258637 |
| CRADD|23712|AP | -1.1293 | 0.098721 | 0.001775 | 5.491288 | 0.258773 |
| ANKRD10|26271|AT | 1.128975 | 1.537477 | 0.728616 | 3.244284 | 0.258908 |
| ANKRD10|26270|AT | -1.12895 | 0.650422 | 0.308237 | 1.37248 | 0.258919 |
| NOP2|19891|RI | -1.12868 | 0.558358 | 0.202967 | 1.536032 | 0.259032 |
| EVA1A|54151|ES | -1.12862 | 0.637714 | 0.291971 | 1.392875 | 0.259057 |
| SLAMF8|8418|ES | -1.12792 | 0.194939 | 0.011376 | 3.340622 | 0.259354 |
| MARK2|16540|ES | 1.127794 | 1.408872 | 0.776518 | 2.556182 | 0.259407 |
| SOS1|53315|ES | 1.125609 | 1.776066 | 0.653264 | 4.828691 | 0.260331 |
| IL12RB1|48393|AT | 1.125039 | 1.852749 | 0.632769 | 5.424848 | 0.260572 |
| ARHGEF9|89302|AP | -1.12368 | 0.557984 | 0.201684 | 1.54373 | 0.261147 |
| SEPT6|89969|ES | -1.12356 | 0.557613 | 0.201293 | 1.544674 | 0.261201 |
| FGFR1|83430|ES | -1.12337 | 0.631055 | 0.282644 | 1.408949 | 0.261282 |
| CECR1|60971|AP | -1.12333 | 0.695253 | 0.368737 | 1.310896 | 0.261296 |
| N4BP2L1|25590|ME | 1.122185 | 1.976924 | 0.601209 | 6.500614 | 0.261784 |
| IGFLR1|49257|AP | 1.121472 | 1.506743 | 0.736013 | 3.084558 | 0.262087 |
| CCL28|71947|AT | 1.121436 | 1.715282 | 0.668007 | 4.404433 | 0.262102 |
| CCL28|71946|AT | -1.12141 | 0.583003 | 0.227047 | 1.497013 | 0.262115 |
| VRK3|51144|AT | 1.12131 | 2.726555 | 0.472274 | 15.74108 | 0.262156 |
| CUL1|82147|AP | 1.121177 | 1.668519 | 0.681816 | 4.08315 | 0.262213 |
| UGP2|53744|AP | -1.12057 | 0.378993 | 0.069442 | 2.068421 | 0.262472 |
| PLCB2|29965|ES | -1.11918 | 0.512777 | 0.159198 | 1.651652 | 0.263065 |
| RUFY3|69444|AP | 1.118347 | 1.828188 | 0.63506 | 5.262919 | 0.263419 |
| ISCA1|86753|AP | -1.11565 | 0.119937 | 0.00289 | 4.977817 | 0.264572 |
| ADNP|59788|AP | 1.114586 | 1.951974 | 0.602122 | 6.32795 | 0.265028 |
| TARBP2|22068|AP | -1.11286 | 0.60372 | 0.248225 | 1.468337 | 0.265767 |
| GPR132|29599|ES | -1.11277 | 0.690735 | 0.359986 | 1.325371 | 0.265805 |
| MARK2|16544|ES | 1.109913 | 2.112965 | 0.563864 | 7.917908 | 0.267037 |
| SPHK2|50784|AT | 1.108704 | 2.173544 | 0.550964 | 8.574599 | 0.267558 |
| MEIS3|50642|AT | 1.108568 | 2.297781 | 0.527849 | 10.00247 | 0.267616 |
| KIAA2026|85813|ES | 1.107347 | 1.920529 | 0.605029 | 6.096292 | 0.268144 |
| KIAA1217|11009|ES | 1.10704 | 1.465364 | 0.744983 | 2.882336 | 0.268277 |
| ETFB|51319|AP | 1.107009 | 2.116691 | 0.561151 | 7.984269 | 0.26829 |
| ZNF124|10515|AT | 1.104918 | 1.634824 | 0.683604 | 3.909645 | 0.269195 |
| FBLIM1|772|AT | 1.103857 | 2.324092 | 0.519934 | 10.38863 | 0.269655 |
| FBLIM1|773|AT | -1.10384 | 0.430281 | 0.09626 | 1.923345 | 0.269663 |
| PHACTR2|77983|AP | -1.10351 | 0.516164 | 0.159465 | 1.670741 | 0.269804 |
| OSBPL9|2969|ES | 1.102464 | 1.567925 | 0.704816 | 3.487987 | 0.27026 |
| IL7R|71774|AT | -1.10175 | 0.327749 | 0.045051 | 2.384379 | 0.270572 |
| TGIF1|44511|AD | 1.099357 | 11.17744 | 0.151122 | 826.7158 | 0.271612 |
| ULK4|64260|AT | 1.098732 | 1.593513 | 0.694041 | 3.658695 | 0.271885 |
| YWHAZ|84721|AP | 1.098548 | 2.093187 | 0.560327 | 7.819424 | 0.271965 |
| UBE2I|33053|AP | -1.09777 | 0.098436 | 0.001569 | 6.177121 | 0.272306 |
| KTN1|27639|ES | 1.097059 | 2.109587 | 0.555902 | 8.005646 | 0.272616 |
| DRAM1|24011|ES | -1.097 | 0.054537 | 0.000302 | 9.858159 | 0.272642 |
| ARHGEF1|50099|AP | -1.09681 | 0.626247 | 0.271354 | 1.445286 | 0.272723 |
| ZKSCAN7|64365|AT | 1.096078 | 1.591993 | 0.693167 | 3.65632 | 0.273045 |
| ZKSCAN7|64364|AT | -1.09603 | 0.628155 | 0.273503 | 1.442681 | 0.273064 |
| EXOC1|69335|ES | -1.09591 | 0.579733 | 0.218665 | 1.537013 | 0.273116 |
| EXOSC10|644|RI | -1.09577 | 0.470149 | 0.121893 | 1.8134 | 0.273177 |
| BCL2L12|95310|ES | -1.09412 | 0.15573 | 0.005567 | 4.35632 | 0.2739 |
| CNOT2|23370|AT | 1.093898 | 11.71773 | 0.142485 | 963.6441 | 0.274 |
| NOTCH3|95040|ES | -1.09354 | 0.444912 | 0.104201 | 1.899665 | 0.274157 |
| CBWD3|86513|ES | 1.093359 | 1.551624 | 0.705962 | 3.410296 | 0.274236 |
| MAD2L2|665|ES | 1.090543 | 1.392739 | 0.767895 | 2.526023 | 0.275474 |
| NDUFB11|88904|AD | -1.09018 | 0.127412 | 0.003137 | 5.174784 | 0.275633 |
| ATG4D|47540|ES | -1.08899 | 0.395454 | 0.074465 | 2.100115 | 0.276159 |
| GK5|67108|ES | 1.087307 | 1.404782 | 0.761257 | 2.592307 | 0.276901 |
| RPSA|64183|ES | -1.08723 | 0.695787 | 0.361832 | 1.337967 | 0.276933 |
| CRYZ|3470|ES | 1.086702 | 9.714729 | 0.160883 | 586.6109 | 0.277169 |
| FAM19A2|22821|AP | -1.08655 | 0.742437 | 0.43386 | 1.270486 | 0.277237 |
| KLC1|29485|ES | 1.086071 | 1.709366 | 0.64961 | 4.497984 | 0.277447 |
| ARHGAP33|49299|ES | -1.08582 | 0.302567 | 0.034969 | 2.617968 | 0.277558 |
| RASSF7|13690|RI | -1.08529 | 0.403032 | 0.078093 | 2.080021 | 0.277791 |
| DOCK10|57781|AT | -1.08413 | 0.17412 | 0.007386 | 4.104835 | 0.278308 |
| IMPDH1|81671|AP | -1.08334 | 0.529078 | 0.16723 | 1.673886 | 0.278659 |
| PTPRJ|15813|AT | -1.08303 | 0.679756 | 0.338034 | 1.366927 | 0.278796 |
| PTPRJ|15812|AT | 1.083021 | 1.471113 | 0.731567 | 2.958273 | 0.278799 |
| CCDC82|18408|AP | 1.081267 | 1.476581 | 0.728538 | 2.992696 | 0.279578 |
| UBE2C|95967|ES | -1.08052 | 0.576211 | 0.211982 | 1.566261 | 0.27991 |
| MLLT1|47022|ES | -1.08039 | 0.16952 | 0.006775 | 4.24148 | 0.27997 |
| CEP41|81798|ES | 1.079603 | 2.88899 | 0.421003 | 19.8247 | 0.280319 |
| TEAD2|95290|ES | 1.078408 | 2.480388 | 0.475878 | 12.92836 | 0.280852 |
| FBXL12|47432|RI | -1.0784 | 0.568846 | 0.204035 | 1.585935 | 0.280856 |
| GDPD5|17855|AP | 1.077654 | 1.748274 | 0.632948 | 4.828932 | 0.281188 |
| IL1RN|55028|AP | 1.077589 | 1.31927 | 0.797014 | 2.183744 | 0.281217 |
| ZNF232|38656|RI | -1.07746 | 0.630049 | 0.271909 | 1.459903 | 0.281274 |
| ABCA2|88252|RI | -1.07719 | 0.659692 | 0.309478 | 1.406217 | 0.281395 |
| ITGB3|42067|AT | 1.076964 | 1.433359 | 0.744397 | 2.759975 | 0.281497 |
| SLC3A2|16464|AP | 1.075455 | 2.70935 | 0.440544 | 16.66251 | 0.282171 |
| CD44|15071|ES | 1.074389 | 1.602467 | 0.677955 | 3.787716 | 0.282648 |
| STEAP4|80362|AT | -1.07403 | 0.740741 | 0.428376 | 1.280878 | 0.282808 |
| STEAP4|80361|AT | 1.074017 | 1.349995 | 0.780711 | 2.334392 | 0.282815 |
| CNBP|66705|AA | 1.073657 | 39.76093 | 0.047824 | 33057.47 | 0.282977 |
| S100A16|7726|AD | 1.072212 | 4.398956 | 0.293312 | 65.97349 | 0.283625 |
| TIMP2|43921|AP | -1.07214 | 0.028211 | 4.15E-05 | 19.19469 | 0.283656 |
| CDK10|38115|RI | 1.070734 | 1.656435 | 0.657626 | 4.17225 | 0.284289 |
| NDUFS7|46465|RI | -1.07009 | 0.593701 | 0.228473 | 1.542766 | 0.28458 |
| CPSF7|16198|AD | -1.0699 | 0.32794 | 0.042538 | 2.528229 | 0.284664 |
| C11orf30|17890|AT | 1.069807 | 1.953875 | 0.572734 | 6.665617 | 0.284706 |
| C11orf30|17891|AT | -1.0698 | 0.511806 | 0.150024 | 1.746017 | 0.284709 |
| UQCRQ|73320|ES | 1.069475 | 2.218289 | 0.515099 | 9.553119 | 0.284856 |
| PEX1|80439|ES | 1.068963 | 1.976929 | 0.566612 | 6.897574 | 0.285086 |
| ACAP1|38921|AP | -1.06876 | 0.738683 | 0.423865 | 1.287326 | 0.285178 |
| DAB2|71863|ES | -1.06864 | 0.02405 | 2.58E-05 | 22.40166 | 0.285233 |
| SHROOM1|73315|ES | -1.06843 | 0.550516 | 0.184174 | 1.645552 | 0.285328 |
| AUTS2|79909|AT | 1.06697 | 3.208106 | 0.376962 | 27.30232 | 0.285986 |
| CENPT|37140|ES | -1.06598 | 0.61693 | 0.253836 | 1.499403 | 0.286432 |
| TEAD2|95292|ES | 1.065735 | 7.89628 | 0.176603 | 353.0596 | 0.286544 |
| HDHD2|45440|AD | -1.06534 | 0.45029 | 0.103753 | 1.954265 | 0.286724 |
| RPGR|88804|RI | -1.06488 | 0.674991 | 0.327425 | 1.391501 | 0.28693 |
| REPS1|77956|ES | -1.06431 | 0.596201 | 0.230023 | 1.545308 | 0.287189 |
| HDGFRP2|46805|AA | 1.063851 | 5.297152 | 0.245537 | 114.2793 | 0.287396 |
| FGD3|86892|AP | -1.06366 | 0.751697 | 0.444254 | 1.271903 | 0.287483 |
| ABCD4|28378|ES | -1.0636 | 0.498166 | 0.137945 | 1.799043 | 0.287509 |
| XPNPEP1|13072|ES | -1.06284 | 0.010017 | 2.06E-06 | 48.7021 | 0.287856 |
| IMPDH1|81670|AP | 1.061972 | 1.867458 | 0.589703 | 5.913827 | 0.288248 |
| NAIP|72431|AT | 1.060766 | 1.959832 | 0.565314 | 6.79435 | 0.288796 |
| NAIP|72432|AT | -1.06072 | 0.510259 | 0.147183 | 1.768982 | 0.288815 |
| PRUNE|7543|ES | 1.060404 | 11.66908 | 0.124398 | 1094.609 | 0.288961 |
| DECR1|84407|ES | -1.06029 | 0.684175 | 0.339213 | 1.379946 | 0.289011 |
| EPHX1|9997|AP | 1.059939 | 2283.711 | 0.001406 | 3.71E+09 | 0.289172 |
| FBXO4|71888|ES | -1.0588 | 0.42905 | 0.089585 | 2.054855 | 0.289692 |
| ST3GAL3|2194|AP | -1.05862 | 0.180767 | 0.007616 | 4.290489 | 0.289771 |
| MEIS1|53815|ES | -1.05672 | 0.612105 | 0.246286 | 1.521294 | 0.29064 |
| NR4A2|55613|AP | -1.05535 | 0.715855 | 0.384777 | 1.331803 | 0.291266 |
| ARHGEF7|26282|AT | 1.054369 | 346.7119 | 0.006583 | 18260397 | 0.291714 |
| FAM49B|85161|ES | -1.05406 | 0.546875 | 0.178035 | 1.67985 | 0.291856 |
| ENAH|9992|AA | -1.05233 | 0.403868 | 0.074621 | 2.185845 | 0.292649 |
| TMEM256-PLSCR3|38937|ES | 1.052289 | 1.938678 | 0.564944 | 6.652824 | 0.292667 |
| CD37|50915|AD | 1.052119 | 5.181126 | 0.241848 | 110.9956 | 0.292745 |
| MUTYH|2652|ES | 1.051658 | 5.405882 | 0.232825 | 125.5171 | 0.292957 |
| WTAP|78310|AP | -1.05099 | 0.592649 | 0.223406 | 1.572173 | 0.293261 |
| WTAP|78311|AP | 1.05095 | 1.687299 | 0.63605 | 4.476024 | 0.293281 |
| FYN|77273|ME | 1.050163 | 1.796935 | 0.601849 | 5.365089 | 0.293643 |
| SYBU|84908|AP | -1.0497 | 0.724705 | 0.397244 | 1.322102 | 0.293858 |
| INSIG2|55092|ES | -1.04883 | 0.109885 | 0.001773 | 6.809967 | 0.294255 |
| POGK|8823|RI | -1.04848 | 0.428201 | 0.087715 | 2.090362 | 0.294417 |
| SMCO4|18299|AP | 1.04834 | 1.895889 | 0.573347 | 6.269147 | 0.294482 |
| INPP5B|1849|AT | 1.047555 | 903.0434 | 0.002664 | 3.06E+08 | 0.294844 |
| ACAA1|64022|ES | 1.047095 | 3.246756 | 0.358189 | 29.42978 | 0.295056 |
| S100A13|156538|ES | 1.046821 | 1.370916 | 0.759426 | 2.474779 | 0.295182 |
| TAOK2|36000|RI | -1.04615 | 0.056074 | 0.000254 | 12.38678 | 0.295492 |
| TARBP2|22067|AP | 1.045558 | 1.608246 | 0.659981 | 3.918983 | 0.295765 |
| SCLT1|70589|AT | 1.044866 | 1.664713 | 0.639956 | 4.330404 | 0.296085 |
| FOXN3|28792|ES | -1.04347 | 0.621014 | 0.253793 | 1.519579 | 0.296732 |
| PLD3|49892|ES | -1.04322 | 0.652772 | 0.292916 | 1.45472 | 0.296844 |
| U2AF1L4|49277|AA | -1.0431 | 0.605875 | 0.236311 | 1.553396 | 0.296904 |
| RBBP6|35644|ES | 1.042049 | 1.74877 | 0.611199 | 5.0036 | 0.297389 |
| NCAPD2|19871|ES | 1.041522 | 6446.848 | 0.000437 | 9.5E+10 | 0.297633 |
| ACOX3|68767|ES | -1.04083 | 0.642466 | 0.279265 | 1.47803 | 0.297954 |
| C16orf62|34320|AP | 1.04052 | 2.130452 | 0.512566 | 8.855107 | 0.298098 |
| BCAT1|20753|AP | 1.040407 | 1.571387 | 0.670682 | 3.681713 | 0.298151 |
| PSME3|41144|AP | 1.039555 | 3.051862 | 0.372368 | 25.01254 | 0.298547 |
| ZFYVE28|68557|AP | 1.039533 | 1.337334 | 0.773078 | 2.31343 | 0.298557 |
| AP1S2|88572|AA | 1.039453 | 1.443633 | 0.722419 | 2.884858 | 0.298594 |
| NEDD9|75338|AP | 1.038896 | 3.140979 | 0.362502 | 27.21568 | 0.298853 |
| PBK|83192|AD | 1.038618 | 2.577419 | 0.43176 | 15.38608 | 0.298983 |
| ENOSF1|44466|ES | 1.037813 | 1.860501 | 0.575996 | 6.009528 | 0.299357 |
| WIBG|22293|ES | -1.03763 | 0.517196 | 0.148861 | 1.796925 | 0.299444 |
| HNMT|55466|AP | -1.03596 | 0.183613 | 0.007435 | 4.534677 | 0.300221 |
| KANSL1L|57260|AT | -1.03544 | 0.173426 | 0.006293 | 4.779466 | 0.300463 |
| ACHE|81027|AA | 1.034907 | 1.390823 | 0.744621 | 2.597816 | 0.300712 |
| RALGAPB|59380|AA | -1.03438 | 0.525593 | 0.155356 | 1.77816 | 0.30096 |
| MGAT1|75021|AP | -1.0339 | 0.540441 | 0.168313 | 1.735319 | 0.301185 |
| TRIM35|83147|ES | 1.032046 | 2.597452 | 0.423914 | 15.91537 | 0.302051 |
| MUC20|68182|AP | 1.030737 | 1.724167 | 0.611956 | 4.857792 | 0.302664 |
| NAALADL1|16742|ES | -1.0291 | 0.713263 | 0.374763 | 1.357509 | 0.303434 |
| POC1B|23632|ES | 1.028144 | 26.63728 | 0.051058 | 13896.93 | 0.303882 |
| IFI44|91013|ES | 1.027316 | 2.278248 | 0.473535 | 10.961 | 0.304272 |
| FNBP1|87886|ES | 1.027291 | 1.538072 | 0.676464 | 3.497107 | 0.304284 |
| RNASE1|26468|ES | 1.026983 | 1.915894 | 0.553956 | 6.62625 | 0.304428 |
| SLC12A8|66544|AP | 1.026872 | 1.462165 | 0.708064 | 3.019398 | 0.304481 |
| OMA1|117617|ES | 1.026754 | 3.656084 | 0.307807 | 43.42639 | 0.304536 |
| PATZ1|61847|ES | -1.02549 | 0.474018 | 0.113803 | 1.974393 | 0.305134 |
| BCL2L13|96061|ES | -1.02447 | 0.459614 | 0.103872 | 2.033699 | 0.305614 |
| NAA60|33526|RI | -1.02344 | 0.001961 | 1.28E-08 | 300.3664 | 0.306102 |
| ANKRD10|105827|ME | 1.023426 | 1.676517 | 0.623224 | 4.509951 | 0.306107 |
| SEC22A|66461|AP | 1.023399 | 2.340314 | 0.459259 | 11.92587 | 0.306119 |
| ZNF141|68345|AT | 1.02322 | 1.496148 | 0.691534 | 3.236948 | 0.306204 |
| ZNF141|68344|AT | -1.02321 | 0.668386 | 0.308934 | 1.446067 | 0.306208 |
| TMEM151B|97224|AT | 1.022672 | 1.332747 | 0.768541 | 2.31115 | 0.306463 |
| PI4K2A|12729|AP | 1.02203 | 1.687892 | 0.618532 | 4.606038 | 0.306767 |
| ZFYVE28|68556|AP | -1.02196 | 0.747241 | 0.427344 | 1.306603 | 0.306799 |
| CD37|50910|AP | 1.021458 | 2.435715 | 0.441338 | 13.44255 | 0.307038 |
| ZNF717|65633|AP | 1.021238 | 1.774252 | 0.590343 | 5.332442 | 0.307141 |
| ZNF717|65634|AP | -1.02114 | 0.563651 | 0.187543 | 1.694023 | 0.307189 |
| CAPRIN1|14944|AT | 1.020488 | 16.39442 | 0.076161 | 3529.062 | 0.307497 |
| PEX16|15516|AP | 1.020403 | 4.500683 | 0.25031 | 80.9243 | 0.307537 |
| MARK3|29447|ES | 1.020135 | 1.398536 | 0.734165 | 2.664119 | 0.307664 |
| IGFLR1|49260|ES | 1.019678 | 1.606664 | 0.645815 | 3.997073 | 0.307881 |
| DERL3|61336|AA | 1.019563 | 20.90774 | 0.060563 | 7217.857 | 0.307936 |
| NAALADL1|16740|ES | -1.01827 | 0.757798 | 0.444343 | 1.292375 | 0.308549 |
| HMCES|66715|ES | -1.01699 | 0.093111 | 0.00096 | 9.035604 | 0.309157 |
| C9orf116|88112|AP | 1.016579 | 1.419529 | 0.722454 | 2.789191 | 0.309354 |
| NEK11|66785|ES | -1.01643 | 0.478947 | 0.115823 | 1.980528 | 0.309423 |
| CC2D1B|3002|AT | -1.01628 | 0.197449 | 0.008644 | 4.510458 | 0.309498 |
| C6orf132|76170|AT | -1.01626 | 0.616147 | 0.242141 | 1.567835 | 0.309505 |
| C6orf132|76171|AT | 1.016225 | 1.622966 | 0.637811 | 4.129778 | 0.309522 |
| TCTN1|24461|AT | -1.01586 | 0.551188 | 0.174651 | 1.739511 | 0.309696 |
| TCTN1|24458|AT | 1.015749 | 1.814145 | 0.574837 | 5.725315 | 0.309749 |
| C9orf116|88110|AP | -1.0155 | 0.704633 | 0.358528 | 1.38485 | 0.309869 |
| CCAR1|11956|ES | -1.01469 | 0.418356 | 0.077719 | 2.25198 | 0.310254 |
| SEC23A|27346|AP | 1.014276 | 1.677581 | 0.61732 | 4.558862 | 0.310451 |
| GPBP1|72127|ES | -1.01267 | 0.594079 | 0.216836 | 1.627634 | 0.311219 |
| STK36|57558|AA | -1.0126 | 0.525656 | 0.151391 | 1.825172 | 0.31125 |
| MACF1|1883|ES | 1.012527 | 1.798279 | 0.577466 | 5.599993 | 0.311286 |
| UBXN11|101234|ES | -1.01196 | 0.497429 | 0.128636 | 1.923538 | 0.311556 |
| RAB15|27924|AD | 1.01182 | 1.573813 | 0.653795 | 3.788477 | 0.311624 |
| MYO19|40490|ES | -1.0115 | 0.252023 | 0.017443 | 3.641323 | 0.311777 |
| ZNF205|33452|AA | 1.010757 | 1.661508 | 0.620762 | 4.447129 | 0.312133 |
| CD46|9663|ES | -1.01071 | 0.70196 | 0.353415 | 1.394251 | 0.312153 |
| KLK7|51262|ES | -1.01033 | 0.262791 | 0.019665 | 3.51177 | 0.312339 |
| ZNF567|49418|AT | 1.009779 | 2.431884 | 0.433345 | 13.64745 | 0.312601 |
| FAM168A|107209|ES | -1.00765 | 0.672397 | 0.310703 | 1.455147 | 0.313621 |
| GALNT11|82404|AT | 1.007042 | 13.75131 | 0.083721 | 2258.681 | 0.313914 |
| RASEF|86676|AT | -1.00645 | 0.622777 | 0.247637 | 1.566209 | 0.314199 |
| MYO10|71603|AT | 1.006425 | 30.25248 | 0.039541 | 23145.73 | 0.314211 |
| CHFR|25308|AP | -1.00531 | 0.609172 | 0.231775 | 1.601086 | 0.314749 |
| C1QA|1011|AP | -1.00477 | 0.043977 | 9.92E-05 | 19.49144 | 0.315009 |
| MPV17|52974|ES | -1.00471 | 0.664158 | 0.298924 | 1.475643 | 0.315038 |
| RIN1|17014|AP | 1.004632 | 2.723101 | 0.385732 | 19.22392 | 0.315074 |
| SLC35C1|15509|RI | -1.00388 | 0.546414 | 0.167906 | 1.778192 | 0.315434 |
| MLXIP|107806|ES | 1.003597 | 3.004208 | 0.350552 | 25.74587 | 0.315573 |
| AMPD3|14349|AP | -1.00239 | 0.703143 | 0.353159 | 1.399966 | 0.316155 |
| MUC1|8016|AA | 1.000977 | 2.074454 | 0.497038 | 8.657997 | 0.316838 |
| KANK2|47638|ES | -1.0007 | 0.505263 | 0.132687 | 1.924004 | 0.316972 |
| FAM168A|17696|ES | -1.00057 | 0.640453 | 0.267563 | 1.533022 | 0.317034 |
| NCAM1|18767|AT | -1.00028 | 0.260508 | 0.018671 | 3.634711 | 0.317175 |
| TUBE1|77291|AA | -0.99973 | 0.619634 | 0.242448 | 1.583623 | 0.31744 |
| FAR1|14454|AP | 0.997885 | 1.483785 | 0.683562 | 3.220804 | 0.318335 |
| PLXNC1|23719|AP | 0.997216 | 1.331601 | 0.758446 | 2.337886 | 0.31866 |
| FAM92A1|84516|AP | 0.996819 | 1.793415 | 0.568707 | 5.655523 | 0.318853 |
| TRIP12|57856|ES | 0.996708 | 1.77183 | 0.575328 | 5.456674 | 0.318906 |
| KREMEN2|33320|AA | 0.995625 | 1.40647 | 0.718661 | 2.752561 | 0.319433 |
| VWA9|31206|ES | 0.994875 | 1.714355 | 0.5928 | 4.957845 | 0.319797 |
| DMPK|50523|ES | 0.994855 | 1.714797 | 0.592639 | 4.961748 | 0.319807 |
| COL1A1|265345|ES | -0.99284 | 0.499817 | 0.127126 | 1.965123 | 0.32079 |
| PHLDB2|66064|ES | -0.992 | 0.453545 | 0.0951 | 2.163021 | 0.321198 |
| VPS33A|24940|AT | 0.991185 | 12.37592 | 0.085531 | 1790.743 | 0.321595 |
| CD14|73687|RI | 0.990609 | 2.408352 | 0.423126 | 13.70787 | 0.321877 |
| CLN3|35745|ES | -0.98928 | 0.086944 | 0.000688 | 10.98546 | 0.322525 |
| ODF3B|62859|AA | -0.98861 | 0.308501 | 0.02997 | 3.175657 | 0.322856 |
| SNX5|95859|ES | -0.98787 | 0.264107 | 0.018818 | 3.70665 | 0.323215 |
| POP5|24773|ES | -0.98658 | 0.256021 | 0.01709 | 3.835393 | 0.323849 |
| TRAF2|88233|AP | 0.985744 | 2.662005 | 0.379981 | 18.64899 | 0.324259 |
| PAPOLA|29206|ES | 0.984486 | 2.642495 | 0.38181 | 18.28862 | 0.324877 |
| PTCD1|80625|AP | 0.984334 | 1.635047 | 0.614268 | 4.352137 | 0.324952 |
| MCF2L|26317|AP | 0.983439 | 1.323546 | 0.757037 | 2.313987 | 0.325391 |
| C2ORF15|54673|AT | -0.98136 | 0.365703 | 0.049047 | 2.726762 | 0.326417 |
| CYGB|43589|AP | -0.98073 | 0.705815 | 0.351806 | 1.416049 | 0.326726 |
| MBNL1|67324|ES | -0.9803 | 0.597413 | 0.213288 | 1.673331 | 0.32694 |
| AKNA|87314|AP | -0.98008 | 0.695588 | 0.336579 | 1.43753 | 0.327048 |
| DERL3|61334|RI | 0.980041 | 1.549601 | 0.645361 | 3.720802 | 0.327066 |
| IFIT3|12489|AP | -0.98003 | 0.611204 | 0.228338 | 1.636037 | 0.327071 |
| B4GALT2|2517|AD | -0.97978 | 0.620198 | 0.238508 | 1.612712 | 0.327197 |
| SRSF11|3386|ES | 0.979341 | 1.489519 | 0.671008 | 3.306472 | 0.327411 |
| COL1A1|201043|ES | -0.97922 | 0.481401 | 0.111436 | 2.079636 | 0.327471 |
| SLC22A18|13935|AP | 0.979198 | 1.578997 | 0.632851 | 3.939683 | 0.327482 |
| NEDD1|23832|AP | 0.978611 | 1.955006 | 0.510547 | 7.486182 | 0.327772 |
| DIDO1|60091|AT | -0.97649 | 0.629389 | 0.248496 | 1.594117 | 0.328823 |
| MEAF6|1800|ES | -0.97646 | 0.749298 | 0.419816 | 1.337367 | 0.328838 |
| DPYSL3|73957|AP | -0.97606 | 0.687303 | 0.323695 | 1.459353 | 0.329034 |
| DPYSL3|73958|AP | 0.976036 | 1.454949 | 0.685229 | 3.089299 | 0.329047 |
| XRN2|58835|ES | 0.974925 | 5.620788 | 0.174753 | 180.788 | 0.329597 |
| THRA|40839|AT | -0.9747 | 0.522341 | 0.141515 | 1.92799 | 0.329711 |
| THRA|40840|AT | 0.974678 | 1.914435 | 0.518668 | 7.066293 | 0.32972 |
| PIGG|68358|AD | 0.974424 | 1.718081 | 0.578462 | 5.102841 | 0.329846 |
| TSHZ2|59817|AP | -0.97409 | 0.082378 | 0.000542 | 12.51132 | 0.330012 |
| CERS4|47208|ES | 0.973923 | 13.5691 | 0.071344 | 2580.745 | 0.330095 |
| STRADA|42977|ES | -0.97278 | 0.687496 | 0.323148 | 1.462643 | 0.330661 |
| FAM96A|31084|ES | 0.971538 | 2.739532 | 0.358687 | 20.92363 | 0.33128 |
| KLK8|95350|ES | -0.97143 | 0.71374 | 0.361444 | 1.409419 | 0.331337 |
| ANKRD54|62166|ES | -0.97049 | 0.597911 | 0.211612 | 1.689399 | 0.331802 |
| FOXJ3|2064|AP | 0.969628 | 1.481511 | 0.669344 | 3.279143 | 0.332232 |
| SCAND1|59258|RI | -0.9696 | 0.556748 | 0.170424 | 1.818809 | 0.332245 |
| SLFN12|40297|AP | -0.96802 | 0.665817 | 0.292212 | 1.51709 | 0.333035 |
| ZNF473|51161|AA | -0.96788 | 0.661178 | 0.286063 | 1.528179 | 0.333103 |
| HYAL2|65008|ES | 0.967488 | 1.311808 | 0.756982 | 2.273288 | 0.3333 |
| QKI|78406|RI | 0.966452 | 1.314751 | 0.754795 | 2.29012 | 0.333818 |
| BCAP29|81353|AP | -0.96606 | 0.161917 | 0.004028 | 6.508821 | 0.334015 |
| WWP2|37317|AT | 0.966013 | 1.883163 | 0.52139 | 6.801634 | 0.334037 |
| WWP2|37316|AT | -0.96596 | 0.531039 | 0.147028 | 1.918012 | 0.334062 |
| TJP1|29765|AD | -0.96595 | 0.550849 | 0.164275 | 1.847114 | 0.334071 |
| DROSHA|96873|ES | 0.965143 | 1.863676 | 0.5264 | 6.598194 | 0.334473 |
| CAV1|81528|AP | 0.96347 | 1.660071 | 0.592009 | 4.655052 | 0.335312 |
| PAM|72894|ES | 0.962947 | 1.633826 | 0.601521 | 4.437731 | 0.335574 |
| HDAC6|98334|AD | -0.96148 | 0.588684 | 0.199891 | 1.733693 | 0.336309 |
| CAV1|81529|AP | -0.96101 | 0.603205 | 0.215143 | 1.691232 | 0.336547 |
| SLC6A6|63528|ES | 0.960842 | 1.714065 | 0.571017 | 5.145235 | 0.336631 |
| MORN1|254|AT | -0.96035 | 0.625791 | 0.240416 | 1.628899 | 0.336879 |
| C1S|20067|AP | -0.95993 | 0.574937 | 0.185704 | 1.78 | 0.337088 |
| ZNF584|52455|ES | 0.959631 | 1.397658 | 0.705394 | 2.7693 | 0.337241 |
| OXR1|84855|ES | -0.95853 | 0.709206 | 0.351267 | 1.431882 | 0.337796 |
| PRELID2|73894|AT | -0.95836 | 0.186692 | 0.006032 | 5.777881 | 0.337883 |
| ITGB1BP1|100220|ES | -0.95625 | 0.606917 | 0.218083 | 1.689026 | 0.338947 |
| TCF7L2|13141|ES | 0.956239 | 1.711601 | 0.568862 | 5.149891 | 0.338951 |
| TRIOBP|62150|AP | 0.95611 | 8.587739 | 0.104589 | 705.1323 | 0.339017 |
| SMIM19|83734|AP | 0.956092 | 3.147799 | 0.299989 | 33.03 | 0.339026 |
| CCDC25|83180|ES | -0.95468 | 0.359644 | 0.044063 | 2.935424 | 0.33974 |
| RCAN1|60488|AP | -0.95415 | 0.727374 | 0.378258 | 1.398708 | 0.340007 |
| SERPING1|15866|AP | -0.95412 | 0.469501 | 0.099337 | 2.219025 | 0.340021 |
| IDH3B|58549|AA | -0.95376 | 0.014221 | 2.28E-06 | 88.84806 | 0.340207 |
| KIF23|31397|ES | 0.953578 | 1.583787 | 0.615523 | 4.075204 | 0.340297 |
| FUOM|13552|AP | 0.953071 | 2.866005 | 0.328775 | 24.98356 | 0.340554 |
| DBNDD2|59542|AD | 0.952167 | 3.978362 | 0.231878 | 68.25744 | 0.341012 |
| C14orf159|28836|AP | 0.951967 | 1.717058 | 0.564152 | 5.226053 | 0.341114 |
| PILRA|80938|AA | -0.95175 | 0.00684 | 2.38E-07 | 196.517 | 0.341222 |
| STAU1|59741|ES | -0.95141 | 0.616172 | 0.227233 | 1.670827 | 0.341399 |
| SH3D19|70836|ES | 0.950781 | 1.663896 | 0.582494 | 4.75293 | 0.341715 |
| PKIG|59473|AP | 0.949782 | 7.974465 | 0.109889 | 578.6914 | 0.342223 |
| EMC8|37897|ES | -0.94888 | 0.195437 | 0.006707 | 5.69463 | 0.342679 |
| EPB41|1411|ES | 0.947961 | 1.340617 | 0.731299 | 2.457616 | 0.343149 |
| HPS5|14593|ES | -0.94708 | 0.580413 | 0.188277 | 1.789274 | 0.343597 |
| SMPD4|55297|ES | 0.944457 | 12.92698 | 0.06381 | 2618.822 | 0.344936 |
| ST3GAL6|65789|AP | -0.94273 | 0.633866 | 0.245666 | 1.6355 | 0.345819 |
| DMKN|49190|ES | 0.942562 | 1.77815 | 0.537259 | 5.885085 | 0.345905 |
| SPINT2|49599|ES | -0.94241 | 0.01233 | 1.32E-06 | 115.146 | 0.345981 |
| SCYL1|16860|AA | -0.94074 | 0.436687 | 0.077713 | 2.453849 | 0.346837 |
| ANAPC11|44208|ES | 0.940682 | 2.138159 | 0.438918 | 10.4159 | 0.346868 |
| KLF7|57163|AP | 0.940129 | 1.596227 | 0.602125 | 4.231586 | 0.347152 |
| NASP|2706|ES | 0.939976 | 1.391185 | 0.698892 | 2.769235 | 0.34723 |
| EXOC1|69336|AD | 0.938909 | 1.612086 | 0.594932 | 4.368265 | 0.347778 |
| ARFIP2|14140|ES | -0.93848 | 0.356597 | 0.041393 | 3.072066 | 0.347998 |
| SYNE1|78181|AT | 0.938169 | 6.031638 | 0.141254 | 257.5557 | 0.348157 |
| SARNP|22254|ES | -0.93769 | 0.00343 | 2.42E-08 | 486.4747 | 0.348402 |
| MALT1|45679|ES | -0.93738 | 0.55272 | 0.159997 | 1.909406 | 0.348562 |
| DFFA|616|AT | -0.9367 | 0.467072 | 0.094973 | 2.297027 | 0.34891 |
| DFFA|617|AT | 0.936705 | 2.140997 | 0.435345 | 10.52927 | 0.34891 |
| TAZ|90593|ES | -0.9365 | 0.635781 | 0.246409 | 1.640431 | 0.349016 |
| FKBP11|21496|AT | 0.935258 | 1.736744 | 0.54618 | 5.522502 | 0.349655 |
| MOK|29375|ES | -0.93427 | 0.59616 | 0.201421 | 1.764499 | 0.350167 |
| SNX14|76924|ES | 0.933807 | 1.450236 | 0.664654 | 3.164329 | 0.350403 |
| XPNPEP3|62400|AP | -0.93353 | 0.631686 | 0.240796 | 1.657121 | 0.350549 |
| XPNPEP3|62399|AP | 0.933473 | 1.583024 | 0.60344 | 4.152798 | 0.350576 |
| THAP3|486|AT | -0.93251 | 0.394009 | 0.055633 | 2.790473 | 0.351073 |
| THAP3|487|AT | 0.932316 | 2.537562 | 0.358287 | 17.97225 | 0.351173 |
| R3HDM1|55443|ES | 0.932284 | 1.38353 | 0.699173 | 2.737739 | 0.35119 |
| C2orf49|54816|RI | -0.93164 | 0.47646 | 0.100153 | 2.266671 | 0.351523 |
| PRKD2|50584|AD | 0.931369 | 2.934883 | 0.304507 | 28.28683 | 0.351663 |
| RPS7|52573|ES | -0.93126 | 0.647915 | 0.259915 | 1.615123 | 0.351721 |
| BCL6|68082|ES | 0.930722 | 17.37872 | 0.042533 | 7100.881 | 0.351997 |
| VWA5B1|923|AT | -0.9306 | 0.777356 | 0.457354 | 1.321259 | 0.35206 |
| PIGO|86232|AP | 0.930455 | 2.045328 | 0.453058 | 9.233619 | 0.352136 |
| ABHD11|80029|ES | 0.929888 | 1.504665 | 0.635978 | 3.559898 | 0.352429 |
| FOXP1|65601|AT | -0.92947 | 0.297079 | 0.022978 | 3.840852 | 0.352648 |
| MLXIPL|79990|ES | 0.929452 | 4.212343 | 0.203035 | 87.39288 | 0.352655 |
| DTX3|22662|ES | -0.92931 | 0.644963 | 0.255761 | 1.626433 | 0.352729 |
| SLC39A8|70107|AT | -0.92866 | 0.021878 | 6.86E-06 | 69.73418 | 0.353063 |
| COL1A1|265507|ES | 0.928321 | 2.620263 | 0.342842 | 20.0261 | 0.353241 |
| STAMBP|53985|AP | -0.92782 | 0.584154 | 0.187643 | 1.818542 | 0.3535 |
| PTCD1|80624|AP | -0.92743 | 0.62972 | 0.236964 | 1.673448 | 0.353701 |
| CTNND1|15979|ES | -0.92669 | 0.736284 | 0.385338 | 1.406851 | 0.354089 |
| SLC25A22|13758|AP | 0.92663 | 1.486263 | 0.642817 | 3.436405 | 0.354118 |
| AFMID|43832|ES | 0.926413 | 1.413868 | 0.679511 | 2.941853 | 0.354231 |
| IFIT3|12488|AP | 0.926005 | 1.591097 | 0.595374 | 4.252103 | 0.354443 |
| NIPBL|71817|AT | 0.925701 | 2.24544 | 0.405041 | 12.44811 | 0.354602 |
| KCNAB2|374|ES | 0.925688 | 1.486786 | 0.642016 | 3.443114 | 0.354608 |
| NIPBL|71818|AT | -0.92561 | 0.44538 | 0.080339 | 2.469072 | 0.354646 |
| NPHP1|54928|AT | 0.925514 | 1.449116 | 0.660594 | 3.178861 | 0.354699 |
| NPHP1|54927|AT | -0.92551 | 0.690076 | 0.314578 | 1.513789 | 0.354699 |
| KIAA1468|45699|ME | -0.9255 | 0.765084 | 0.433945 | 1.34891 | 0.354707 |
| ZNF396|45167|AT | 0.92477 | 2.087801 | 0.43867 | 9.936659 | 0.355086 |
| F11R|8517|AP | -0.92403 | 0.737205 | 0.386125 | 1.407498 | 0.355471 |
| SUMF1|62986|AT | -0.92384 | 0.006617 | 1.57E-07 | 278.1357 | 0.355572 |
| GSDMD|85421|AP | 0.923792 | 1.59496 | 0.59236 | 4.294518 | 0.355595 |
| F11R|8516|AP | 0.923422 | 1.356196 | 0.710343 | 2.589266 | 0.355787 |
| IL18BP|17473|AT | -0.92293 | 0.598207 | 0.200893 | 1.7813 | 0.356044 |
| DONSON|107017|ES | -0.9226 | 0.59283 | 0.19523 | 1.800171 | 0.356214 |
| OCIAD1|69232|ES | 0.922411 | 25.27675 | 0.026435 | 24169.07 | 0.356314 |
| DMKN|49168|ES | 0.922301 | 1.35546 | 0.710218 | 2.586911 | 0.356372 |
| EFHD1|58005|AP | -0.92097 | 0.241027 | 0.011668 | 4.97882 | 0.357067 |
| INTS4|17992|AT | 0.919262 | 2.835899 | 0.30726 | 26.17434 | 0.357959 |
| TMUB2|41789|ES | -0.91923 | 0.75347 | 0.412049 | 1.377788 | 0.357973 |
| SMAGP|21829|AP | -0.91888 | 0.638066 | 0.244707 | 1.663741 | 0.358158 |
| PPOX|8581|ES | 0.918844 | 13.78125 | 0.05118 | 3710.877 | 0.358177 |
| MRPL55|117461|ES | 0.918168 | 2.826935 | 0.30755 | 25.9846 | 0.358531 |
| TEAD2|95289|ES | 0.917878 | 1.46992 | 0.645755 | 3.345953 | 0.358683 |
| TMEM198|57722|AP | -0.917 | 0.729678 | 0.372041 | 1.431104 | 0.359145 |
| LYPD1|55393|AP | 0.916395 | 5.705136 | 0.137652 | 236.456 | 0.35946 |
| MIER1|3333|AP | -0.91617 | 0.678761 | 0.296284 | 1.554981 | 0.359577 |
| ADIRF|12443|ES | 0.916159 | 1.730775 | 0.535261 | 5.596485 | 0.359584 |
| PI4KB|7600|ES | -0.91556 | 0.661205 | 0.272724 | 1.603059 | 0.3599 |
| SQSTM1|74932|AP | 0.915112 | 4.930255 | 0.16177 | 150.2588 | 0.360133 |
| PI4KB|7599|ES | -0.9145 | 0.685014 | 0.304488 | 1.541097 | 0.360455 |
| MAP4K4|54754|ES | -0.91443 | 0.581156 | 0.181586 | 1.859959 | 0.360493 |
| IL17RC|63260|ES | 0.914344 | 2.294924 | 0.386754 | 13.61765 | 0.360536 |
| MLTK|55999|AT | -0.91416 | 0.596205 | 0.196717 | 1.806962 | 0.360633 |
| MLTK|55998|AT | 0.914159 | 1.677275 | 0.553415 | 5.083438 | 0.360633 |
| COQ6|28338|AP | 0.913564 | 2.535759 | 0.344456 | 18.66735 | 0.360946 |
| ZNF655|80694|ES | -0.91252 | 0.567643 | 0.168215 | 1.915512 | 0.361493 |
| IL1RN|55030|AP | -0.91219 | 0.788198 | 0.472652 | 1.314405 | 0.36167 |
| PTPRA|58565|AP | 0.912172 | 1.609289 | 0.578954 | 4.473256 | 0.361678 |
| PTPRA|58566|AP | -0.91216 | 0.621395 | 0.223551 | 1.727267 | 0.361684 |
| ERI2|34391|AP | 0.911936 | 1.38708 | 0.686582 | 2.802274 | 0.361802 |
| LPXN|16012|ES | 0.911631 | 2.246495 | 0.394262 | 12.80046 | 0.361963 |
| IKBKE|9584|ES | 0.910965 | 2.402401 | 0.364483 | 15.83486 | 0.362314 |
| RTEL1|60146|AD | 0.909815 | 1.866407 | 0.486622 | 7.158477 | 0.36292 |
| ABCC1|34210|ES | 0.908535 | 57.23491 | 0.009245 | 354344.5 | 0.363595 |
| RTN4|53592|ES | -0.90824 | 0.771294 | 0.440395 | 1.35082 | 0.363752 |
| ANKLE2|25298|AT | 0.907699 | 11.17557 | 0.060922 | 2050.042 | 0.364037 |
| GABPA|60277|AP | -0.90695 | 0.68181 | 0.297989 | 1.560005 | 0.364434 |
| EHF|14962|ES | 0.905957 | 3.381272 | 0.242359 | 47.17387 | 0.364959 |
| ZFAND5|86600|ES | -0.90575 | 0.522895 | 0.128556 | 2.126854 | 0.365066 |
| CBLB|65995|AP | 0.905305 | 1.6825 | 0.545466 | 5.189701 | 0.365304 |
| CALHM2|13012|AA | -0.90374 | 0.579749 | 0.177736 | 1.891064 | 0.366132 |
| DMKN|49186|ES | 0.902087 | 1.45277 | 0.645345 | 3.270411 | 0.367011 |
| TMEM198|57723|AP | 0.901953 | 1.363283 | 0.695228 | 2.673282 | 0.367082 |
| TMEM62|30214|ES | 0.901432 | 1.746826 | 0.519436 | 5.874456 | 0.367358 |
| COQ4|87736|AT | 0.90011 | 1.881564 | 0.475074 | 7.45206 | 0.368062 |
| METTL21A|57184|AP | 0.898324 | 1.511508 | 0.613723 | 3.722619 | 0.369013 |
| LRRC23|19998|AT | -0.89656 | 0.620617 | 0.218734 | 1.760888 | 0.369955 |
| LRRC23|20000|AT | 0.896509 | 1.61126 | 0.56788 | 4.571672 | 0.369981 |
| ARMC10|81164|ES | 0.896418 | 2.148255 | 0.403646 | 11.43329 | 0.37003 |
| SCN11A|64113|AT | -0.89639 | 0.543519 | 0.143303 | 2.061453 | 0.370047 |
| NCOA4|11536|AP | -0.8963 | 0.648394 | 0.251409 | 1.672236 | 0.370094 |
| SET|87775|AP | 0.896214 | 2.212758 | 0.389569 | 12.56849 | 0.370138 |
| WDR91|81881|ES | -0.89585 | 0.314854 | 0.025122 | 3.946017 | 0.370333 |
| ANKRD10|26273|ES | -0.89543 | 0.717686 | 0.347214 | 1.483445 | 0.370555 |
| AFMID|43795|ES | -0.89465 | 0.734648 | 0.373844 | 1.44367 | 0.370974 |
| RCAN1|60494|AP | 0.89434 | 1.330007 | 0.711911 | 2.48475 | 0.37114 |
| UBE2V1|59766|RI | 0.894111 | 1.901077 | 0.464954 | 7.773018 | 0.371263 |
| GAPDH|19872|AP | 0.892981 | 154.9587 | 0.002416 | 9940779 | 0.371867 |
| BBS5|55864|AT | 0.892907 | 15.16622 | 0.038798 | 5928.524 | 0.371907 |
| ERI2|34390|AP | -0.89111 | 0.725986 | 0.358959 | 1.468286 | 0.372868 |
| CD33|51313|AT | 0.89055 | 2.055984 | 0.420835 | 10.0445 | 0.37317 |
| IL1R1|54771|AP | -0.89004 | 0.648287 | 0.249607 | 1.683748 | 0.373445 |
| USP33|3532|ES | -0.88944 | 0.225119 | 0.008421 | 6.017759 | 0.373767 |
| TMEM234|1571|RI | -0.88925 | 0.492491 | 0.103377 | 2.346253 | 0.373871 |
| LTBP4|49928|AP | 0.88794 | 1.969547 | 0.441171 | 8.792772 | 0.374573 |
| ZNF197|64373|AP | 0.887304 | 2.606463 | 0.314077 | 21.63054 | 0.374915 |
| LRR1|27428|ES | -0.88723 | 0.603982 | 0.198284 | 1.839758 | 0.374956 |
| NPIPB3|34444|AP | -0.88601 | 0.671537 | 0.278309 | 1.620359 | 0.37561 |
| NFIC|46681|ES | 0.885977 | 1.787179 | 0.494675 | 6.456781 | 0.37563 |
| TRIM17|10210|AP | -0.88592 | 0.74512 | 0.388639 | 1.428587 | 0.375662 |
| FAM91A1|85069|AT | 0.885696 | 12.65078 | 0.04605 | 3475.368 | 0.375781 |
| MICALL2|78570|AP | 0.885248 | 1.988124 | 0.434192 | 9.103432 | 0.376023 |
| EPB41L1|59268|AP | -0.88515 | 0.741333 | 0.382108 | 1.43827 | 0.376078 |
| TRIM17|10211|AP | 0.884797 | 1.341541 | 0.699748 | 2.571972 | 0.376266 |
| NDUFS8|17280|ES | 0.884617 | 1.41617 | 0.655093 | 3.061456 | 0.376363 |
| MMS19|12721|ES | 0.884498 | 7.989233 | 0.079917 | 798.6751 | 0.376427 |
| TMUB2|41797|ES | -0.88449 | 0.709582 | 0.331768 | 1.517649 | 0.376434 |
| COPS7A|19947|ES | -0.88416 | 0.089634 | 0.000427 | 18.81792 | 0.376608 |
| NME9|66979|AT | -0.88386 | 0.814741 | 0.517254 | 1.28332 | 0.376774 |
| PYGO2|7853|AP | 0.883762 | 3.731523 | 0.20118 | 69.21286 | 0.376825 |
| GIGYF2|58023|ES | -0.88376 | 0.729569 | 0.362562 | 1.468084 | 0.376825 |
| H2AFY|96931|ME | -0.88375 | 0.520944 | 0.122657 | 2.212525 | 0.376832 |
| GCNT2|75295|AP | 0.883522 | 1.303951 | 0.723721 | 2.34937 | 0.376954 |
| SEC31A|69734|ES | 0.883232 | 1.547896 | 0.587069 | 4.081263 | 0.377111 |
| YPEL4|15880|RI | -0.88202 | 0.810611 | 0.508371 | 1.29254 | 0.377768 |
| CCM2|79581|AP | 0.88194 | 8.863119 | 0.06946 | 1130.939 | 0.377809 |
| ELP2|45228|ES | 0.881487 | 1.886114 | 0.460097 | 7.731903 | 0.378054 |
| NSG1|68672|RI | 0.879638 | 62.37426 | 0.006244 | 623079.5 | 0.379055 |
| HOPX|69376|AD | -0.87953 | 0.685029 | 0.294849 | 1.591547 | 0.379115 |
| C17orf75|40200|AA | -0.8795 | 0.304017 | 0.021406 | 4.317819 | 0.379133 |
| MYADM|51742|AP | 0.878602 | 2.328293 | 0.353394 | 15.33969 | 0.379617 |
| LACC1|25776|AP | -0.8786 | 0.711979 | 0.333699 | 1.519079 | 0.379618 |
| TPM1|30980|AP | 0.878124 | 1.367539 | 0.680023 | 2.750145 | 0.379876 |
| APH1A|7451|ES | -0.87794 | 0.683348 | 0.292069 | 1.598815 | 0.379978 |
| NRSN2|95829|ES | 0.877245 | 4.470196 | 0.157525 | 126.8539 | 0.380354 |
| PLCB2|29964|AT | 0.876494 | 8.617832 | 0.069778 | 1064.336 | 0.380761 |
| SLFN12|40298|AP | 0.876343 | 1.444207 | 0.634767 | 3.285827 | 0.380844 |
| GBP2|3713|AP | -0.87586 | 0.455054 | 0.078142 | 2.649963 | 0.381109 |
| DDX55|25093|ES | 0.875642 | 4.686515 | 0.147664 | 148.7389 | 0.381225 |
| SCRN2|42120|RI | 0.875045 | 1.494659 | 0.607568 | 3.676962 | 0.381549 |
| CGREF1|52933|AT | 0.874375 | 1.624001 | 0.547702 | 4.815354 | 0.381914 |
| CGREF1|52934|AT | -0.87433 | 0.61578 | 0.207675 | 1.825859 | 0.381941 |
| GABPA|60278|AP | 0.873798 | 1.44635 | 0.632082 | 3.309581 | 0.382228 |
| ANXA6|74148|ES | -0.87233 | 0.627077 | 0.219756 | 1.789376 | 0.383027 |
| ZNF814|95404|ES | 0.871905 | 1.616139 | 0.549335 | 4.754664 | 0.38326 |
| TMEM25|19005|AP | -0.8717 | 0.632305 | 0.225591 | 1.772274 | 0.383372 |
| MAP3K8|11122|AT | 0.870685 | 1.52756 | 0.588582 | 3.964513 | 0.383926 |
| MAP3K8|11123|AT | -0.87068 | 0.654639 | 0.252238 | 1.698999 | 0.383926 |
| SEPT8|73299|AT | -0.87045 | 0.203263 | 0.005624 | 7.346411 | 0.384053 |
| CLDND1|65752|AT | 0.870287 | 28.39271 | 0.015152 | 53205.62 | 0.384143 |
| HHAT|9697|ES | -0.87023 | 0.487859 | 0.096886 | 2.45655 | 0.384172 |
| RPUSD1|33006|AP | 0.870093 | 1.83171 | 0.468541 | 7.160874 | 0.38425 |
| MRPL55|117454|ES | -0.87 | 0.700685 | 0.314422 | 1.561465 | 0.384298 |
| ABI3|42287|AD | 0.869724 | 6.148901 | 0.102614 | 368.4597 | 0.384451 |
| ZNF671|52331|RI | -0.86944 | 0.805402 | 0.494469 | 1.311856 | 0.384604 |
| PISD|61884|ES | -0.86937 | 0.640068 | 0.234082 | 1.750187 | 0.384647 |
| PACRGL|68925|AD | -0.86918 | 0.748255 | 0.389078 | 1.439009 | 0.384751 |
| IFNAR1|60399|AP | -0.86915 | 0.666708 | 0.267243 | 1.663279 | 0.384763 |
| CNIH4|9954|AA | 0.868612 | 2.394034 | 0.333925 | 17.16373 | 0.385059 |
| PTBP2|3832|ES | -0.86771 | 0.796529 | 0.476474 | 1.331572 | 0.385553 |
| ICAM3|47503|RI | 0.867432 | 1.317829 | 0.706378 | 2.458558 | 0.385705 |
| CEP57L1|77160|AT | -0.8671 | 0.343707 | 0.030747 | 3.842113 | 0.385886 |
| CASP8|56827|ES | -0.86667 | 0.638703 | 0.231731 | 1.760409 | 0.386123 |
| GRK6|74765|AA | 0.866284 | 1.883915 | 0.449507 | 7.895624 | 0.386335 |
| TYMP|62852|AA | -0.86569 | 0.635045 | 0.227166 | 1.775275 | 0.386661 |
| FN1|57397|ES | -0.86507 | 0.557933 | 0.148737 | 2.09288 | 0.387001 |
| FOXM1|19721|ES | -0.86318 | 0.718836 | 0.339694 | 1.521149 | 0.38804 |
| ADCK2|82013|AT | 0.862306 | 10.44089 | 0.050491 | 2159.043 | 0.388519 |
| ZBTB17|782|ES | -0.86229 | 0.244851 | 0.009997 | 5.996747 | 0.388529 |
| IGFLR1|49261|ES | -0.86106 | 0.371092 | 0.038862 | 3.543552 | 0.389206 |
| TACC2|13333|AP | -0.86102 | 0.586371 | 0.173964 | 1.976451 | 0.389225 |
| C1orf85|8233|ES | -0.86068 | 0.499838 | 0.103038 | 2.42472 | 0.389413 |
| C2ORF15|54671|AT | 0.860474 | 2.360445 | 0.333733 | 16.69509 | 0.389528 |
| ARHGEF12|19165|ES | 0.860346 | 1.471898 | 0.610145 | 3.550769 | 0.389598 |
| FUZ|51080|ES | 0.860246 | 142.813 | 0.00176 | 11591481 | 0.389653 |
| CRISPLD1|84228|AP | -0.85969 | 0.63645 | 0.227183 | 1.783009 | 0.389962 |
| MTHFD2L|69499|AT | 0.859481 | 1.795764 | 0.472562 | 6.824018 | 0.390075 |
| IL15RA|10675|AP | -0.85916 | 0.690593 | 0.296789 | 1.606932 | 0.390253 |
| MFF|57804|ES | -0.85824 | 0.450308 | 0.072816 | 2.784781 | 0.390761 |
| EPS15L1|48153|AT | 0.857481 | 2.025833 | 0.403453 | 10.1722 | 0.391179 |
| PLA2G7|76420|AP | -0.85748 | 0.573002 | 0.16046 | 2.046187 | 0.39118 |
| PKMYT1|33327|AT | 0.857085 | 1.962022 | 0.420102 | 9.163328 | 0.391398 |
| PIGG|68372|AD | -0.85698 | 0.653698 | 0.247249 | 1.728304 | 0.391455 |
| TGIF1|44506|AA | -0.85638 | 0.007919 | 1.23E-07 | 510.4005 | 0.391786 |
| SPATA33|38105|AP | -0.85636 | 0.703248 | 0.314186 | 1.574096 | 0.391796 |
| IL15RA|10674|AP | 0.854627 | 1.445504 | 0.620923 | 3.365123 | 0.392758 |
| PHKG2|36173|AP | -0.85371 | 0.254549 | 0.011003 | 5.888603 | 0.393265 |
| ATP5J|60266|AD | -0.85358 | 0.479241 | 0.088523 | 2.594491 | 0.393335 |
| SRSF7|53274|ES | 0.853328 | 5.944117 | 0.099112 | 356.4903 | 0.393477 |
| TCF3|94886|ES | 0.852876 | 1.583671 | 0.550582 | 4.555204 | 0.393728 |
| USP54|12165|ES | 0.852665 | 1.881369 | 0.440108 | 8.042459 | 0.393845 |
| GPR132|29598|ES | -0.85262 | 0.819159 | 0.517873 | 1.295727 | 0.393871 |
| MEGF8|50157|ES | 0.851594 | 1.61008 | 0.538001 | 4.818503 | 0.39444 |
| TTLL3|63199|AP | -0.85157 | 0.60826 | 0.193709 | 1.909983 | 0.394455 |
| BOC|66195|AA | -0.85098 | 0.503792 | 0.103868 | 2.443555 | 0.394781 |
| QKI|78407|RI | -0.84866 | 0.786029 | 0.45077 | 1.370637 | 0.396073 |
| PXK|65435|AT | 0.847465 | 3.789602 | 0.173963 | 82.55228 | 0.396736 |
| E2F5|84325|AP | -0.84601 | 0.251579 | 0.010285 | 6.153665 | 0.397545 |
| ATP5D|46401|RI | 0.845822 | 1.732211 | 0.484962 | 6.187191 | 0.397652 |
| PHKB|36324|ES | -0.84313 | 0.582061 | 0.165427 | 2.048005 | 0.399157 |
| KLK10|51264|AP | -0.84309 | 0.755528 | 0.393744 | 1.449732 | 0.399181 |
| CHID1|13804|AP | -0.84293 | 0.594244 | 0.177172 | 1.99313 | 0.399266 |
| DMKN|49204|ES | 0.842622 | 1.725391 | 0.485154 | 6.136137 | 0.39944 |
| CCDC159|47684|ES | 0.842458 | 18.78954 | 0.020425 | 17284.64 | 0.399532 |
| ABI1|11041|ES | -0.84189 | 0.571578 | 0.155429 | 2.101927 | 0.39985 |
| IQCE|78628|ES | -0.84033 | 0.551597 | 0.137717 | 2.2093 | 0.400722 |
| TOM1L1|42538|AT | 0.840326 | 1.903849 | 0.424055 | 8.547581 | 0.400726 |
| ARHGAP15|55491|AT | -0.84018 | 0.104322 | 0.000535 | 20.33795 | 0.40081 |
| DLG4|38845|AP | -0.84017 | 0.358027 | 0.032605 | 3.931401 | 0.400812 |
| GRINA|85522|AD | -0.84014 | 0.370414 | 0.036515 | 3.75752 | 0.400831 |
| UAP1|8750|ES | -0.83924 | 0.419495 | 0.055162 | 3.190157 | 0.401335 |
| SLC10A7|70776|ES | -0.83878 | 0.469088 | 0.079999 | 2.750599 | 0.401592 |
| ACAA2|45492|AD | 0.838694 | 2.771355 | 0.25595 | 30.00747 | 0.401641 |
| ZDHHC7|37873|ES | -0.83724 | 0.625689 | 0.208755 | 1.875342 | 0.402458 |
| PIGC|9005|RI | 0.83709 | 1.248092 | 0.742839 | 2.096998 | 0.402542 |
| CCDC106|52128|AA | -0.83685 | 0.740651 | 0.366641 | 1.496188 | 0.402674 |
| ARHGEF11|8338|ES | -0.83632 | 0.662426 | 0.252326 | 1.739052 | 0.402976 |
| NME9|66980|AT | 0.836014 | 1.213813 | 0.770663 | 1.911786 | 0.403147 |
| STRADA|42976|ES | -0.83563 | 0.78464 | 0.444244 | 1.385861 | 0.403362 |
| ZSCAN1|52384|AT | -0.83547 | 0.542209 | 0.128983 | 2.279287 | 0.403455 |
| FABP5|84288|AP | 0.834713 | 79.38777 | 0.002748 | 2293556 | 0.40388 |
| TNFRSF14|286|AP | -0.83418 | 0.067645 | 0.000121 | 37.90209 | 0.404178 |
| APH1A|7452|ES | -0.83361 | 0.762611 | 0.403253 | 1.442209 | 0.404499 |
| GSN|87421|AP | 0.833578 | 1.362174 | 0.658592 | 2.8174 | 0.404519 |
| STAMBP|53984|AP | 0.833498 | 1.620418 | 0.520824 | 5.041543 | 0.404564 |
| TPM1|30979|AP | -0.83306 | 0.744465 | 0.371818 | 1.490591 | 0.404808 |
| BBC3|50632|AP | 0.832607 | 1.712125 | 0.482826 | 6.071276 | 0.405067 |
| LEPROTL1|83272|AT | 0.83233 | 2.645079 | 0.267722 | 26.13326 | 0.405222 |
| FAHD2A|54505|ES | 0.832235 | 1.549362 | 0.552499 | 4.344849 | 0.405276 |
| BCAM|50346|AT | -0.83101 | 0.275123 | 0.013111 | 5.773188 | 0.405966 |
| TTC3|60551|ES | -0.83095 | 0.787976 | 0.449176 | 1.382322 | 0.406004 |
| NDUFA3|51774|AT | -0.83057 | 0.600523 | 0.180264 | 2.000547 | 0.406214 |
| CCDC25|83176|ES | -0.82989 | 0.069219 | 0.000126 | 37.95682 | 0.406602 |
| ECHDC2|3025|AA | 0.829209 | 1.679882 | 0.492944 | 5.724791 | 0.406986 |
| NR4A2|55614|AP | 0.829204 | 1.307342 | 0.693879 | 2.463171 | 0.406989 |
| FAM98B|29919|AT | -0.8289 | 0.170697 | 0.002611 | 11.15954 | 0.407159 |
| KIAA1217|11006|ES | 0.828873 | 1.606887 | 0.523492 | 4.932426 | 0.407176 |
| NFASC|9493|AT | -0.82835 | 0.774625 | 0.423321 | 1.417471 | 0.407475 |
| NFASC|9492|AT | 0.828345 | 1.290947 | 0.705482 | 2.362276 | 0.407475 |
| LACC1|25775|AP | 0.827938 | 1.377871 | 0.645153 | 2.942758 | 0.407706 |
| BRE|95458|ME | -0.82784 | 0.585834 | 0.165183 | 2.077705 | 0.407762 |
| TTLL3|63203|AP | 0.827556 | 1.621265 | 0.516227 | 5.091758 | 0.407922 |
| DPY19L3|48873|AP | 0.827019 | 1.3592 | 0.65677 | 2.812892 | 0.408226 |
| PPM1M|65193|ES | 0.827016 | 2.254616 | 0.328335 | 15.48202 | 0.408228 |
| MTF2|3770|ES | -0.82624 | 0.413481 | 0.05089 | 3.359522 | 0.408667 |
| VPS9D1|38130|AP | -0.82622 | 0.716758 | 0.325302 | 1.579279 | 0.40868 |
| VPS9D1|38131|AP | 0.826197 | 1.395159 | 0.633194 | 3.074047 | 0.408692 |
| CXCL12|11347|ES | 0.825491 | 3.964658 | 0.150621 | 104.3581 | 0.409093 |
| CYTH4|62107|AT | 0.824838 | 4.485641 | 0.126757 | 158.7364 | 0.409463 |
| RARS2|76964|ES | 0.824825 | 2.894813 | 0.231584 | 36.18526 | 0.409471 |
| CRIP1|29655|AA | 0.824281 | 1.410453 | 0.622609 | 3.195224 | 0.40978 |
| FKBP11|21495|AT | -0.82329 | 0.639361 | 0.220442 | 1.854377 | 0.410345 |
| P4HA3|17767|AT | -0.82285 | 0.6963 | 0.294 | 1.649093 | 0.410596 |
| MAP7|77914|AP | 0.822441 | 2.099533 | 0.358485 | 12.2963 | 0.410826 |
| RARRES1|67449|AT | 0.822149 | 2.767135 | 0.244484 | 31.31913 | 0.410992 |
| FGFR2|13317|ES | 0.821307 | 1.400756 | 0.626735 | 3.130696 | 0.411471 |
| DCAF6|91279|ES | 0.821283 | 1.335405 | 0.66964 | 2.663083 | 0.411485 |
| PUM2|52774|ES | 0.820997 | 1.565255 | 0.537097 | 4.561605 | 0.411648 |
| ANKRD27|48899|ES | 0.819751 | 2.344609 | 0.305674 | 17.98381 | 0.412358 |
| EEF1E1|75282|AT | 0.819425 | 2.657599 | 0.256544 | 27.53063 | 0.412544 |
| COL1A1|265410|ES | -0.81926 | 0.567199 | 0.146076 | 2.20238 | 0.412641 |
| SET|87776|AP | -0.81862 | 0.496509 | 0.092877 | 2.654268 | 0.413002 |
| CAMLG|73422|ES | 0.816215 | 3.307582 | 0.187076 | 58.47954 | 0.414377 |
| FAIM|67016|ES | 0.814595 | 1.456102 | 0.58958 | 3.596178 | 0.415304 |
| UBA2|48969|ES | 0.813821 | 2.729981 | 0.243072 | 30.6608 | 0.415747 |
| KDM4C|85822|AP | -0.813 | 0.73778 | 0.354428 | 1.535772 | 0.416219 |
| PIK3C3|45313|AP | -0.81296 | 0.645871 | 0.225127 | 1.852953 | 0.41624 |
| TMUB2|41795|AD | 0.812771 | 5.263198 | 0.095937 | 288.7445 | 0.416349 |
| LETMD1|21744|ES | -0.81044 | 0.47767 | 0.080008 | 2.851815 | 0.417686 |
| FOXN3|28790|AP | -0.81039 | 0.473795 | 0.077802 | 2.885291 | 0.417716 |
| PLAT|83578|ES | -0.81035 | 0.207589 | 0.004632 | 9.303525 | 0.417736 |
| CDKL3|73368|AT | -0.80968 | 0.647674 | 0.226315 | 1.853525 | 0.418123 |
| HNRNPA2B1|1039597|ES | 0.809076 | 1.488955 | 0.567651 | 3.905545 | 0.418471 |
| SETD5|63099|ES | -0.80856 | 0.718587 | 0.32254 | 1.600941 | 0.418767 |
| MLF1|67438|AD | 0.808311 | 1.406052 | 0.615365 | 3.212695 | 0.418912 |
| RGS12|68633|AP | 0.808255 | 1.264198 | 0.716012 | 2.232082 | 0.418944 |
| MBNL2|26141|ES | -0.80814 | 0.783147 | 0.432895 | 1.416783 | 0.41901 |
| RAB34|114421|ES | 0.807843 | 1.801283 | 0.432013 | 7.510469 | 0.419181 |
| CASP10|56801|AT | 0.807093 | 2.308083 | 0.302777 | 17.59464 | 0.419613 |
| RPE|57252|ES | 0.806131 | 7.123959 | 0.060184 | 843.2582 | 0.420167 |
| TNPO1|72474|AP | 0.805736 | 1.471914 | 0.574785 | 3.769288 | 0.420395 |
| PDZK1IP1|2895|ES | 0.805478 | 4.094701 | 0.132589 | 126.4554 | 0.420544 |
| FAM19A2|22823|AP | 0.805407 | 1.251104 | 0.725319 | 2.15803 | 0.420585 |
| VPS39|30131|ES | -0.80489 | 0.755559 | 0.381805 | 1.495184 | 0.420885 |
| BCAS3|42864|AP | 0.804815 | 1.342139 | 0.6555 | 2.748034 | 0.420926 |
| PPHLN1|21221|ES | -0.8047 | 0.627258 | 0.201419 | 1.953406 | 0.42099 |
| AIFM2|12030|AT | -0.8046 | 0.421744 | 0.051486 | 3.454663 | 0.421048 |
| REPIN1|82248|ES | -0.80379 | 0.601895 | 0.174544 | 2.075567 | 0.421517 |
| VPS29|24444|ES | -0.80307 | 0.668806 | 0.250569 | 1.785142 | 0.421937 |
| ARPP19|30683|ES | 0.803049 | 1.455962 | 0.582046 | 3.642022 | 0.421947 |
| PREPL|53443|ES | -0.8026 | 0.773648 | 0.413393 | 1.447848 | 0.422207 |
| GOLM1|86743|AP | -0.80189 | 0.533123 | 0.11459 | 2.480333 | 0.422616 |
| ARHGEF10L|862|ES | 0.801629 | 1.462382 | 0.577419 | 3.70366 | 0.422768 |
| BCAS3|42865|AP | -0.79939 | 0.746481 | 0.364486 | 1.528819 | 0.424067 |
| PHC1|20216|ES | 0.799133 | 24.52199 | 0.009583 | 62747.63 | 0.424213 |
| DNAJC19|67762|ES | -0.79833 | 0.141141 | 0.001153 | 17.27142 | 0.42468 |
| ACPP|66802|AT | -0.79763 | 0.689312 | 0.276292 | 1.719743 | 0.425083 |
| ACPP|66803|AT | 0.797635 | 1.450721 | 0.581482 | 3.619357 | 0.425083 |
| TCTN1|24480|ES | -0.79634 | 0.251335 | 0.008397 | 7.522395 | 0.425833 |
| NEK11|66789|ES | -0.79551 | 0.714427 | 0.311992 | 1.635958 | 0.426315 |
| DUSP10|9882|ES | 0.794778 | 4.127596 | 0.125128 | 136.1564 | 0.426743 |
| CCDC80|66114|AD | 0.794533 | 2.213649 | 0.311738 | 15.7191 | 0.426885 |
| PSMA3|27693|AA | 0.793252 | 176.1518 | 0.000497 | 62375845 | 0.427631 |
| NAGK|53923|ES | -0.7931 | 0.05198 | 3.49E-05 | 77.50811 | 0.427719 |
| FAM86A|33893|ES | -0.79226 | 0.637818 | 0.209671 | 1.940238 | 0.428208 |
| SORBS2|71383|ES | 0.791765 | 1.677831 | 0.466013 | 6.040851 | 0.428498 |
| KLC1|29478|AD | 0.791693 | 1.605825 | 0.497117 | 5.187259 | 0.42854 |
| KIAA1715|56097|AP | 0.790759 | 1.724334 | 0.446822 | 6.654389 | 0.429085 |
| SETMAR|62992|AT | 0.790371 | 2.836097 | 0.213827 | 37.61658 | 0.429311 |
| PCNXL4|27767|AT | -0.79012 | 0.256635 | 0.008792 | 7.491406 | 0.429458 |
| BRD8|73507|ES | 0.789616 | 1.772473 | 0.428117 | 7.338327 | 0.429752 |
| CDC25B|58600|AP | -0.78849 | 0.517698 | 0.100775 | 2.659503 | 0.430409 |
| TNPO1|72475|AP | -0.78792 | 0.685823 | 0.268403 | 1.752418 | 0.430744 |
| HOXC4|22118|AP | -0.78732 | 0.699642 | 0.287545 | 1.702338 | 0.431097 |
| BRF1|122508|ES | 0.787143 | 1.96125 | 0.36655 | 10.49378 | 0.431198 |
| FCGRT|50966|ES | -0.78667 | 0.678758 | 0.258486 | 1.782351 | 0.431476 |
| EXOSC9|70501|RI | -0.78663 | 0.765422 | 0.393215 | 1.489952 | 0.431498 |
| SGCD|74304|AT | -0.78592 | 0.702933 | 0.291838 | 1.693112 | 0.431913 |
| GRAMD1A|49013|ES | 0.785723 | 10.32919 | 0.030514 | 3496.457 | 0.43203 |
| VIMP|32757|AT | -0.78558 | 0.206331 | 0.004022 | 10.58444 | 0.432111 |
| TMX2|15919|ES | -0.78488 | 0.720313 | 0.317489 | 1.634234 | 0.432527 |
| FNTA|83757|ES | 0.784141 | 12.55483 | 0.022508 | 7003.158 | 0.432957 |
| CUX1|81071|AT | -0.784 | 0.386906 | 0.036028 | 4.154983 | 0.433039 |
| SLC35D1|3347|AT | -0.78352 | 0.169309 | 0.001992 | 14.39191 | 0.43332 |
| SLC2A6|88069|ES | 0.783 | 1.458493 | 0.567058 | 3.751294 | 0.433627 |
| IL18BP|17503|AD | 0.782774 | 1.239307 | 0.724221 | 2.120734 | 0.43376 |
| DENND1B|9307|ES | 0.782727 | 1.338275 | 0.645169 | 2.775985 | 0.433788 |
| ZFYVE28|68563|ES | 0.782237 | 2.225774 | 0.299804 | 16.52438 | 0.434075 |
| SGCD|74302|AT | 0.781907 | 1.420159 | 0.589497 | 3.421309 | 0.434269 |
| MIER1|3332|AP | 0.781644 | 1.387022 | 0.610676 | 3.15033 | 0.434424 |
| COL1A1|265399|ES | -0.78147 | 0.606313 | 0.17286 | 2.126668 | 0.434523 |
| COL1A1|406642|ES | -0.78017 | 0.571021 | 0.139736 | 2.333432 | 0.435289 |
| SHISA5|64685|AP | 0.779383 | 13.18412 | 0.020109 | 8644.006 | 0.435754 |
| EXOC7|43569|ES | -0.77823 | 0.749627 | 0.362781 | 1.548979 | 0.436433 |
| ARL6IP4|25035|AD | 0.778012 | 2.216093 | 0.298528 | 16.45096 | 0.436562 |
| CMTM7|63816|ES | -0.7778 | 0.447942 | 0.059202 | 3.389245 | 0.436687 |
| GATAD2A|48634|ES | 0.777579 | 2.342252 | 0.274117 | 20.01391 | 0.436817 |
| ARHGAP9|22582|AP | -0.77735 | 0.731827 | 0.333069 | 1.607987 | 0.436955 |
| FCGRT|120865|ES | 0.776532 | 1.323764 | 0.652171 | 2.686953 | 0.437435 |
| CHTF8|94189|ES | 0.77614 | 1.439494 | 0.573703 | 3.611872 | 0.437666 |
| FDPS|8073|ES | -0.77521 | 0.60724 | 0.17204 | 2.143338 | 0.438216 |
| MFAP5|20195|ES | 0.773902 | 1.364542 | 0.621044 | 2.998135 | 0.438989 |
| CNKSR2|88672|AT | -0.77349 | 0.487178 | 0.078762 | 3.013428 | 0.439231 |
| TNFRSF25|430|ES | 0.773216 | 1.330273 | 0.645317 | 2.742261 | 0.439395 |
| ABL2|9101|AP | -0.77258 | 0.768626 | 0.394261 | 1.498464 | 0.439773 |
| TPM3|7785|AP | 0.771928 | 9.174997 | 0.032999 | 2551.003 | 0.440157 |
| MYLK|66479|AP | -0.77142 | 0.83577 | 0.529823 | 1.318388 | 0.440461 |
| SUCLA2|25849|AP | -0.77027 | 0.720527 | 0.312923 | 1.659061 | 0.441141 |
| MRPS16|12136|AT | -0.76928 | 0.522544 | 0.099992 | 2.730752 | 0.441724 |
| MRPS16|12135|AT | 0.76923 | 1.913626 | 0.366183 | 10.00036 | 0.441756 |
| PTCH2|2586|AT | 0.768367 | 1.339087 | 0.635833 | 2.820166 | 0.442269 |
| PTCH2|2587|AT | -0.76831 | 0.746795 | 0.354597 | 1.572778 | 0.442306 |
| CREB3L2|81911|AT | -0.76817 | 0.405297 | 0.04046 | 4.059987 | 0.442384 |
| PTK7|76251|ES | -0.76813 | 0.752423 | 0.364116 | 1.554833 | 0.442412 |
| PAM|72893|ES | 0.767823 | 7.298103 | 0.045683 | 1165.899 | 0.442592 |
| RPLP1|31403|ES | 0.767368 | 102.7448 | 0.000747 | 14127802 | 0.442863 |
| MYO9B|48232|ES | 0.76683 | 1.598931 | 0.481788 | 5.306443 | 0.443182 |
| PTCHD4|76446|AT | -0.76562 | 0.699495 | 0.28018 | 1.746354 | 0.443904 |
| RABEPK|87550|AP | 0.765459 | 1.52404 | 0.518123 | 4.482913 | 0.443998 |
| RABEPK|87549|AP | -0.76529 | 0.656213 | 0.223091 | 1.930218 | 0.444099 |
| BCOR|88823|AP | 0.765166 | 1.614659 | 0.473243 | 5.50906 | 0.444173 |
| CTNND1|15935|ES | -0.76413 | 0.756095 | 0.369088 | 1.548896 | 0.444789 |
| RNFT1|42842|ES | 0.76402 | 1.571363 | 0.492904 | 5.00946 | 0.444855 |
| PRRC2B|87934|ES | 0.763231 | 1.74378 | 0.418163 | 7.271738 | 0.445325 |
| KANSL3|54543|ES | -0.76221 | 0.474188 | 0.069611 | 3.230148 | 0.445936 |
| ATP5J|60276|AD | -0.76208 | 0.601636 | 0.162859 | 2.222575 | 0.446012 |
| GSN|87422|AP | -0.76173 | 0.760734 | 0.376392 | 1.537533 | 0.446219 |
| C9orf114|98240|ES | 0.76121 | 2.999014 | 0.177359 | 50.71104 | 0.446531 |
| CDCA8|1821|RI | -0.76043 | 0.620874 | 0.181754 | 2.120914 | 0.446996 |
| MAPKAPK5|93328|ES | -0.76032 | 0.325324 | 0.017995 | 5.881363 | 0.447065 |
| PIK3R2|48398|AT | -0.75985 | 0.473877 | 0.069035 | 3.252819 | 0.447346 |
| SGK1|77770|AP | 0.759619 | 2.257479 | 0.276189 | 18.45191 | 0.447482 |
| PHF15|73404|AA | -0.75866 | 0.666178 | 0.233264 | 1.902541 | 0.448054 |
| MFF|57799|ES | -0.75842 | 0.701943 | 0.281257 | 1.75186 | 0.448199 |
| PPP2R4|87857|ES | 0.757429 | 1.497355 | 0.526799 | 4.256024 | 0.448793 |
| SMAD2|45447|AP | 0.757256 | 1.889997 | 0.363841 | 9.817717 | 0.448896 |
| SMAD2|45448|AP | -0.75726 | 0.529101 | 0.101857 | 2.748452 | 0.448896 |
| HMHA1|46375|AP | -0.75709 | 0.786453 | 0.422269 | 1.464724 | 0.448994 |
| NFATC1|46241|AD | 0.75578 | 1.398999 | 0.585692 | 3.341683 | 0.449781 |
| FCGRT|95308|ES | 0.754954 | 1.353801 | 0.616624 | 2.972276 | 0.450277 |
| FGD4|21030|AP | 0.754831 | 1.316949 | 0.644319 | 2.691765 | 0.450351 |
| DGUOK|54012|ES | 0.754354 | 1.702948 | 0.427065 | 6.790614 | 0.450637 |
| SAA2|14580|AT | -0.75406 | 0.713977 | 0.297424 | 1.713928 | 0.450816 |
| YWHAZ|84732|ES | 0.753925 | 2.356162 | 0.253858 | 21.86853 | 0.450894 |
| PSPC1|25403|AT | 0.753478 | 1.746452 | 0.4095 | 7.448345 | 0.451162 |
| PPFIBP2|14201|AP | -0.75278 | 0.766068 | 0.382775 | 1.533173 | 0.45158 |
| ANKMY1|58259|AA | -0.75154 | 0.557129 | 0.121178 | 2.561466 | 0.45233 |
| TATDN1|85090|ES | -0.75069 | 0.287236 | 0.01106 | 7.459621 | 0.45284 |
| GTF2H1|14599|AP | 0.749354 | 1.419328 | 0.567942 | 3.547003 | 0.453644 |
| GRB7|40698|ES | 0.749105 | 1.913297 | 0.350368 | 10.44817 | 0.453794 |
| RANBP3|46999|ES | -0.74887 | 0.683428 | 0.252375 | 1.850713 | 0.453935 |
| PTCHD4|76445|AT | 0.748788 | 1.418488 | 0.568093 | 3.541864 | 0.453985 |
| AMBRA1|15579|RI | -0.74819 | 0.635484 | 0.193783 | 2.083983 | 0.454346 |
| MKNK1|2815|AD | -0.74772 | 0.670198 | 0.234768 | 1.91323 | 0.454627 |
| C10orf118|13186|AT | 0.746706 | 1.66176 | 0.438145 | 6.302584 | 0.455241 |
| HNRNPR|1048|ES | -0.74637 | 0.557407 | 0.120123 | 2.586545 | 0.455442 |
| COL1A1|257454|ES | 0.746173 | 2.244297 | 0.268474 | 18.76114 | 0.455563 |
| CLCN6|689|ES | 0.746079 | 1.414966 | 0.568504 | 3.521749 | 0.45562 |
| AP1B1|61604|AA | -0.74448 | 0.04097 | 9.11E-06 | 184.2413 | 0.456587 |
| STRA6|31682|AP | 0.742009 | 1.298279 | 0.6515 | 2.587152 | 0.458082 |
| HEATR6|42848|ES | -0.74194 | 0.747533 | 0.346579 | 1.612349 | 0.458125 |
| SPTAN1|87774|ES | -0.7417 | 0.555555 | 0.117533 | 2.626 | 0.45827 |
| ENTPD6|139454|ES | 0.740866 | 1.926629 | 0.33991 | 10.92025 | 0.458774 |
| TMCO1|8810|AD | -0.74031 | 0.102008 | 0.000242 | 42.97982 | 0.459112 |
| BIN1|55195|ES | -0.73964 | 0.661206 | 0.220928 | 1.978894 | 0.459516 |
| OBSL1|57728|AT | 0.738611 | 1.881164 | 0.351733 | 10.06098 | 0.460143 |
| TM4SF19|68240|AT | 0.737618 | 1.337123 | 0.617895 | 2.893533 | 0.460746 |
| CCDC138|54900|ES | -0.73696 | 0.643729 | 0.199499 | 2.077139 | 0.461149 |
| TMEM107|39129|ES | 0.735905 | 1.361442 | 0.598569 | 3.096589 | 0.461788 |
| DGUOK|54003|ES | -0.73587 | 0.621145 | 0.174731 | 2.208085 | 0.461809 |
| SRRM1|1132|AA | -0.73575 | 0.219967 | 0.003895 | 12.42361 | 0.461882 |
| PRSS21|33308|AD | -0.73478 | 0.550458 | 0.111975 | 2.705986 | 0.462476 |
| PLOD2|67137|ES | 0.734148 | 1.295776 | 0.648795 | 2.587929 | 0.462858 |
| C17orf49|38825|ES | -0.73396 | 0.203152 | 0.00288 | 14.32877 | 0.462972 |
| KAZN|731|AP | 0.733466 | 1.418301 | 0.55746 | 3.608473 | 0.463274 |
| CTAGE5|27377|ES | 0.733451 | 1.78675 | 0.378867 | 8.426378 | 0.463283 |
| ALS2CL|64467|AD | 0.732049 | 1.6269 | 0.442049 | 5.987585 | 0.464138 |
| CXorf40A|90314|AD | 0.731932 | 1.364234 | 0.59386 | 3.133965 | 0.46421 |
| GPATCH4|8299|AA | -0.73134 | 0.017308 | 3.29E-07 | 911.3824 | 0.464574 |
| SLC25A22|13760|AP | -0.73113 | 0.725441 | 0.306843 | 1.715097 | 0.464698 |
| CNOT4|81887|ES | 0.731008 | 1.736057 | 0.395594 | 7.618664 | 0.464775 |
| ARMCX4|89650|RI | -0.73091 | 0.801879 | 0.443583 | 1.449584 | 0.464832 |
| CCDC91|99554|ES | -0.73085 | 0.675942 | 0.236467 | 1.932185 | 0.464868 |
| PACRGL|68924|AD | -0.73048 | 0.670025 | 0.228809 | 1.962046 | 0.465096 |
| NUP62|95321|AD | -0.73046 | 0.659243 | 0.215531 | 2.016424 | 0.46511 |
| SUCLA2|25850|AP | 0.730239 | 1.364463 | 0.592548 | 3.141954 | 0.465244 |
| ABR|38286|AP | -0.72986 | 0.785522 | 0.410789 | 1.502099 | 0.465474 |
| IFFO1|19877|AP | -0.72939 | 0.371437 | 0.025948 | 5.316989 | 0.465766 |
| TM2D3|32768|AT | 0.729207 | 2.172686 | 0.269908 | 17.48954 | 0.465875 |
| HNRNPA1|22147|ES | -0.72918 | 0.450991 | 0.05304 | 3.834711 | 0.465892 |
| PCNA|58649|AP | -0.72916 | 0.427783 | 0.043648 | 4.192581 | 0.465902 |
| GLYR1|33865|ES | 0.728883 | 3.554324 | 0.117429 | 107.5822 | 0.466073 |
| QKI|78405|AT | -0.7288 | 0.590712 | 0.143397 | 2.433395 | 0.466122 |
| QKI|78404|AT | 0.728751 | 1.692809 | 0.410932 | 6.973416 | 0.466154 |
| TSPAN4|13790|AP | 0.727039 | 1.512686 | 0.495655 | 4.616557 | 0.467202 |
| MPI|31778|ES | 0.726815 | 26.72319 | 0.003794 | 188237 | 0.467339 |
| HTRA3|68763|AT | 0.726464 | 1.698942 | 0.4066 | 7.098873 | 0.467555 |
| ESRP1|97999|ES | 0.726123 | 1.551867 | 0.473911 | 5.081741 | 0.467763 |
| MOK|29377|RI | 0.726095 | 1.273809 | 0.662817 | 2.448022 | 0.467781 |
| DLG3|89379|AP | -0.72533 | 0.651014 | 0.204116 | 2.076363 | 0.468252 |
| ITGB1BP1|52621|ES | -0.72513 | 0.671452 | 0.228798 | 1.970511 | 0.468373 |
| FAM161A|53703|AA | -0.72492 | 0.6795 | 0.239047 | 1.931506 | 0.468499 |
| FLNB|65419|ES | 0.724478 | 1.211985 | 0.720457 | 2.038857 | 0.468772 |
| DGKZ|15540|AP | 0.724064 | 2.333878 | 0.235359 | 23.14336 | 0.469026 |
| KALRN|66518|AP | -0.72388 | 0.827463 | 0.495502 | 1.381821 | 0.469142 |
| C2ORF15|54670|AP | -0.72381 | 0.516601 | 0.086382 | 3.089504 | 0.469184 |
| MRPL37|3138|AT | 0.723292 | 2.692935 | 0.183826 | 39.44979 | 0.469501 |
| COL1A1|1560803|ES | -0.72324 | 0.522425 | 0.089924 | 3.03511 | 0.469533 |
| FBXO18|10673|ES | -0.72324 | 0.518358 | 0.087353 | 3.075959 | 0.469535 |
| ZNF266|47348|ES | 0.72313 | 1.410292 | 0.555423 | 3.580919 | 0.4696 |
| IFI27L1|29060|ES | -0.72268 | 0.7384 | 0.324405 | 1.680721 | 0.469878 |
| TMEM126A|18130|ES | -0.72169 | 0.130576 | 0.000518 | 32.88516 | 0.470485 |
| IDS|90291|AT | 0.721648 | 1.646161 | 0.425151 | 6.373848 | 0.470511 |
| DNM2|47587|ES | -0.7209 | 0.594497 | 0.144582 | 2.444468 | 0.47097 |
| DMTN|82929|ES | 0.720721 | 5.963384 | 0.046407 | 766.3134 | 0.471081 |
| PDLIM7|74784|ES | 0.719703 | 1.284414 | 0.649634 | 2.539458 | 0.471708 |
| TANK|55731|AP | -0.71953 | 0.801395 | 0.438461 | 1.464748 | 0.471813 |
| PHYH|10789|AP | 0.719459 | 2.885597 | 0.160862 | 51.7629 | 0.471858 |
| TANK|55730|AP | 0.719429 | 1.247785 | 0.68269 | 2.280637 | 0.471876 |
| APRT|38027|AA | 0.719336 | 2.409801 | 0.219383 | 26.47036 | 0.471934 |
| STRADA|42964|AD | -0.71922 | 0.554978 | 0.11153 | 2.761599 | 0.472008 |
| LILRB2|51858|ES | 0.718116 | 4.044265 | 0.089245 | 183.2719 | 0.472686 |
| GCH1|27601|RI | -0.71784 | 0.279 | 0.008549 | 9.105584 | 0.472857 |
| ZNF124|10516|AT | -0.71774 | 0.728757 | 0.307135 | 1.729163 | 0.47292 |
| RGS19|95999|ES | 0.717693 | 2.051809 | 0.288214 | 14.60695 | 0.472947 |
| CEP63|66882|ES | 0.717531 | 1.647657 | 0.421198 | 6.445361 | 0.473047 |
| ANKS1B|23886|AT | 0.717469 | 1.539789 | 0.473543 | 5.006827 | 0.473084 |
| ANKS1B|23885|AT | -0.71744 | 0.649449 | 0.19973 | 2.111773 | 0.4731 |
| ZNF200|33464|AD | -0.71668 | 0.723158 | 0.298036 | 1.754682 | 0.47357 |
| CRTC1|48503|ES | -0.71657 | 0.367436 | 0.023761 | 5.682003 | 0.473641 |
| PARP11|19765|ES | 0.714642 | 1.359723 | 0.585399 | 3.158268 | 0.47483 |
| ULK3|31757|RI | -0.7146 | 0.759083 | 0.356412 | 1.616689 | 0.474858 |
| ABHD14A|103205|ES | 0.713286 | 2.922574 | 0.153439 | 55.66654 | 0.475669 |
| PAM16|33653|AA | 0.712781 | 1.844059 | 0.342738 | 9.921738 | 0.475982 |
| ST3GAL6|65791|AP | 0.712687 | 1.303451 | 0.628887 | 2.701575 | 0.476039 |
| MARK2|16536|AP | -0.71119 | 0.434929 | 0.043847 | 4.314145 | 0.476965 |
| IFI27|29086|ES | 0.710797 | 1.454373 | 0.517738 | 4.085462 | 0.47721 |
| ERMAP|2123|AP | -0.71031 | 0.771123 | 0.376412 | 1.579735 | 0.477512 |
| LIMA1|21691|AP | 0.710058 | 1.244312 | 0.680608 | 2.274897 | 0.477668 |
| DHPS|47837|AD | -0.70895 | 0.016166 | 1.80E-07 | 1449.043 | 0.478354 |
| ATG13|15594|ES | -0.7067 | 0.557387 | 0.110192 | 2.819437 | 0.479751 |
| APOC1|50368|ES | 0.706466 | 1.336481 | 0.597725 | 2.9883 | 0.479899 |
| DMKN|49171|ES | 0.706387 | 2.887146 | 0.152349 | 54.71409 | 0.479947 |
| CHKA|17289|ES | -0.70604 | 0.363837 | 0.021978 | 6.023211 | 0.480163 |
| TNIP1|74126|AP | -0.70575 | 0.767025 | 0.367206 | 1.602172 | 0.480343 |
| PCBD2|73438|AT | -0.70531 | 0.44154 | 0.04554 | 4.281 | 0.480614 |
| EIF4G1|67905|ES | 0.704815 | 13.31519 | 0.009948 | 17821.94 | 0.480925 |
| TNIP1|74127|AP | 0.70446 | 1.303584 | 0.623443 | 2.725721 | 0.481147 |
| SEPT6|89963|AT | 0.704079 | 1.599048 | 0.43288 | 5.906847 | 0.481383 |
| SNX3|77149|AD | -0.7029 | 0.012084 | 5.43E-08 | 2690.011 | 0.482117 |
| REXO2|18830|AP | 0.702544 | 5.258875 | 0.051255 | 539.5688 | 0.48234 |
| NDUFS1|57126|ES | 0.702307 | 12.32043 | 0.011142 | 13623.54 | 0.482488 |
| TBL1XR1|96573|ES | -0.7018 | 0.570557 | 0.11904 | 2.734665 | 0.482807 |
| IKBKE|91361|ES | -0.70178 | 0.49626 | 0.070125 | 3.511937 | 0.482817 |
| AKAP8L|48076|ES | 0.701713 | 1.407708 | 0.541627 | 3.658687 | 0.482858 |
| DMKN|49167|ES | 0.701516 | 1.23814 | 0.68168 | 2.248844 | 0.482981 |
| FAM47E|69600|AP | -0.70145 | 0.814821 | 0.459785 | 1.444008 | 0.483024 |
| MRPL34|48272|AP | -0.70116 | 0.16058 | 0.000967 | 26.67171 | 0.483206 |
| TMEM25|19014|ES | 0.700202 | 1.46062 | 0.505795 | 4.217934 | 0.483801 |
| TSC22D3|89836|AP | 0.699222 | 1.747936 | 0.365351 | 8.362585 | 0.484413 |
| TUFT1|7640|ES | 0.698773 | 1.270245 | 0.649377 | 2.48472 | 0.484694 |
| FAM47E|69599|AP | 0.698491 | 1.226174 | 0.69195 | 2.17285 | 0.48487 |
| ABCA6|43161|AT | -0.69814 | 0.743701 | 0.323862 | 1.707798 | 0.485091 |
| NR4A1|21884|AP | 0.698108 | 1.918544 | 0.307977 | 11.95156 | 0.485109 |
| FDPS|8064|ES | 0.69761 | 1.821444 | 0.337883 | 9.818938 | 0.485421 |
| CCDC107|86266|RI | -0.69752 | 0.579179 | 0.124836 | 2.687107 | 0.485477 |
| TRA2A|78977|ES | -0.69748 | 0.743342 | 0.323015 | 1.710625 | 0.4855 |
| ATAD2|85054|AP | 0.697391 | 1.619872 | 0.417591 | 6.283626 | 0.485558 |
| FBXO18|10669|AP | -0.69631 | 0.549894 | 0.102145 | 2.960346 | 0.486237 |
| PDE4DIP|4408|AP | -0.69621 | 0.785139 | 0.397376 | 1.551282 | 0.486295 |
| CTTNBP2|81577|AD | 0.696037 | 1.466221 | 0.499114 | 4.30724 | 0.486406 |
| C1orf85|8221|AT | -0.69316 | 0.575244 | 0.120453 | 2.747186 | 0.488209 |
| MAGED2|89247|AP | -0.6925 | 0.730552 | 0.300433 | 1.776458 | 0.488623 |
| HAUS2|30189|ES | -0.69066 | 0.700411 | 0.254974 | 1.924025 | 0.489778 |
| CADM1|18851|ES | -0.69052 | 0.73806 | 0.311662 | 1.747831 | 0.489868 |
| MIS12|38715|AP | -0.6899 | 0.567781 | 0.113718 | 2.834867 | 0.490254 |
| SC5D|19180|AP | -0.68962 | 0.6858 | 0.234777 | 2.003272 | 0.490434 |
| PALM|46315|ES | 0.689332 | 1.359728 | 0.567558 | 3.257567 | 0.490615 |
| FLVCR2|28505|AP | 0.689038 | 1.641176 | 0.401003 | 6.7168 | 0.490799 |
| RAN|25206|ES | 0.688861 | 93.76002 | 0.00023 | 38269282 | 0.490911 |
| SCAF11|21317|AT | -0.68881 | 0.592663 | 0.133768 | 2.625809 | 0.49094 |
| WASF1|77223|ES | -0.68778 | 0.754274 | 0.337696 | 1.684739 | 0.49159 |
| SLC6A11|63375|AT | -0.68673 | 0.824847 | 0.476102 | 1.429048 | 0.492251 |
| CRB2|87508|AP | -0.6858 | 0.821656 | 0.468684 | 1.440457 | 0.492841 |
| FN1|384489|ES | 0.684954 | 1.557559 | 0.438302 | 5.534977 | 0.493373 |
| LIG4|26235|AP | -0.68447 | 0.794215 | 0.410593 | 1.536259 | 0.493681 |
| MRC2|42909|AP | 0.684449 | 1.617519 | 0.408127 | 6.410667 | 0.493692 |
| ABI1|11042|ES | -0.68413 | 0.747261 | 0.324327 | 1.721715 | 0.493892 |
| PMF1|8195|AT | -0.68382 | 0.209537 | 0.002376 | 18.47843 | 0.49409 |
| KALRN|66523|AT | 0.683811 | 1.561591 | 0.435269 | 5.602438 | 0.494095 |
| ZNF544|52430|ES | -0.68377 | 0.723039 | 0.285404 | 1.831737 | 0.494122 |
| RNF166|38014|AP | 0.682706 | 1.310065 | 0.603337 | 2.844631 | 0.494793 |
| ATG16L1|58038|ES | 0.682537 | 1.286866 | 0.623733 | 2.655021 | 0.494899 |
| UBE2E2|63710|AP | -0.68081 | 0.523447 | 0.081197 | 3.374465 | 0.495993 |
| HKR1|49480|AT | -0.68062 | 0.384447 | 0.024508 | 6.03076 | 0.496112 |
| NSMF|88316|ES | -0.68049 | 0.145171 | 0.00056 | 37.65745 | 0.496194 |
| PCDH7|68993|AT | -0.6798 | 0.782391 | 0.38561 | 1.587446 | 0.496632 |
| CCDC92|25121|AP | 0.679113 | 2.060059 | 0.25586 | 16.58655 | 0.497066 |
| GPR35|58296|AP | 0.679049 | 1.245282 | 0.66114 | 2.345535 | 0.497107 |
| DEPDC1|3369|ES | -0.67865 | 0.698093 | 0.247244 | 1.97106 | 0.497362 |
| POLR3H|62433|ES | -0.67834 | 0.097173 | 0.000115 | 81.82719 | 0.497559 |
| SAR1B|73415|AP | -0.67818 | 0.727893 | 0.290695 | 1.822629 | 0.497659 |
| FAM47E|69602|AT | -0.67775 | 0.754523 | 0.334129 | 1.703847 | 0.497933 |
| FAM47E|69601|AT | 0.677745 | 1.325341 | 0.586907 | 2.992858 | 0.497933 |
| DMKN|49155|ES | 0.677579 | 1.334558 | 0.579144 | 3.075309 | 0.498038 |
| INHBA|79309|AP | -0.67746 | 0.782523 | 0.384923 | 1.59082 | 0.498114 |
| NUMA1|17515|ES | 0.676946 | 1.370624 | 0.550172 | 3.414582 | 0.49844 |
| WNK2|98174|ES | -0.67623 | 0.757741 | 0.339101 | 1.693219 | 0.498894 |
| LPAR5|19899|AP | 0.675852 | 1.272849 | 0.632303 | 2.562293 | 0.499135 |
| EPB41L1|59264|AP | 0.675223 | 1.224723 | 0.679972 | 2.205895 | 0.499534 |
| KLK10|51263|AP | 0.674713 | 1.247602 | 0.656124 | 2.372281 | 0.499858 |
| EPB41L2|77559|ES | -0.67407 | 0.667787 | 0.206416 | 2.160385 | 0.500267 |
| PACS2|29634|AA | -0.67402 | 0.194082 | 0.00165 | 22.82582 | 0.500297 |
| SH2D4A|82871|ES | -0.67397 | 0.692792 | 0.238266 | 2.014393 | 0.500331 |
| PYHIN1|8389|AT | 0.673207 | 1.292046 | 0.61278 | 2.724278 | 0.500816 |
| CHEK2|61534|ME | -0.67306 | 0.664077 | 0.201612 | 2.187362 | 0.500909 |
| DENND5A|14299|AP | 0.672875 | 1.699485 | 0.362614 | 7.96507 | 0.501027 |
| ARPP19|30688|AD | 0.67259 | 1.553271 | 0.430469 | 5.604701 | 0.501208 |
| KIAA0825|72792|AT | 0.672478 | 1.312619 | 0.594044 | 2.900408 | 0.50128 |
| PHYKPL|74860|ES | -0.67073 | 0.760025 | 0.340871 | 1.69459 | 0.502392 |
| SNAPC3|85915|RI | 0.670625 | 12.72796 | 0.007516 | 21553.63 | 0.50246 |
| STOML1|31619|AP | 0.670567 | 1.663359 | 0.375905 | 7.360274 | 0.502496 |
| MSTO1|8091|RI | 0.670204 | 1.385172 | 0.534178 | 3.591877 | 0.502727 |
| PDCD6|71424|AT | 0.669567 | 5.376032 | 0.039106 | 739.0589 | 0.503134 |
| STRADA|42961|RI | -0.66944 | 0.658189 | 0.193429 | 2.239647 | 0.503217 |
| TUBGCP2|13529|AP | -0.66931 | 0.560355 | 0.102773 | 3.055264 | 0.503299 |
| AK2|1654|ES | -0.66919 | 0.589333 | 0.12525 | 2.772948 | 0.503374 |
| PGPEP1|48424|ES | -0.66873 | 0.391716 | 0.02512 | 6.108368 | 0.503669 |
| IFT81|24410|AT | -0.6686 | 0.274486 | 0.006203 | 12.14681 | 0.503749 |
| SH2D3A|47085|RI | -0.66673 | 0.627235 | 0.159199 | 2.471266 | 0.504946 |
| SLC6A11|63374|AT | 0.66627 | 1.205269 | 0.69592 | 2.087413 | 0.505239 |
| LCP2|74487|AP | 0.66573 | 1.841066 | 0.305269 | 11.10339 | 0.505584 |
| TRAPPC2|88518|ES | 0.664796 | 1.320733 | 0.581602 | 2.999191 | 0.506181 |
| ADAM15|7896|ES | 0.664547 | 1.310448 | 0.590351 | 2.908904 | 0.50634 |
| FNBP1|87890|ES | 0.664317 | 1.310737 | 0.589935 | 2.912235 | 0.506487 |
| STK25|58385|AP | 0.66386 | 1.549215 | 0.425433 | 5.641476 | 0.50678 |
| SAMD3|77517|AT | -0.66378 | 0.532429 | 0.082791 | 3.424031 | 0.506831 |
| MACF1|1874|AP | 0.663592 | 1.386266 | 0.528315 | 3.637474 | 0.506951 |
| ARRB2|38576|ES | -0.66341 | 0.635014 | 0.166009 | 2.429034 | 0.507066 |
| LINC00999|91517|ES | -0.6634 | 0.625347 | 0.156234 | 2.503034 | 0.507076 |
| GMPR2|26913|AP | 0.662539 | 1.39786 | 0.518972 | 3.765158 | 0.507626 |
| GMPR2|26912|AP | -0.66248 | 0.7154 | 0.2656 | 1.926945 | 0.507663 |
| NDUFS1|57114|AP | 0.662104 | 1.898804 | 0.284526 | 12.67182 | 0.507904 |
| TANK|55744|ES | 0.662081 | 1.266525 | 0.629282 | 2.549073 | 0.507919 |
| PCDH7|68994|AT | 0.661078 | 1.269521 | 0.625704 | 2.575792 | 0.508562 |
| PACS2|29637|AD | 0.660922 | 4.75031 | 0.046763 | 482.5478 | 0.508662 |
| ZNF331|51722|AP | -0.66016 | 0.828444 | 0.473797 | 1.448551 | 0.509152 |
| HDDC2|77424|ES | 0.658858 | 1.744446 | 0.333256 | 9.1314 | 0.509987 |
| ZNF799|47797|AP | 0.658204 | 1.291928 | 0.602558 | 2.769988 | 0.510407 |
| SYTL2|18156|AD | -0.65795 | 0.854327 | 0.53449 | 1.365554 | 0.510571 |
| TMX2|15920|ES | -0.65746 | 0.765385 | 0.344915 | 1.698433 | 0.510887 |
| PLXNC1|23721|AP | -0.65733 | 0.827843 | 0.471294 | 1.454134 | 0.510972 |
| TMEM25|19006|AP | 0.656182 | 1.415412 | 0.501427 | 3.995382 | 0.511707 |
| NUF2|8778|AD | 0.655929 | 1.555029 | 0.415728 | 5.81658 | 0.51187 |
| OCIAD1|69253|AD | -0.65556 | 0.535464 | 0.082737 | 3.465445 | 0.512107 |
| LDHA|14607|AP | -0.65535 | 0.095373 | 8.46E-05 | 107.5691 | 0.512245 |
| SPOCK2|12071|AT | -0.65503 | 0.272937 | 0.005606 | 13.28819 | 0.51245 |
| ABTB1|66615|AP | -0.65421 | 0.702306 | 0.243629 | 2.024528 | 0.512978 |
| LAMTOR2|8170|ES | 0.653439 | 19.14978 | 0.002731 | 134265.4 | 0.513474 |
| MAP7|77915|ES | -0.6533 | 0.698947 | 0.238652 | 2.047027 | 0.51356 |
| TLE1|86675|AT | 0.653214 | 1.716265 | 0.339403 | 8.678668 | 0.513619 |
| AGAP1|58083|AP | -0.65295 | 0.554388 | 0.094366 | 3.256967 | 0.513791 |
| RPL7L1|76195|ES | -0.65266 | 0.156357 | 0.000594 | 41.13696 | 0.513978 |
| TLE1|86673|AT | -0.6521 | 0.583434 | 0.115518 | 2.946694 | 0.514339 |
| PLA2G7|76425|ES | 0.649762 | 1.377228 | 0.52445 | 3.616661 | 0.515846 |
| RBMS1|55726|AP | 0.649723 | 1.493926 | 0.445087 | 5.01433 | 0.515871 |
| EMC9|26857|AA | 0.649426 | 1.447906 | 0.473834 | 4.424401 | 0.516063 |
| DCAF6|8880|AT | 0.649367 | 8.301459 | 0.01396 | 4936.409 | 0.516101 |
| SIAH1|36340|AP | 0.649038 | 1.40454 | 0.503513 | 3.91794 | 0.516314 |
| MARK3|29445|ES | 0.648677 | 1.310095 | 0.579262 | 2.962994 | 0.516547 |
| WHSC1L1|83394|AD | 0.648614 | 1.294605 | 0.593313 | 2.824816 | 0.516588 |
| SERPINB6|75150|AP | 0.648099 | 1.555149 | 0.409091 | 5.911856 | 0.516921 |
| ERCC1|50442|AT | 0.647486 | 1.629722 | 0.371568 | 7.148078 | 0.517317 |
| ERCC1|50441|AT | -0.64747 | 0.613607 | 0.139899 | 2.691332 | 0.517326 |
| PCDHA3|73771|AT | 0.647327 | 1.459425 | 0.464596 | 4.584464 | 0.51742 |
| FNBP1|87881|AA | 0.647081 | 1.475819 | 0.453987 | 4.797584 | 0.517579 |
| TEAD4|19744|ES | 0.646472 | 3.414224 | 0.082502 | 141.2923 | 0.517974 |
| PYHIN1|8390|AT | -0.64503 | 0.782484 | 0.371357 | 1.648767 | 0.518911 |
| NRP2|57106|AT | -0.64387 | 0.688351 | 0.220851 | 2.145465 | 0.519659 |
| FDFT1|82641|AP | 0.643206 | 1.565181 | 0.399661 | 6.129676 | 0.52009 |
| PRUNE|7542|ES | 0.643112 | 2.932678 | 0.110463 | 77.85955 | 0.520152 |
| KLC4|76218|AP | -0.64182 | 0.678671 | 0.207773 | 2.216808 | 0.520987 |
| LRRFIP2|63981|AD | 0.638952 | 1.455147 | 0.460464 | 4.598519 | 0.522854 |
| GAPVD1|87565|ES | 0.638564 | 2.084649 | 0.218683 | 19.87244 | 0.523107 |
| COQ10B|56682|AP | 0.638318 | 2.789848 | 0.119514 | 65.12411 | 0.523267 |
| UQCC1|59105|ES | -0.63822 | 0.133604 | 0.000276 | 64.62542 | 0.523329 |
| FNBP1|87875|AP | 0.637808 | 1.4942 | 0.434967 | 5.13288 | 0.523599 |
| KIF1B|605|ES | -0.63772 | 0.690853 | 0.221696 | 2.152849 | 0.523653 |
| MXRA8|146|ES | 0.637698 | 2.669438 | 0.130562 | 54.57846 | 0.523671 |
| PSMG4|75176|RI | 0.637291 | 1.18119 | 0.707787 | 1.971229 | 0.523935 |
| PRMT2|60951|AT | 0.63626 | 1.698153 | 0.332312 | 8.677761 | 0.524607 |
| TCF20|62501|ES | -0.63599 | 0.767672 | 0.339872 | 1.733947 | 0.524783 |
| NSUN5|79935|RI | 0.635924 | 1.618885 | 0.366772 | 7.14555 | 0.524826 |
| INHBA|79310|AP | 0.634931 | 1.259186 | 0.618191 | 2.564821 | 0.525474 |
| IQCH|31314|AT | -0.6347 | 0.777406 | 0.357244 | 1.69173 | 0.525627 |
| FPGS|87668|AP | 0.634201 | 1.854749 | 0.274893 | 12.51428 | 0.52595 |
| PFDN5|21993|AA | 0.634061 | 1.461434 | 0.452299 | 4.722071 | 0.526041 |
| TMUB2|41790|ES | -0.63375 | 0.82405 | 0.452928 | 1.499262 | 0.526241 |
| EFNA3|7937|AP | -0.63254 | 0.804364 | 0.409726 | 1.579108 | 0.527032 |
| EFNA3|7936|AP | 0.632435 | 1.24317 | 0.633248 | 2.440547 | 0.527103 |
| SH3YL1|52495|AP | -0.63227 | 0.716868 | 0.255456 | 2.011697 | 0.527212 |
| HAUS4|26679|AD | 0.632114 | 1.432975 | 0.469676 | 4.371988 | 0.527312 |
| PQBP1|89029|AD | 0.631895 | 1.24144 | 0.634738 | 2.428047 | 0.527455 |
| IL32|33385|RI | 0.631794 | 1.591329 | 0.376579 | 6.724553 | 0.527521 |
| SLC9B2|70176|ES | -0.63076 | 0.76294 | 0.329119 | 1.768589 | 0.528195 |
| TRPC4AP|59058|ES | 0.630459 | 4.336014 | 0.045343 | 414.6404 | 0.528394 |
| GNB2L1|1476964|ES | -0.63004 | 0.573524 | 0.101728 | 3.233421 | 0.528668 |
| PSMG4|75174|RI | 0.6291 | 1.213239 | 0.664372 | 2.21555 | 0.529284 |
| PFKFB4|64703|AP | 0.627164 | 1.737427 | 0.30915 | 9.76436 | 0.530552 |
| TRO|89255|AD | 0.625715 | 1.279429 | 0.591293 | 2.768405 | 0.531502 |
| FAM83A|85048|ES | -0.62516 | 0.56167 | 0.092059 | 3.426856 | 0.531868 |
| DCAF6|91281|ES | -0.62486 | 0.636425 | 0.154232 | 2.626161 | 0.532062 |
| SYNE1|78184|ES | -0.62459 | 0.806346 | 0.41038 | 1.584372 | 0.53224 |
| CD97|47967|ES | -0.62457 | 0.713514 | 0.247381 | 2.057967 | 0.532252 |
| PPP1R35|97626|ES | 0.624447 | 2.249098 | 0.176666 | 28.63278 | 0.532334 |
| LGMN|29004|ES | 0.624243 | 3.392976 | 0.073231 | 157.2057 | 0.532468 |
| RGS10|13261|AP | 0.624077 | 5.44094 | 0.026621 | 1112.029 | 0.532577 |
| C1orf159|16|RI | -0.622 | 0.730903 | 0.272189 | 1.962675 | 0.533943 |
| WDR83|47817|AP | -0.62195 | 0.38428 | 0.018869 | 7.826286 | 0.533975 |
| OAS3|24605|AT | -0.62161 | 0.487717 | 0.050693 | 4.692334 | 0.534198 |
| DCAF8|8452|AD | -0.62094 | 0.669167 | 0.188298 | 2.378062 | 0.534638 |
| IL18BP|17496|RI | 0.62021 | 1.152611 | 0.735793 | 1.805551 | 0.53512 |
| TMEM205|47663|ES | 0.620123 | 11.85238 | 0.004786 | 29354.99 | 0.535177 |
| TRAPPC2L|38051|AA | -0.62011 | 0.025723 | 2.43E-07 | 2721.376 | 0.535187 |
| GRB2|43439|AP | 0.619971 | 2.103427 | 0.200462 | 22.07108 | 0.535277 |
| TIMP1|98326|AD | 0.619282 | 1.341548 | 0.529354 | 3.399905 | 0.53573 |
| BRD8|73508|ES | 0.618144 | 1.974856 | 0.228284 | 17.08427 | 0.53648 |
| RPS25|92842|ES | 0.617603 | 1.340589 | 0.528838 | 3.398351 | 0.536837 |
| MEGF6|312|AP | -0.61715 | 0.82943 | 0.457971 | 1.50218 | 0.537137 |
| GSTK1|82080|AD | 0.616871 | 1.383149 | 0.493504 | 3.876567 | 0.53732 |
| RNF175|70879|AT | -0.61674 | 0.224856 | 0.00196 | 25.79361 | 0.537406 |
| KLC4|76221|AP | 0.616606 | 1.451166 | 0.444301 | 4.73976 | 0.537495 |
| DCLRE1C|10848|ES | -0.6159 | 0.783265 | 0.359994 | 1.704202 | 0.537961 |
| RBM39|95934|ES | 0.615615 | 1.488758 | 0.419368 | 5.285095 | 0.538149 |
| ARHGDIB|20564|AP | 0.614793 | 1.895569 | 0.246777 | 14.56044 | 0.538691 |
| DMKN|49191|ES | 0.613838 | 1.574826 | 0.369381 | 6.71414 | 0.539323 |
| IL15|70674|ES | 0.613518 | 1.250345 | 0.612428 | 2.552733 | 0.539534 |
| ABI1|11038|ES | -0.61279 | 0.823164 | 0.441747 | 1.533907 | 0.540018 |
| CALB2|37429|ES | 0.612129 | 3.568781 | 0.060732 | 209.7114 | 0.540452 |
| UBALD1|33770|AA | 0.611939 | 1.379148 | 0.492555 | 3.861596 | 0.540578 |
| CCDC92|25123|AA | -0.61171 | 0.808454 | 0.409049 | 1.597847 | 0.540731 |
| TPCN2|101162|ES | 0.61154 | 1.275646 | 0.584613 | 2.783502 | 0.540842 |
| KATNAL2|45426|AP | -0.61083 | 0.77231 | 0.337092 | 1.769434 | 0.541313 |
| KCNMA1|12291|AA | -0.61058 | 0.677226 | 0.193816 | 2.366347 | 0.541477 |
| BRD8|73509|ES | -0.60959 | 0.575923 | 0.097697 | 3.395063 | 0.542135 |
| SS18|44912|ES | 0.609555 | 1.304487 | 0.554951 | 3.066374 | 0.542157 |
| LYPLA2|1070|AP | 0.609133 | 1.453544 | 0.436309 | 4.842416 | 0.542437 |
| ITGB7|21977|ES | -0.60847 | 0.526326 | 0.066587 | 4.160284 | 0.542873 |
| APOLD1|20514|AP | 0.607801 | 1.272369 | 0.585152 | 2.766669 | 0.54332 |
| SZT2|2177|AT | 0.607715 | 2.778348 | 0.102923 | 74.99958 | 0.543376 |
| RGS19|60191|AP | 0.607168 | 1.465988 | 0.426436 | 5.039721 | 0.54374 |
| RGS19|60190|AP | -0.60713 | 0.682148 | 0.198427 | 2.345067 | 0.543761 |
| CAPG|54272|AP | 0.607084 | 1.302644 | 0.554769 | 3.058721 | 0.543795 |
| CAPG|54271|AP | -0.60706 | 0.767677 | 0.326938 | 1.802569 | 0.54381 |
| SIGIRR|13651|AP | 0.606864 | 1.300231 | 0.556895 | 3.035766 | 0.543941 |
| MUTYH|2651|ES | 0.60685 | 1.377457 | 0.489658 | 3.874924 | 0.54395 |
| PAPD4|72637|RI | 0.606729 | 2.620754 | 0.116614 | 58.89796 | 0.54403 |
| TAZ|90591|ES | 0.606699 | 1.826659 | 0.260833 | 12.7924 | 0.544051 |
| ANKRD6|77005|AD | 0.606606 | 1.725388 | 0.29614 | 10.05256 | 0.544113 |
| RAD51D|40248|ES | -0.60626 | 0.523125 | 0.0644 | 4.249374 | 0.544344 |
| DCAF6|8888|ES | -0.60616 | 0.056708 | 5.29E-06 | 607.6193 | 0.544409 |
| STK25|58389|ES | 0.605488 | 1.803907 | 0.267208 | 12.17809 | 0.544855 |
| APH1B|31024|ES | -0.60532 | 0.396387 | 0.01981 | 7.931663 | 0.544965 |
| POLR3H|62431|ES | -0.60528 | 0.658069 | 0.16975 | 2.551137 | 0.544996 |
| YWHAZ|84724|AP | 0.60453 | 1.507844 | 0.3982 | 5.709669 | 0.545492 |
| ZDHHC4|78749|ES | -0.60434 | 0.810395 | 0.409815 | 1.602526 | 0.545615 |
| TCF4|45609|AP | 0.604166 | 1.304882 | 0.550362 | 3.093813 | 0.545733 |
| ADPRHL1|26374|AP | -0.60405 | 0.854802 | 0.513794 | 1.422138 | 0.545811 |
| PARP3|65119|ES | -0.60376 | 0.786131 | 0.359953 | 1.716899 | 0.546002 |
| TCEAL8|89723|ES | -0.60348 | 0.506374 | 0.055548 | 4.616097 | 0.546187 |
| PDDC1|13750|ES | 0.60331 | 1.205661 | 0.656675 | 2.213604 | 0.546303 |
| NUTM2D|12450|AT | 0.603149 | 1.4409 | 0.439688 | 4.721974 | 0.54641 |
| GTF2H2C|72396|ES | -0.60307 | 0.730391 | 0.263095 | 2.027676 | 0.546463 |
| NUTM2D|12451|AT | -0.60305 | 0.694052 | 0.211789 | 2.27447 | 0.546474 |
| GNPDA2|69150|AT | 0.602574 | 2.35183 | 0.145664 | 37.97169 | 0.546792 |
| PAPD4|72634|ES | 0.602189 | 8.893808 | 0.007245 | 10917.33 | 0.547049 |
| ARPC4|63188|AD | -0.60206 | 0.449237 | 0.0332 | 6.078718 | 0.547132 |
| SIGIRR|13650|AP | -0.60184 | 0.77076 | 0.330111 | 1.79961 | 0.547278 |
| SRGAP3|96261|ES | -0.60089 | 0.580294 | 0.098337 | 3.42436 | 0.547916 |
| ARRDC1|88335|RI | -0.60086 | 0.673072 | 0.185017 | 2.448559 | 0.547931 |
| BFAR|34097|ES | -0.60071 | 0.046004 | 1.99E-06 | 1061.036 | 0.548032 |
| PHB2|20051|ES | -0.60014 | 0.317749 | 0.007516 | 13.43358 | 0.548411 |
| ISG20|32390|AP | 0.599667 | 5.752213 | 0.018896 | 1751.039 | 0.548728 |
| ARPP19|30690|ES | 0.599491 | 1.599131 | 0.344596 | 7.420933 | 0.548845 |
| NUMA1|17518|ES | -0.59895 | 0.824844 | 0.439249 | 1.548934 | 0.549209 |
| HSD11B1L|46877|ES | -0.59891 | 0.797198 | 0.379698 | 1.673764 | 0.54923 |
| CAST|72838|AP | -0.59858 | 0.76723 | 0.322204 | 1.826918 | 0.549451 |
| FAM175A|69802|ES | -0.59832 | 0.791875 | 0.368705 | 1.700728 | 0.549626 |
| KPNA5|77336|AT | 0.59831 | 1.410627 | 0.457048 | 4.35374 | 0.549633 |
| KPNA5|77335|AT | -0.59827 | 0.70892 | 0.229692 | 2.188005 | 0.549659 |
| MAP3K4|78357|ES | -0.59798 | 0.804013 | 0.393321 | 1.643534 | 0.549856 |
| BCCIP|13431|AT | 0.597375 | 1.444261 | 0.432369 | 4.824332 | 0.550257 |
| RNPS1|33261|ES | -0.59681 | 0.59072 | 0.104852 | 3.32802 | 0.550637 |
| ZNF707|85485|ES | 0.596792 | 1.232062 | 0.620841 | 2.445035 | 0.550646 |
| CDH11|36699|ES | 0.596452 | 4.952611 | 0.025798 | 950.7955 | 0.550874 |
| PDHB|65456|ES | 0.595905 | 12.04653 | 0.003356 | 43238.88 | 0.551239 |
| RUNX1|60499|AP | 0.595611 | 1.918442 | 0.224831 | 16.36976 | 0.551435 |
| SUB1|71655|AP | -0.59466 | 0.085194 | 2.54E-05 | 285.5829 | 0.552073 |
| DCLK2|70807|ES | -0.59457 | 0.806821 | 0.397623 | 1.637126 | 0.552132 |
| IDNK|86684|AP | 0.594424 | 1.29036 | 0.556762 | 2.990562 | 0.552229 |
| IL11RA|86206|AP | -0.59436 | 0.851609 | 0.501421 | 1.446366 | 0.552268 |
| UBE2A|89956|AP | -0.59414 | 0.295595 | 0.005304 | 16.47348 | 0.552421 |
| RABL2A|55062|ES | -0.59304 | 0.778059 | 0.339483 | 1.783231 | 0.553152 |
| FLAD1|7868|ES | -0.59094 | 0.446991 | 0.030936 | 6.458614 | 0.554557 |
| MTCH1|76000|AD | 0.590746 | 1.535001 | 0.370375 | 6.361741 | 0.55469 |
| WIBG|22287|AP | 0.590506 | 1.759474 | 0.269728 | 11.47732 | 0.554852 |
| ILF3|47578|ES | 0.590221 | 5.636208 | 0.018078 | 1757.168 | 0.555043 |
| ADPRHL1|26375|AP | 0.590163 | 1.165639 | 0.70065 | 1.939218 | 0.555081 |
| FBN1|30499|AT | -0.58954 | 0.048336 | 2.04E-06 | 1144.167 | 0.555498 |
| MAGED4B|89151|AA | -0.58932 | 0.625054 | 0.130971 | 2.983033 | 0.555647 |
| CPSF4|80633|AA | -0.58891 | 0.615354 | 0.122268 | 3.09697 | 0.555918 |
| SLC52A2|85574|AD | 0.586691 | 12.80175 | 0.00256 | 64022.37 | 0.557411 |
| AQP1|79158|AP | 0.586041 | 1.237484 | 0.606805 | 2.523657 | 0.557848 |
| SP140L|57888|AT | 0.585457 | 1.630869 | 0.317171 | 8.385819 | 0.558241 |
| PLCD1|64009|AP | 0.584647 | 1.199412 | 0.651982 | 2.206488 | 0.558785 |
| SYTL2|18148|ES | -0.58425 | 0.847351 | 0.486114 | 1.477026 | 0.559054 |
| WWP2|37313|AP | -0.58348 | 0.787656 | 0.353284 | 1.7561 | 0.559568 |
| HAUS4|26677|ES | -0.58348 | 0.27333 | 0.003503 | 21.32653 | 0.559572 |
| AP4M1|80884|AP | 0.583175 | 1.494045 | 0.387573 | 5.759358 | 0.559775 |
| PLCD1|64008|AP | -0.58292 | 0.83419 | 0.453452 | 1.534611 | 0.559948 |
| LRRC29|36981|AP | -0.58223 | 0.818168 | 0.416337 | 1.607828 | 0.560409 |
| DMKN|49144|ES | 0.580895 | 1.606701 | 0.324415 | 7.957363 | 0.561311 |
| DENND2D|4142|AP | 0.579939 | 1.726404 | 0.272706 | 10.92924 | 0.561956 |
| ZDHHC13|14686|ES | 0.578656 | 1.963564 | 0.199744 | 19.30263 | 0.562821 |
| FN1|57393|AA | 0.577918 | 1.644891 | 0.304176 | 8.895069 | 0.563319 |
| RANBP10|37109|ES | 0.577814 | 2.432491 | 0.119276 | 49.60786 | 0.56339 |
| ZNF101|48677|RI | -0.57673 | 0.606207 | 0.110631 | 3.321723 | 0.564121 |
| EMP3|50726|ES | -0.57657 | 0.819818 | 0.417264 | 1.610736 | 0.564233 |
| PWWP2A|74408|AT | -0.57651 | 0.589391 | 0.09769 | 3.555971 | 0.564268 |
| PWWP2A|74409|AT | 0.576459 | 1.696583 | 0.281202 | 10.23603 | 0.564305 |
| IGFLR1|49262|ES | -0.5764 | 0.831765 | 0.444603 | 1.556067 | 0.564346 |
| DMKN|49189|ES | 0.575816 | 1.287908 | 0.544326 | 3.047271 | 0.564739 |
| AP1G1|37485|ES | 0.575097 | 1.354493 | 0.481586 | 3.809601 | 0.565226 |
| LAMTOR1|17556|AT | 0.574988 | 14.09693 | 0.001706 | 116452.3 | 0.565299 |
| BFAR|34094|ES | -0.57456 | 0.033246 | 3.01E-07 | 3668.027 | 0.565589 |
| PDZRN3|65627|AP | -0.57454 | 0.880144 | 0.569385 | 1.360507 | 0.565601 |
| GNPDA1|73856|AP | -0.57373 | 0.694807 | 0.200284 | 2.410364 | 0.56615 |
| CFL1|16922|AP | 0.57309 | 1.266498 | 0.564544 | 2.84126 | 0.566584 |
| SGSM2|38393|AA | 0.571892 | 13.88785 | 0.001685 | 114452.6 | 0.567395 |
| RDH13|52001|AT | 0.571711 | 1.499829 | 0.373704 | 6.019434 | 0.567518 |
| RDH13|52000|AT | -0.57169 | 0.666752 | 0.166131 | 2.675958 | 0.567532 |
| ABHD12|58871|AT | -0.5707 | 0.592983 | 0.098536 | 3.568526 | 0.568204 |
| ABCB5|78910|AT | -0.57068 | 0.828348 | 0.433831 | 1.581633 | 0.568217 |
| PLAC8|69770|AP | -0.57067 | 0.859437 | 0.510826 | 1.445958 | 0.568224 |
| CRB2|87507|AP | 0.570466 | 1.177543 | 0.671615 | 2.064587 | 0.568362 |
| MRPL43|12857|ES | -0.56987 | 0.793271 | 0.357685 | 1.75931 | 0.568766 |
| ITSN1|60470|ES | -0.56942 | 0.353509 | 0.009862 | 12.67117 | 0.56907 |
| SDHAF2|16234|ES | 0.568526 | 2.247645 | 0.137773 | 36.66822 | 0.569678 |
| TVP23B|39649|AP | -0.56832 | 0.747771 | 0.274432 | 2.03752 | 0.569817 |
| SLC43A2|38344|AP | 0.56799 | 1.484133 | 0.379989 | 5.796614 | 0.570042 |
| MBD2|45575|AT | -0.56784 | 0.201386 | 0.000798 | 50.84548 | 0.570144 |
| IDNK|86685|AP | -0.56728 | 0.784581 | 0.339319 | 1.81413 | 0.570526 |
| SKIL|67612|AP | -0.56472 | 0.827614 | 0.429175 | 1.595959 | 0.572265 |
| FIS1|81055|AD | 0.564689 | 1.386668 | 0.445866 | 4.312618 | 0.572285 |
| ASPSCR1|44254|AT | 0.564688 | 2.670034 | 0.088334 | 80.70561 | 0.572286 |
| RNASEH2B|25926|AT | -0.56406 | 0.672388 | 0.169296 | 2.670496 | 0.57271 |
| RNASEH2B|25927|AT | 0.564065 | 1.487237 | 0.374462 | 5.9068 | 0.57271 |
| KAT6B|12262|AP | -0.56393 | 0.803012 | 0.374608 | 1.721341 | 0.572804 |
| RPL32|63467|RI | -0.56332 | 0.82186 | 0.415292 | 1.626456 | 0.573216 |
| TXLNA|1559|AP | -0.56199 | 0.647922 | 0.142628 | 2.94335 | 0.574121 |
| TXLNA|1558|AP | 0.561887 | 1.543279 | 0.339716 | 7.010885 | 0.574193 |
| ABR|38285|AP | 0.561581 | 1.244853 | 0.579626 | 2.673553 | 0.574402 |
| DYRK1B|49846|AA | -0.56097 | 0.678645 | 0.175154 | 2.629449 | 0.574818 |
| TP53I3|52810|ES | -0.56066 | 0.526028 | 0.055681 | 4.969464 | 0.575029 |
| R3HDM4|46350|ES | 0.560451 | 1.536393 | 0.342202 | 6.897987 | 0.575172 |
| MLST8|33220|ES | -0.56036 | 0.232593 | 0.001416 | 38.19815 | 0.575234 |
| PSMA4|32110|ES | 0.5603 | 1.235317 | 0.589837 | 2.587167 | 0.575274 |
| GNPDA1|73857|AP | 0.560284 | 1.426744 | 0.411547 | 4.946212 | 0.575285 |
| TPI1|19990|AP | 0.559862 | 28.77788 | 0.000224 | 3689194 | 0.575574 |
| ZNF213|33457|AA | -0.55986 | 0.679842 | 0.176075 | 2.624928 | 0.575576 |
| PIK3IP1|61842|ES | -0.5597 | 0.535834 | 0.060277 | 4.763338 | 0.575683 |
| C15orf40|32246|AT | 0.559685 | 1.960805 | 0.185505 | 20.72587 | 0.575694 |
| CGGBP1|65666|AP | 0.559097 | 2.092433 | 0.157246 | 27.84353 | 0.576096 |
| ID2|52599|AT | 0.558563 | 4.024989 | 0.030387 | 533.1467 | 0.57646 |
| CCDC69|74158|AT | -0.55781 | 0.285002 | 0.003462 | 23.46007 | 0.576973 |
| CHRAC1|85283|ES | -0.55664 | 0.353307 | 0.009061 | 13.77654 | 0.577774 |
| NCALD|84757|ES | 0.555928 | 1.112121 | 0.76461 | 1.617575 | 0.57826 |
| PPP2R5A|9728|ES | -0.55589 | 0.400246 | 0.015856 | 10.1032 | 0.578289 |
| GFER|33179|AP | -0.55583 | 0.305289 | 0.004653 | 20.03157 | 0.578326 |
| NABP1|56613|AA | -0.55454 | 0.825108 | 0.418243 | 1.627769 | 0.579207 |
| PAX8|533932|ES | 0.553763 | 1.482719 | 0.367807 | 5.977197 | 0.579741 |
| DTNB|52860|AP | -0.5533 | 0.465626 | 0.031055 | 6.981495 | 0.580056 |
| NISCH|65221|AT | -0.55328 | 0.543189 | 0.062522 | 4.719186 | 0.58007 |
| GPR34|88871|AA | -0.55308 | 0.479319 | 0.035388 | 6.492284 | 0.580206 |
| TEAD2|95291|ES | 0.552538 | 1.487993 | 0.363371 | 6.093277 | 0.58058 |
| DMPK|50526|AA | 0.550366 | 1.22147 | 0.599068 | 2.490514 | 0.582068 |
| CUZD1|13374|AP | -0.54978 | 0.755076 | 0.277351 | 2.055664 | 0.582469 |
| FDPS|8075|AD | -0.54733 | 0.608529 | 0.102755 | 3.603787 | 0.584152 |
| VSNL1|52727|AP | -0.5469 | 0.660399 | 0.149292 | 2.921311 | 0.584447 |
| PLS1|67119|AP | 0.545527 | 1.491712 | 0.354545 | 6.276221 | 0.585391 |
| SUMF2|79798|ES | -0.54535 | 0.738197 | 0.247964 | 2.197634 | 0.585513 |
| NTAN1|34131|ES | -0.5447 | 0.564474 | 0.072111 | 4.418632 | 0.585959 |
| ELP2|45226|ES | 0.544533 | 1.166539 | 0.670047 | 2.030924 | 0.586075 |
| OLR1|20340|ES | 0.54451 | 2.226496 | 0.124841 | 39.7088 | 0.586091 |
| CSF1R|74059|ES | 0.544362 | 47.96743 | 4.25E-05 | 54095330 | 0.586192 |
| SYK|86821|ES | -0.54416 | 0.810486 | 0.380247 | 1.727529 | 0.586328 |
| C1orf86|246|AT | -0.54392 | 0.581949 | 0.08273 | 4.093621 | 0.5865 |
| CRELD1|63290|AD | -0.54358 | 0.492981 | 0.038485 | 6.314984 | 0.586728 |
| FCGR1B|4403|ES | 0.542988 | 1.5397 | 0.324242 | 7.311439 | 0.587138 |
| PKIG|59481|ES | 0.542919 | 1.455795 | 0.375233 | 5.648064 | 0.587185 |
| LMO7|26067|ES | -0.54174 | 0.866693 | 0.516497 | 1.454331 | 0.587999 |
| C16orf13|32924|ES | -0.54169 | 0.685118 | 0.174392 | 2.691549 | 0.58803 |
| TPGS2|45263|AT | 0.54168 | 1.573736 | 0.305051 | 8.118794 | 0.588039 |
| CDK2AP1|25064|AP | 0.541493 | 3.262043 | 0.045174 | 235.5566 | 0.588168 |
| MAPK9|75012|ES | 0.540479 | 1.338235 | 0.465245 | 3.849311 | 0.588867 |
| SRCAP|36172|ES | 0.540197 | 2.338568 | 0.107228 | 51.00232 | 0.589061 |
| ENTPD5|28354|AT | 0.538166 | 1.582641 | 0.297334 | 8.424029 | 0.590462 |
| AFMID|99319|ES | 0.537269 | 1.232275 | 0.575182 | 2.64004 | 0.591082 |
| RBMS1|55724|AP | -0.53699 | 0.718393 | 0.21483 | 2.402316 | 0.591277 |
| C6orf1|75778|AD | 0.536677 | 1.413952 | 0.399063 | 5.009884 | 0.591491 |
| NFIA|3224|AP | 0.536508 | 1.403101 | 0.407142 | 4.835398 | 0.591608 |
| C1QC|1016|ES | -0.5363 | 0.676573 | 0.162249 | 2.82129 | 0.591752 |
| CHTF8|37273|ES | 0.535623 | 1.396667 | 0.411306 | 4.742647 | 0.592219 |
| NAAA|69561|AT | 0.534045 | 1.397057 | 0.409518 | 4.766018 | 0.59331 |
| AFTPH|95552|ES | -0.53281 | 0.635289 | 0.119726 | 3.37097 | 0.594168 |
| TNPO2|47848|AP | 0.531979 | 1.335034 | 0.460407 | 3.871172 | 0.59474 |
| FAM177A1|27187|RI | -0.5314 | 0.799204 | 0.349649 | 1.826767 | 0.59514 |
| PPIH|2096|AP | 0.531184 | 4.592087 | 0.01657 | 1272.607 | 0.595291 |
| ENTPD5|28353|AT | -0.53117 | 0.636022 | 0.119756 | 3.377901 | 0.595304 |
| SMARCC2|22392|ES | -0.52944 | 0.835395 | 0.429275 | 1.625727 | 0.596503 |
| LUC7L|32841|RI | 0.529259 | 1.348823 | 0.445351 | 4.085139 | 0.596626 |
| C5orf22|71633|ES | -0.52857 | 0.723932 | 0.218501 | 2.398516 | 0.597102 |
| FARS2|75245|AP | 0.528353 | 1.425485 | 0.382672 | 5.310052 | 0.597254 |
| FARS2|75246|AP | -0.52833 | 0.701525 | 0.188325 | 2.613237 | 0.597268 |
| SKIL|67613|AP | 0.527802 | 1.193656 | 0.618575 | 2.303384 | 0.597637 |
| UBR4|885|ES | 0.526806 | 1.620306 | 0.269028 | 9.758786 | 0.598328 |
| REXO2|18838|ES | 0.526643 | 29.9917 | 9.55E-05 | 9415286 | 0.598441 |
| MEGF6|315|ES | 0.525985 | 1.22398 | 0.576373 | 2.599231 | 0.598899 |
| ST7|81569|ES | -0.5259 | 0.152462 | 0.000138 | 168.8125 | 0.598957 |
| APP|60283|ES | 0.525341 | 1.353553 | 0.437484 | 4.187826 | 0.599346 |
| FAH|32180|RI | -0.52534 | 0.854774 | 0.475993 | 1.534979 | 0.599346 |
| ADCY1|79595|AT | 0.525054 | 1.143272 | 0.693561 | 1.88458 | 0.599546 |
| NOC4L|25255|AP | -0.52495 | 0.39529 | 0.012358 | 12.64366 | 0.599617 |
| MKL1|62348|AP | 0.524823 | 1.510968 | 0.323461 | 7.05812 | 0.599706 |
| WNT2B|4199|AP | -0.5247 | 0.895693 | 0.593547 | 1.351647 | 0.59979 |
| MAPK1|61256|AT | 0.524374 | 1.436246 | 0.371152 | 5.55784 | 0.600018 |
| LTBP1|53179|AP | -0.52287 | 0.85741 | 0.481668 | 1.526264 | 0.601065 |
| KLHL24|67806|ES | -0.52285 | 0.851522 | 0.466149 | 1.555489 | 0.601082 |
| WWP2|37311|AP | 0.522786 | 1.235431 | 0.559221 | 2.729317 | 0.601123 |
| CD46|9655|ES | 0.522078 | 2.178461 | 0.117134 | 40.51511 | 0.601616 |
| LINGO1|31993|AP | -0.52103 | 0.704289 | 0.188378 | 2.633124 | 0.602348 |
| COQ10A|22414|AP | -0.52028 | 0.829114 | 0.409282 | 1.679597 | 0.602868 |
| NMRAL1|33738|RI | -0.51975 | 0.772558 | 0.291958 | 2.044288 | 0.603239 |
| HEXA|31544|ES | -0.51957 | 0.101153 | 1.78E-05 | 573.4307 | 0.603364 |
| LBX2|54098|AP | 0.519434 | 1.213741 | 0.584381 | 2.520905 | 0.603458 |
| C22orf29|61086|AD | -0.51928 | 0.778578 | 0.302714 | 2.002496 | 0.603566 |
| PODNL1|47949|AP | 0.518915 | 1.135456 | 0.702731 | 1.834643 | 0.60382 |
| ERO1LB|10370|AT | -0.51858 | 0.822629 | 0.393298 | 1.720627 | 0.604051 |
| ERO1LB|10369|AT | 0.518555 | 1.215602 | 0.581177 | 2.542578 | 0.604071 |
| GPR35|58298|AP | -0.51845 | 0.815465 | 0.377119 | 1.763322 | 0.604144 |
| ALKBH6|95157|ES | 0.518407 | 1.29355 | 0.488832 | 3.423001 | 0.604174 |
| SARNP|22251|AT | -0.51832 | 0.714703 | 0.200689 | 2.545234 | 0.604233 |
| RAB3IP|23345|AP | 0.517789 | 1.316441 | 0.464983 | 3.727058 | 0.604605 |
| YBX3|20481|ES | -0.51777 | 0.650941 | 0.12815 | 3.306459 | 0.60462 |
| TPM2|86276|AT | 0.516941 | 1.617026 | 0.261441 | 10.00138 | 0.605197 |
| TPM1|30985|AT | 0.516405 | 2.528639 | 0.074777 | 85.50748 | 0.605572 |
| NINJ2|19605|AP | -0.51571 | 0.749508 | 0.250529 | 2.242299 | 0.606058 |
| WDR86|82376|ES | -0.51548 | 0.613777 | 0.095935 | 3.926852 | 0.60622 |
| TSPO|62572|ES | 0.514974 | 3.048182 | 0.043834 | 211.9698 | 0.606571 |
| LTBP1|53180|AP | 0.514691 | 1.163645 | 0.653391 | 2.07237 | 0.606769 |
| DCAF8|8447|ES | 0.51433 | 1.301585 | 0.476706 | 3.553818 | 0.607021 |
| ADCY1|79596|AT | -0.51419 | 0.877125 | 0.532143 | 1.445755 | 0.607117 |
| PARD6G|46292|AT | 0.51417 | 1.34082 | 0.438376 | 4.101041 | 0.607133 |
| MEGF6|311|AP | 0.513726 | 1.168483 | 0.645104 | 2.116484 | 0.607444 |
| C21orf33|60806|ES | 0.513358 | 2.823669 | 0.053658 | 148.5901 | 0.607701 |
| ACAA1|64017|AD | -0.51296 | 0.837617 | 0.425609 | 1.648464 | 0.607978 |
| PPP1R13L|50435|AP | -0.51267 | 0.803942 | 0.349056 | 1.851633 | 0.608182 |
| CUZD1|13376|AP | 0.51233 | 1.298558 | 0.477975 | 3.52791 | 0.60842 |
| KCNAB2|360|AP | -0.51214 | 0.857311 | 0.475619 | 1.545317 | 0.608553 |
| TMEM9|9350|AP | 0.511792 | 2.399161 | 0.084058 | 68.47598 | 0.608796 |
| PPP4R1|44608|ES | 0.511742 | 1.42957 | 0.363724 | 5.618741 | 0.608831 |
| CCDC120|89066|AD | -0.51092 | 0.751435 | 0.251067 | 2.249022 | 0.60941 |
| HYAL1|64993|AP | 0.510104 | 1.191685 | 0.607474 | 2.337732 | 0.609978 |
| NLRP1|38720|AT | -0.50902 | 0.804323 | 0.347773 | 1.860226 | 0.610737 |
| AFMID|43850|ES | -0.50899 | 0.339154 | 0.005274 | 21.81157 | 0.610758 |
| ZSCAN30|45155|AT | -0.50861 | 0.547408 | 0.053687 | 5.58151 | 0.611027 |
| TMEM107|39130|ES | -0.50837 | 0.840453 | 0.430014 | 1.642645 | 0.611194 |
| SETD6|36663|AA | -0.5076 | 0.704982 | 0.182792 | 2.718936 | 0.611734 |
| FGFR1OP|78436|ES | -0.50639 | 0.719471 | 0.201181 | 2.572992 | 0.612583 |
| BBS9|79222|ES | 0.506346 | 1.852519 | 0.170336 | 20.14738 | 0.612614 |
| OSGEP|26441|AP | -0.50606 | 0.765497 | 0.271931 | 2.154904 | 0.612813 |
| OSGEP|26440|AP | 0.506027 | 1.306318 | 0.464048 | 3.677349 | 0.612838 |
| MUTYH|2653|ES | -0.50595 | 0.781254 | 0.300257 | 2.032788 | 0.612888 |
| ESR2|27867|AT | 0.505919 | 1.206976 | 0.582362 | 2.501521 | 0.612914 |
| BID|61008|ES | 0.505667 | 1.811523 | 0.181079 | 18.1226 | 0.61309 |
| TMEM138|16186|AT | -0.50546 | 0.487742 | 0.030138 | 7.893391 | 0.613237 |
| ZNF540|49541|AP | -0.50512 | 0.865874 | 0.495184 | 1.51406 | 0.613476 |
| CMC2|37706|ES | 0.505022 | 1.655075 | 0.234206 | 11.69601 | 0.613543 |
| GBGT1|88018|AT | 0.504651 | 2.551819 | 0.067101 | 97.04491 | 0.613804 |
| HYAL1|64992|AP | -0.50425 | 0.84089 | 0.428753 | 1.649192 | 0.614088 |
| C19orf60|48491|ES | 0.503892 | 1.438416 | 0.349759 | 5.915618 | 0.614337 |
| GCNT2|75296|AP | 0.503789 | 1.170965 | 0.633691 | 2.163763 | 0.61441 |
| HAGHL|32967|AP | -0.50294 | 0.748691 | 0.242359 | 2.312841 | 0.615006 |
| COL16A1|1493|ES | -0.50291 | 0.80485 | 0.345351 | 1.875727 | 0.615031 |
| SLC16A3|44300|AP | 0.502561 | 1.24302 | 0.532131 | 2.903605 | 0.615273 |
| ATXN2L|35846|ES | 0.502314 | 1.232996 | 0.544554 | 2.791788 | 0.615447 |
| LMO4|3694|AP | -0.50226 | 0.552974 | 0.054785 | 5.581442 | 0.615485 |
| MBD6|22634|RI | 0.501158 | 1.620465 | 0.245338 | 10.70321 | 0.61626 |
| AQP1|79157|AP | -0.50112 | 0.822615 | 0.383278 | 1.765548 | 0.616289 |
| AFMID|43826|ES | 0.501015 | 1.182507 | 0.613758 | 2.278296 | 0.61636 |
| WISP3|77282|ES | -0.50049 | 0.85835 | 0.471943 | 1.561131 | 0.616728 |
| RHOT2|32937|AA | -0.50048 | 0.38641 | 0.00933 | 16.00422 | 0.616737 |
| ZNF33A|11311|ES | -0.50045 | 0.271152 | 0.001635 | 44.97594 | 0.616758 |
| ZNF302|48982|AA | -0.49918 | 0.853731 | 0.458841 | 1.588475 | 0.617654 |
| SMG6|38383|AP | -0.49907 | 0.788654 | 0.310409 | 2.003727 | 0.617731 |
| RAI2|88595|AA | -0.49859 | 0.714312 | 0.190338 | 2.680715 | 0.618065 |
| DLG3|89380|AP | 0.498327 | 1.340078 | 0.423756 | 4.237831 | 0.618254 |
| MOK|29362|AP | 0.498249 | 1.128786 | 0.700895 | 1.8179 | 0.618308 |
| TNFRSF25|426|AA | 0.498045 | 1.358263 | 0.407053 | 4.532283 | 0.618452 |
| SLC25A27|100949|AA | 0.497806 | 1.303583 | 0.459001 | 3.702232 | 0.618621 |
| COL1A1|257048|ES | -0.49761 | 0.737498 | 0.222281 | 2.446915 | 0.618759 |
| ZNF783|82186|AD | 0.497326 | 1.645386 | 0.231183 | 11.71062 | 0.618959 |
| NAB1|56585|ES | -0.49723 | 0.694449 | 0.164976 | 2.923221 | 0.61903 |
| ZNF154|52329|RI | 0.496897 | 1.290528 | 0.471906 | 3.529221 | 0.619262 |
| PGBD2|10573|AA | 0.496778 | 1.321714 | 0.439751 | 3.972534 | 0.619346 |
| CYB5R3|62541|AP | 0.496625 | 4.896942 | 0.00927 | 2586.786 | 0.619454 |
| SLC4A11|58580|AP | -0.49647 | 0.816935 | 0.367723 | 1.81491 | 0.619565 |
| GSTK1|82081|ES | 0.496268 | 7.504435 | 0.00262 | 21493.45 | 0.619706 |
| LIMK1|80059|AP | 0.496263 | 1.784671 | 0.181152 | 17.58221 | 0.619709 |
| HMHA1|46371|AP | 0.4962 | 1.160651 | 0.644367 | 2.090596 | 0.619753 |
| KCNAB2|361|AP | 0.496129 | 1.150992 | 0.660397 | 2.006041 | 0.619804 |
| FILIP1|76789|AT | -0.496 | 0.769556 | 0.273349 | 2.166521 | 0.619891 |
| FILIP1|76788|AT | 0.496003 | 1.29945 | 0.461569 | 3.658322 | 0.619892 |
| CNOT1|36670|AT | -0.49568 | 0.148578 | 7.90E-05 | 279.3114 | 0.620117 |
| C7orf41|79113|ES | 0.495469 | 1.47687 | 0.315836 | 6.905936 | 0.620269 |
| AP1G2|99354|ES | 0.495347 | 1.352697 | 0.40933 | 4.470206 | 0.620355 |
| C9orf9|87993|AP | -0.49523 | 0.850135 | 0.44712 | 1.616411 | 0.620438 |
| TRERF1|76177|ES | 0.494944 | 1.177693 | 0.616235 | 2.2507 | 0.62064 |
| CACNA2D4|19676|AT | 0.49468 | 1.241011 | 0.527508 | 2.919594 | 0.620826 |
| CACNA2D4|19675|AT | -0.49446 | 0.805525 | 0.341817 | 1.898297 | 0.620978 |
| MARK2|16538|ES | 0.49326 | 1.247512 | 0.518098 | 3.003843 | 0.621829 |
| PPP1R13L|50436|AP | 0.493239 | 1.234474 | 0.53452 | 2.851016 | 0.621844 |
| ZNF133|58760|AA | -0.49281 | 0.718247 | 0.192602 | 2.678469 | 0.622145 |
| CERS2|7528|AT | -0.49271 | 0.12452 | 3.13E-05 | 494.6395 | 0.622215 |
| ATXN7L2|4014|ES | -0.49256 | 0.823166 | 0.379489 | 1.785568 | 0.622326 |
| SARNP|22253|AT | 0.492213 | 1.367151 | 0.393553 | 4.749301 | 0.622569 |
| DOCK8|85702|ES | -0.49114 | 0.631372 | 0.100762 | 3.95617 | 0.623328 |
| IFITM2|13642|AP | -0.49109 | 0.101853 | 1.12E-05 | 927.2248 | 0.623362 |
| APEH|64892|ES | 0.490384 | 5.282093 | 0.006822 | 4089.908 | 0.623862 |
| ZNF511|13541|AT | 0.490373 | 1.317781 | 0.437365 | 3.970475 | 0.62387 |
| FKBP7|56166|ES | -0.49032 | 0.838317 | 0.414231 | 1.696575 | 0.623911 |
| AFTPH|53773|ES | -0.49023 | 0.73674 | 0.217187 | 2.499169 | 0.62397 |
| MRPL55|117443|ES | 0.489909 | 1.223126 | 0.546422 | 2.737883 | 0.624198 |
| ITGB6|55712|ES | -0.48923 | 0.400329 | 0.010224 | 15.67585 | 0.62468 |
| RALGDS|88012|AP | 0.48853 | 1.284112 | 0.47086 | 3.501983 | 0.625175 |
| DNM1|118812|ES | 0.48813 | 1.1975 | 0.580737 | 2.469285 | 0.625458 |
| DNAJC7|40967|AP | -0.48773 | 0.497302 | 0.030024 | 8.237151 | 0.625745 |
| AGAP3|82350|AP | 0.487695 | 1.258813 | 0.499154 | 3.174589 | 0.625766 |
| SAT1|120574|AD | -0.48712 | 0.733602 | 0.210925 | 2.551491 | 0.626176 |
| ZNF333|48018|AT | -0.4869 | 0.737402 | 0.216354 | 2.513297 | 0.626327 |
| UFD1L|118420|ES | 0.486572 | 1.274013 | 0.48031 | 3.379297 | 0.626562 |
| SYNPO2|70455|AT | 0.486459 | 1.239037 | 0.522448 | 2.938498 | 0.626642 |
| LRRFIP1|58128|AP | 0.485924 | 1.308467 | 0.442387 | 3.870105 | 0.627021 |
| LRRFIP1|58129|AP | -0.48587 | 0.764276 | 0.258399 | 2.260523 | 0.627058 |
| ANGEL2|9780|ES | 0.485815 | 1.485656 | 0.300839 | 7.336728 | 0.627099 |
| MRRF|87470|ES | 0.485722 | 1.240955 | 0.519321 | 2.965353 | 0.627164 |
| GNAI2|64970|AP | 0.485649 | 1.330872 | 0.419906 | 4.218139 | 0.627216 |
| COX16|28178|ES | 0.485473 | 1.854528 | 0.153219 | 22.44672 | 0.627341 |
| SMOX|58619|AP | 0.485048 | 1.378912 | 0.376446 | 5.050917 | 0.627642 |
| PSMC5|43009|RI | -0.48483 | 0.85029 | 0.441403 | 1.637945 | 0.6278 |
| DMKN|49170|ES | 0.484781 | 1.207609 | 0.563248 | 2.589127 | 0.627832 |
| TRIO|71583|AP | 0.48448 | 1.263745 | 0.490226 | 3.257783 | 0.628045 |
| LIMS2|55234|ES | 0.48438 | 2.096595 | 0.104848 | 41.92476 | 0.628116 |
| FAH|32178|AP | 0.484218 | 1.366412 | 0.38618 | 4.83474 | 0.628231 |
| NOL8|86868|AD | -0.48375 | 0.796635 | 0.3171 | 2.001343 | 0.628566 |
| CALD1|81856|AP | 0.483561 | 1.174529 | 0.611918 | 2.254417 | 0.628697 |
| PAM|72895|ES | 0.483165 | 1.593528 | 0.240705 | 10.54956 | 0.628979 |
| SULF2|59728|ES | -0.48303 | 0.746758 | 0.228343 | 2.442148 | 0.629076 |
| C9orf9|87992|AP | 0.482478 | 1.171361 | 0.616097 | 2.227062 | 0.629466 |
| MPV17|52973|ES | -0.48217 | 0.463135 | 0.020269 | 10.58221 | 0.629688 |
| ATP9B|46234|ES | -0.48194 | 0.826245 | 0.380195 | 1.795606 | 0.629848 |
| MUC1|8020|AA | 0.480954 | 1.379831 | 0.371546 | 5.124358 | 0.630549 |
| TBC1D1|69013|AT | 0.48042 | 1.479292 | 0.299424 | 7.308379 | 0.630929 |
| CXCR4|55453|AP | -0.4804 | 0.233734 | 0.000621 | 87.94991 | 0.630942 |
| FMNL1|41952|AP | 0.479841 | 1.168702 | 0.618244 | 2.209262 | 0.63134 |
| RBPJ|68985|ES | 0.479798 | 1.243577 | 0.510431 | 3.02976 | 0.631371 |
| RPL31|54729|AT | -0.47951 | 0.7099 | 0.174973 | 2.880197 | 0.631578 |
| WNT2B|4198|AP | 0.47811 | 1.104992 | 0.73386 | 1.663814 | 0.632572 |
| PRPF39|27396|ES | -0.47797 | 0.799808 | 0.320015 | 1.998946 | 0.63267 |
| HAGHL|32966|AP | 0.477952 | 1.31616 | 0.426631 | 4.060365 | 0.632685 |
| ARHGAP12|11154|ES | -0.47658 | 0.858522 | 0.458455 | 1.607701 | 0.633664 |
| SH3GLB2|118013|ES | -0.47654 | 0.845614 | 0.424266 | 1.685414 | 0.633691 |
| TFDP1|26389|ES | -0.47452 | 0.735075 | 0.206173 | 2.620792 | 0.635126 |
| PHACTR1|75368|AT | -0.4736 | 0.764148 | 0.251022 | 2.32618 | 0.635788 |
| SLC8B1|24640|ES | 0.47355 | 1.853367 | 0.144179 | 23.82429 | 0.635821 |
| CCNO|72031|AD | -0.4734 | 0.804054 | 0.32595 | 1.983442 | 0.635926 |
| SYNJ2|78249|AD | -0.47285 | 0.869559 | 0.487184 | 1.55205 | 0.636322 |
| TRAPPC4|19063|ES | 0.472752 | 5.676953 | 0.004243 | 7595.744 | 0.63639 |
| STRADA|42979|ES | -0.47272 | 0.857357 | 0.452941 | 1.62286 | 0.63641 |
| MYH10|39199|ES | -0.47242 | 0.85535 | 0.447324 | 1.635555 | 0.636628 |
| ENDOV|44054|AT | 0.472072 | 1.178204 | 0.596383 | 2.327642 | 0.636875 |
| CTBS|3607|ES | -0.47148 | 0.637537 | 0.098135 | 4.14178 | 0.637299 |
| TNNT1|52023|AP | 0.47136 | 1.419899 | 0.330488 | 6.100424 | 0.637383 |
| AIFM1|90067|AP | 0.470828 | 2.12483 | 0.092201 | 48.96782 | 0.637764 |
| NAT1|82857|ES | 0.470756 | 1.236592 | 0.510795 | 2.993686 | 0.637815 |
| MKNK2|46563|AP | -0.46975 | 0.635802 | 0.096097 | 4.206634 | 0.638534 |
| ATP6V1H|83833|ES | -0.46913 | 0.538002 | 0.040368 | 7.170205 | 0.638976 |
| RNF130|74994|AT | -0.46852 | 0.162916 | 8.23E-05 | 322.5033 | 0.63941 |
| WHSC1|68534|RI | -0.46833 | 0.804835 | 0.324409 | 1.996736 | 0.639545 |
| CKMT1B|30277|AP | 0.467832 | 1.282792 | 0.451897 | 3.641437 | 0.639905 |
| JKAMP|27750|ES | -0.46771 | 0.831086 | 0.382751 | 1.804576 | 0.639993 |
| SEPHS1|10796|ES | -0.46684 | 0.052612 | 2.25E-07 | 12314.05 | 0.640613 |
| LRRC27|13488|AP | -0.46578 | 0.836396 | 0.394394 | 1.773757 | 0.641372 |
| TRIM34|14068|AP | -0.46553 | 0.8687 | 0.480289 | 1.57122 | 0.64155 |
| AMDHD2|33283|ES | -0.46521 | 0.540133 | 0.040318 | 7.236001 | 0.641782 |
| ANKMY1|99333|ES | 0.465073 | 1.211605 | 0.539574 | 2.720638 | 0.64188 |
| ESRP1|84569|AD | -0.46458 | 0.775529 | 0.265363 | 2.266506 | 0.64223 |
| CSNK1A1|74039|AP | 0.464098 | 8.427837 | 0.001038 | 68418.3 | 0.642578 |
| TRIP10|47083|ES | 0.463219 | 1.317951 | 0.409811 | 4.238526 | 0.643207 |
| ARHGAP27|41961|AP | -0.46307 | 0.837487 | 0.395348 | 1.774092 | 0.643313 |
| CUL7|76216|AP | 0.462834 | 1.228093 | 0.514473 | 2.931568 | 0.643484 |
| FYN|102082|ES | 0.461303 | 1.556338 | 0.237629 | 10.19313 | 0.644582 |
| MPHOSPH8|25401|AT | -0.46092 | 0.6555 | 0.108789 | 3.949662 | 0.644856 |
| MPHOSPH8|25400|AT | 0.46089 | 1.525511 | 0.25318 | 9.191811 | 0.644877 |
| LSM1|83373|ES | -0.46069 | 0.512394 | 0.029795 | 8.811934 | 0.645022 |
| GIGYF2|58026|ES | -0.46039 | 0.834019 | 0.385127 | 1.806124 | 0.645239 |
| POP4|48845|ES | -0.46011 | 0.059306 | 3.52E-07 | 9986.11 | 0.645436 |
| TNFRSF19|25464|AP | 0.459959 | 1.140085 | 0.652106 | 1.993223 | 0.645546 |
| TCEB1|84204|ES | 0.458365 | 1.591268 | 0.218319 | 11.59834 | 0.64669 |
| PLXNC1|23722|AT | -0.45817 | 0.745112 | 0.211648 | 2.623183 | 0.646828 |
| CLASP2|63876|ES | 0.457676 | 1.220388 | 0.520088 | 2.863642 | 0.647185 |
| WNK1|19626|ES | -0.45729 | 0.827794 | 0.368239 | 1.860863 | 0.647465 |
| C1orf106|9340|AP | 0.45717 | 1.25846 | 0.46969 | 3.371843 | 0.647549 |
| SYNRG|40526|ES | -0.4571 | 0.813292 | 0.335275 | 1.97284 | 0.647598 |
| PDLIM7|74777|AT | -0.45695 | 0.797211 | 0.301578 | 2.107396 | 0.647705 |
| MUC1|7961|ES | -0.45619 | 0.847365 | 0.415944 | 1.726257 | 0.648252 |
| UBA1|88907|AP | -0.45608 | 0.7777 | 0.263992 | 2.291042 | 0.648329 |
| MAF1|119076|ES | 0.455319 | 1.234672 | 0.498263 | 3.059459 | 0.64888 |
| DNMBP|12782|AP | -0.45511 | 0.844739 | 0.408459 | 1.747015 | 0.64903 |
| FAM104B|89277|AT | 0.452698 | 1.379326 | 0.34275 | 5.550808 | 0.650766 |
| FAM104B|89278|AT | -0.45265 | 0.725019 | 0.180161 | 2.917682 | 0.650803 |
| CD68|38994|AA | 0.452061 | 3.346018 | 0.017798 | 629.0451 | 0.651225 |
| POLR2E|46386|ES | -0.45198 | 0.840688 | 0.396113 | 1.784229 | 0.651285 |
| ZEB2|55516|AT | -0.45189 | 0.623889 | 0.08062 | 4.82806 | 0.651346 |
| ZEB2|55515|AT | 0.451809 | 1.602706 | 0.207105 | 12.40274 | 0.651407 |
| EIF3M|14854|ES | 0.451122 | 3.731467 | 0.012226 | 1138.915 | 0.651901 |
| DOK2|82912|ES | 0.448489 | 1.232456 | 0.49441 | 3.072246 | 0.6538 |
| AFMID|43800|ES | -0.44824 | 0.826731 | 0.359779 | 1.899735 | 0.653978 |
| ADPGK|31594|AD | -0.44806 | 0.747348 | 0.209059 | 2.671628 | 0.654109 |
| S100A2|7720|AP | 0.447796 | 1.364211 | 0.350362 | 5.311854 | 0.654301 |
| PROM2|54495|AA | 0.447374 | 1.802633 | 0.136385 | 23.8258 | 0.654605 |
| TBL1XR1|96571|ES | -0.44682 | 0.514446 | 0.027871 | 9.495658 | 0.655001 |
| HNRNPD|69703|ES | 0.44665 | 1.621421 | 0.194466 | 13.51911 | 0.655128 |
| PTPMT1|15769|ES | 0.446521 | 1.258593 | 0.458614 | 3.454012 | 0.655221 |
| ZNF512|53020|AT | -0.44618 | 0.557719 | 0.042901 | 7.250437 | 0.65547 |
| IL18BP|17481|RI | 0.446132 | 1.144132 | 0.633252 | 2.06717 | 0.655502 |
| NISCH|65222|RI | -0.44578 | 0.85869 | 0.439474 | 1.677797 | 0.655758 |
| TSPAN31|22724|AT | -0.44548 | 0.535053 | 0.034152 | 8.38247 | 0.655976 |
| IL18BP|17483|RI | -0.4452 | 0.812829 | 0.326419 | 2.024058 | 0.656177 |
| DTX2|80180|ES | -0.4449 | 0.595003 | 0.060421 | 5.859355 | 0.656391 |
| KDM4C|85823|AP | 0.444618 | 1.175619 | 0.576126 | 2.398921 | 0.656596 |
| ARID5B|11865|AP | 0.444093 | 1.209922 | 0.521814 | 2.805427 | 0.656976 |
| ZNF567|49420|ES | -0.44387 | 0.79916 | 0.296963 | 2.150625 | 0.657135 |
| OLFM2|47443|AP | 0.443578 | 1.309947 | 0.397342 | 4.318605 | 0.657348 |
| HNRNPC|26542|AD | -0.44338 | 0.609255 | 0.068156 | 5.44623 | 0.657491 |
| NABP1|56617|AD | -0.4432 | 0.810755 | 0.320607 | 2.050249 | 0.657621 |
| EVA1C|96007|ES | 0.443018 | 1.623753 | 0.190175 | 13.8639 | 0.657753 |
| CALD1|81858|AP | -0.44127 | 0.863436 | 0.449766 | 1.657577 | 0.659019 |
| KIAA1217|10995|AP | 0.440958 | 1.241593 | 0.474528 | 3.248604 | 0.659243 |
| PTPDC1|86921|AP | -0.44015 | 0.815153 | 0.328086 | 2.025306 | 0.659831 |
| TCP1|78328|ES | -0.43949 | 0.13448 | 1.75E-05 | 1033.918 | 0.660303 |
| NADK|225|AP | 0.437953 | 1.322385 | 0.378657 | 4.618165 | 0.66142 |
| UBE2D4|79374|ES | -0.43746 | 0.447584 | 0.012209 | 16.40906 | 0.661781 |
| MROH6|85426|ES | 0.437035 | 1.937406 | 0.099799 | 37.61095 | 0.662086 |
| RBFOX2|61985|ES | 0.436582 | 1.486221 | 0.250924 | 8.802871 | 0.662414 |
| STRADA|42980|ES | -0.43626 | 0.782321 | 0.259658 | 2.357048 | 0.662648 |
| MIEF1|62309|AA | -0.43541 | 0.756948 | 0.216119 | 2.651178 | 0.663264 |
| SPATA33|38103|AP | -0.43454 | 0.8275 | 0.35226 | 1.943894 | 0.663899 |
| GRAMD1A|49011|AT | 0.433766 | 1.461452 | 0.263153 | 8.11636 | 0.664458 |
| SIVA1|29556|ES | 0.433309 | 7.793762 | 0.000721 | 84204.63 | 0.66479 |
| CD34|9667|AP | 0.433252 | 1.179406 | 0.559075 | 2.488037 | 0.664832 |
| TMPRSS4|18957|ES | -0.43321 | 0.491663 | 0.019801 | 12.20814 | 0.664862 |
| PDCD5|48889|ES | 0.432947 | 1.417229 | 0.292326 | 6.870887 | 0.665053 |
| GSDMD|85420|AP | 0.432715 | 1.259417 | 0.443054 | 3.579995 | 0.665222 |
| SP110|57859|AP | -0.43239 | 0.256765 | 0.000541 | 121.9146 | 0.665461 |
| ANK3|11845|AP | -0.43229 | 0.866274 | 0.451843 | 1.660821 | 0.665534 |
| TSKU|17903|AP | 0.431292 | 1.480748 | 0.248741 | 8.814873 | 0.666256 |
| ZMYND8|59712|ES | 0.430961 | 1.275543 | 0.421702 | 3.858201 | 0.666497 |
| CHTOP|7743|AP | -0.43094 | 0.603497 | 0.060695 | 6.000662 | 0.666515 |
| ENY2|84887|AA | 0.430923 | 1.279574 | 0.416965 | 3.926731 | 0.666525 |
| KLK11|51274|ES | -0.43033 | 0.741817 | 0.190349 | 2.890972 | 0.666959 |
| MANEA|77024|AT | 0.430284 | 1.587835 | 0.193254 | 13.04617 | 0.666989 |
| NPIPB3|34443|AP | 0.429942 | 1.332221 | 0.360309 | 4.925806 | 0.667238 |
| EXOC7|43566|ES | -0.4297 | 0.847959 | 0.399648 | 1.799169 | 0.667411 |
| MPRIP|39457|ES | 0.429348 | 1.224021 | 0.486447 | 3.079943 | 0.66767 |
| METTL6|63573|AT | -0.42861 | 0.785854 | 0.261071 | 2.365509 | 0.668206 |
| SOD2|78299|AP | 0.428216 | 3.26531 | 0.01451 | 734.8224 | 0.668494 |
| TUBB6|44669|AT | -0.42795 | 0.665521 | 0.103101 | 4.295942 | 0.668686 |
| PDLIM7|74778|AT | 0.427861 | 1.237125 | 0.466747 | 3.279035 | 0.668752 |
| CNOT8|74260|ES | -0.42713 | 0.833462 | 0.361291 | 1.922713 | 0.669283 |
| ATG16L2|17666|AA | -0.42711 | 0.827826 | 0.347831 | 1.970196 | 0.6693 |
| ZNF76|75898|AP | -0.42691 | 0.782925 | 0.254558 | 2.407979 | 0.669443 |
| FGFR1OP2|20854|AT | 0.426868 | 1.53378 | 0.215195 | 10.93187 | 0.669475 |
| IGFLR1|49259|ES | 0.426623 | 2.402384 | 0.042847 | 134.6992 | 0.669654 |
| COPS7B|57937|AP | 0.426266 | 1.343102 | 0.345991 | 5.213788 | 0.669914 |
| COPS7B|57936|AP | -0.42621 | 0.744575 | 0.191807 | 2.890374 | 0.669958 |
| FMNL1|41953|AP | -0.42617 | 0.870898 | 0.461185 | 1.644597 | 0.669984 |
| KIAA1217|10996|AP | 0.425281 | 1.191206 | 0.531853 | 2.667975 | 0.670632 |
| PRDX5|16640|ES | 0.424704 | 1.335848 | 0.351076 | 5.082914 | 0.671053 |
| CLDN7|38892|AP | -0.42433 | 0.708048 | 0.143718 | 3.488301 | 0.671324 |
| LAMB3|9672|AP | -0.42411 | 0.688839 | 0.123026 | 3.8569 | 0.671488 |
| MRAS|66991|AP | 0.423744 | 1.222813 | 0.482269 | 3.100494 | 0.671753 |
| FAM214B|86242|AP | 0.423604 | 1.205673 | 0.507447 | 2.864627 | 0.671855 |
| ECE2|67860|AT | -0.42296 | 0.560603 | 0.038367 | 8.191372 | 0.672322 |
| NCOR2|25143|AD | -0.42269 | 0.756585 | 0.207554 | 2.757943 | 0.672524 |
| DNAH14|9969|AT | -0.42245 | 0.863464 | 0.436967 | 1.706239 | 0.672697 |
| APTX|86081|ES | -0.42232 | 0.804617 | 0.293379 | 2.206731 | 0.672794 |
| COL1A1|306218|ES | -0.42167 | 0.50739 | 0.021665 | 11.88302 | 0.673262 |
| MXRA8|143|AP | 0.419492 | 1.419907 | 0.275973 | 7.305546 | 0.674857 |
| FN1|57398|ES | -0.41942 | 0.822825 | 0.330776 | 2.046823 | 0.674911 |
| N4BP2L2|25595|AT | 0.419326 | 1.311357 | 0.369389 | 4.65541 | 0.674978 |
| BTF3L4|2994|ES | 0.418595 | 4.93554 | 0.002799 | 8703.569 | 0.675512 |
| RPL32|63468|RI | -0.41833 | 0.822039 | 0.328209 | 2.058899 | 0.675703 |
| ASAH1|82845|ES | 0.41811 | 1.57739 | 0.186236 | 13.36021 | 0.675867 |
| U2SURP|67124|ES | 0.41762 | 4.796457 | 0.003057 | 7526.56 | 0.676225 |
| KTN1|27634|ES | 0.417312 | 1.393413 | 0.293352 | 6.618666 | 0.67645 |
| CD34|9666|AP | -0.41728 | 0.852971 | 0.404143 | 1.800252 | 0.676471 |
| AFMID|43814|ES | 0.415166 | 1.144347 | 0.605496 | 2.162738 | 0.678021 |
| DCTN5|35626|ES | -0.41441 | 0.854936 | 0.407392 | 1.794132 | 0.678573 |
| APBA2|29755|AP | -0.41417 | 0.749195 | 0.191049 | 2.937961 | 0.67875 |
| CUL7|76215|AP | -0.41415 | 0.83185 | 0.348063 | 1.988072 | 0.678765 |
| EPB41|1397|AP | 0.414066 | 1.130379 | 0.632835 | 2.019101 | 0.678826 |
| ADAR|7837|AP | 0.413907 | 1.270719 | 0.408645 | 3.951417 | 0.678942 |
| ADAR|7838|AP | -0.41377 | 0.78702 | 0.253095 | 2.447302 | 0.679044 |
| RBCK1|58450|AT | -0.41337 | 0.751367 | 0.193736 | 2.914023 | 0.679337 |
| ZNF250|85676|AT | -0.41335 | 0.765226 | 0.215158 | 2.721583 | 0.679352 |
| RBCK1|58451|AT | 0.41332 | 1.330865 | 0.343155 | 5.16151 | 0.679372 |
| IKBIP|23866|ES | -0.41319 | 0.801791 | 0.281177 | 2.286345 | 0.679464 |
| KCNH2|82274|AT | -0.41318 | 0.767714 | 0.219093 | 2.690117 | 0.679477 |
| KCNH2|82273|AT | 0.41311 | 1.302512 | 0.371715 | 4.564084 | 0.679526 |
| PAOX|13557|ES | -0.41285 | 0.690978 | 0.119492 | 3.995662 | 0.679715 |
| ANAPC11|44211|ES | 0.412091 | 1.600262 | 0.171012 | 14.97459 | 0.680273 |
| ATXN2L|35856|AA | 0.412015 | 1.226634 | 0.464189 | 3.241417 | 0.680329 |
| PARN|34089|AD | -0.41196 | 0.480017 | 0.014615 | 15.76582 | 0.680366 |
| SH3GLB1|3686|ES | -0.41156 | 0.307891 | 0.001127 | 84.10116 | 0.680663 |
| ARHGAP24|69813|AP | -0.41154 | 0.885827 | 0.497272 | 1.577987 | 0.68068 |
| IDH1|57209|AP | -0.41091 | 0.353281 | 0.00247 | 50.52303 | 0.681137 |
| GRASP|21881|AP | 0.410605 | 1.247096 | 0.434646 | 3.578191 | 0.681362 |
| TUBB6|44667|AT | 0.410397 | 1.475812 | 0.230026 | 9.468594 | 0.681515 |
| EFCAB10|81301|AT | 0.40962 | 1.259929 | 0.417069 | 3.806136 | 0.682084 |
| CPED1|81592|AT | -0.40944 | 0.810809 | 0.297109 | 2.212695 | 0.682218 |
| C19orf44|48173|ES | -0.40929 | 0.715852 | 0.144418 | 3.548342 | 0.682325 |
| NSMAF|83940|AP | -0.40906 | 0.767277 | 0.215635 | 2.730146 | 0.682493 |
| PLIN2|85960|AT | -0.40885 | 0.237751 | 0.000243 | 232.7713 | 0.682653 |
| ABCB9|24994|AP | 0.408218 | 1.215501 | 0.476235 | 3.102337 | 0.683114 |
| REEP5|72992|ES | -0.40816 | 0.818566 | 0.312999 | 2.14074 | 0.683154 |
| HNRNPLL|53260|AT | 0.407779 | 1.46206 | 0.235543 | 9.075283 | 0.683436 |
| ABCB9|24993|AP | 0.407682 | 1.198702 | 0.501535 | 2.864979 | 0.683507 |
| PIK3R1|72291|AP | -0.40716 | 0.898431 | 0.536503 | 1.504518 | 0.683891 |
| HM13|95906|ES | 0.406889 | 6.192546 | 0.000949 | 40388.99 | 0.684089 |
| PDIA5|66459|AA | -0.40666 | 0.380509 | 0.003613 | 40.07401 | 0.684258 |
| HMGA1|75772|AD | 0.40661 | 1.954866 | 0.077243 | 49.474 | 0.684295 |
| TEX9|30756|AT | -0.40632 | 0.749154 | 0.186011 | 3.017191 | 0.684508 |
| SGOL1|63696|AT | 0.405973 | 1.431612 | 0.253238 | 8.093242 | 0.684762 |
| PDE4DIP|4407|AP | 0.405351 | 1.146369 | 0.592213 | 2.21907 | 0.68522 |
| SLC44A2|47565|ES | 0.405302 | 6.558996 | 0.000736 | 58466.53 | 0.685255 |
| PPP2R5C|29321|ES | -0.40507 | 0.753962 | 0.19226 | 2.95671 | 0.685428 |
| SEMA4A|8189|AP | -0.40461 | 0.78539 | 0.24371 | 2.531031 | 0.685763 |
| ATP2C1|66767|AA | -0.40441 | 0.753994 | 0.19188 | 2.962822 | 0.685914 |
| LYRM1|34417|ES | 0.404313 | 1.265405 | 0.404257 | 3.960964 | 0.685983 |
| BAHD1|29981|AP | 0.404185 | 1.659673 | 0.142264 | 19.362 | 0.686076 |
| NSMAF|83939|AP | 0.404152 | 1.299135 | 0.365157 | 4.621991 | 0.686101 |
| CCNC|77075|AT | 0.404148 | 1.873608 | 0.089185 | 39.36103 | 0.686104 |
| COL1A1|265886|ES | 0.404006 | 1.32689 | 0.336452 | 5.23296 | 0.686208 |
| EIF4E3|65612|AP | -0.40393 | 0.716616 | 0.142269 | 3.609636 | 0.686261 |
| SLC2A5|556|RI | 0.403312 | 1.148676 | 0.585676 | 2.252877 | 0.686718 |
| PRDM2|721|AT | -0.40328 | 0.703959 | 0.127826 | 3.876803 | 0.686741 |
| ITGB3|42068|AT | -0.40253 | 0.882253 | 0.479377 | 1.623712 | 0.687297 |
| ATXN7L1|81305|AP | 0.401748 | 1.626755 | 0.151484 | 17.46934 | 0.68787 |
| HSD17B14|50817|ES | -0.40164 | 0.755287 | 0.192002 | 2.971109 | 0.687952 |
| HIPK2|81963|AA | 0.40119 | 1.224734 | 0.45491 | 3.297299 | 0.68828 |
| ITGB3BP|3266|ES | 0.401186 | 1.138677 | 0.603753 | 2.147543 | 0.688284 |
| DBNDD2|59544|AD | 0.400871 | 1.242513 | 0.429772 | 3.592224 | 0.688515 |
| ALDH3A1|39771|ES | 0.400454 | 1.314427 | 0.344824 | 5.010437 | 0.688822 |
| EXOC7|43568|ES | -0.39981 | 0.869038 | 0.436709 | 1.729363 | 0.689298 |
| LHFPL2|72608|AP | -0.39936 | 0.772184 | 0.217107 | 2.746417 | 0.689631 |
| BIN1|55194|ES | -0.39834 | 0.799804 | 0.266457 | 2.400714 | 0.690382 |
| NUP62|51126|ES | -0.39821 | 0.83968 | 0.355311 | 1.984354 | 0.690474 |
| RERE|544|AP | -0.39786 | 0.881675 | 0.474113 | 1.63959 | 0.690736 |
| FUZ|51092|AD | 0.396795 | 1.620319 | 0.149376 | 17.57597 | 0.691519 |
| INTS8|84578|AA | -0.39679 | 0.697534 | 0.117718 | 4.133227 | 0.691525 |
| GPD2|55624|AP | -0.39665 | 0.866962 | 0.428194 | 1.755334 | 0.691626 |
| TAB2|97300|ES | -0.39608 | 0.700813 | 0.120666 | 4.070247 | 0.692045 |
| HSPBP1|52052|AP | 0.395665 | 1.146242 | 0.582968 | 2.253761 | 0.692352 |
| CD44|15300|ES | -0.39537 | 0.612601 | 0.053969 | 6.953598 | 0.692573 |
| SPAG16|57337|ES | -0.39466 | 0.503141 | 0.016605 | 15.24588 | 0.693092 |
| TPGS2|45264|AT | 0.394267 | 1.337213 | 0.315382 | 5.669746 | 0.693384 |
| FAM76A|1340|AT | 0.393796 | 1.515307 | 0.191483 | 11.99141 | 0.693731 |
| MRPS21|7461|AP | 0.393386 | 1.311649 | 0.339481 | 5.067796 | 0.694034 |
| MRPS21|7460|AP | -0.39338 | 0.762405 | 0.197326 | 2.945686 | 0.694042 |
| ANKRD11|38077|AT | 0.392957 | 1.361196 | 0.292388 | 6.336972 | 0.694351 |
| SKA3|25447|ES | 0.392946 | 1.275804 | 0.378571 | 4.299525 | 0.694359 |
| DTX3|22663|RI | 0.391249 | 1.184324 | 0.50748 | 2.7639 | 0.695613 |
| C1orf50|90934|ES | -0.39113 | 0.689252 | 0.106781 | 4.449009 | 0.695698 |
| PDDC1|13748|ES | 0.391085 | 1.105685 | 0.668294 | 1.829344 | 0.695735 |
| FYN|77274|ES | 0.389754 | 1.670963 | 0.126395 | 22.09045 | 0.696718 |
| ABI1|11037|ES | -0.38947 | 0.845224 | 0.362634 | 1.970039 | 0.696926 |
| PKIB|77379|AP | 0.388982 | 1.106812 | 0.663742 | 1.845645 | 0.69729 |
| BLCAP|59352|AP | -0.38811 | 0.693276 | 0.109015 | 4.408844 | 0.697931 |
| NIPSNAP3B|87103|AT | -0.38808 | 0.821018 | 0.303248 | 2.222833 | 0.697957 |
| NIPSNAP3B|87104|AT | 0.38808 | 1.218 | 0.449876 | 3.297626 | 0.697957 |
| AHCYL1|4089|AP | 0.38767 | 1.246489 | 0.409177 | 3.797218 | 0.69826 |
| EFCAB10|81300|AT | -0.38704 | 0.803909 | 0.266178 | 2.427963 | 0.698729 |
| DPAGT1|19116|ES | -0.3869 | 0.220234 | 0.000103 | 469.6268 | 0.698834 |
| GAA|44019|AP | 0.386691 | 1.350635 | 0.294374 | 6.196937 | 0.698985 |
| GPATCH8|41868|AT | 0.386653 | 1.40542 | 0.250362 | 7.889392 | 0.699013 |
| MEIS3|50645|AA | 0.3864 | 1.13947 | 0.587605 | 2.209631 | 0.6992 |
| CORO1B|17209|AP | 0.386222 | 1.320368 | 0.322258 | 5.409854 | 0.699332 |
| ZBED1|88404|AP | 0.385956 | 1.218206 | 0.447108 | 3.319165 | 0.699529 |
| ZBED1|88405|AP | -0.38594 | 0.820885 | 0.301283 | 2.236606 | 0.699539 |
| RABGGTA|26950|RI | -0.38493 | 0.774599 | 0.211002 | 2.843589 | 0.700288 |
| PHF23|38856|AP | -0.3848 | 0.216992 | 9.05E-05 | 520.2589 | 0.700384 |
| ARMCX3|89663|AA | 0.384089 | 1.2672 | 0.378476 | 4.242792 | 0.700912 |
| KAZN|733|AT | -0.38345 | 0.790654 | 0.237985 | 2.626779 | 0.701389 |
| ACOT8|59631|ES | -0.38297 | 0.734459 | 0.151361 | 3.563872 | 0.701743 |
| TRMT2B|89624|ES | 0.38279 | 1.62187 | 0.136362 | 19.29036 | 0.701875 |
| FAM89B|16872|AA | -0.38234 | 0.534413 | 0.021524 | 13.26862 | 0.702206 |
| EXO1|10438|ES | 0.381729 | 1.190292 | 0.486649 | 2.91133 | 0.702662 |
| EXOSC8|25655|AA | -0.38171 | 0.318356 | 0.000892 | 113.5805 | 0.702677 |
| MARCH6|71560|AP | -0.38139 | 0.847599 | 0.362379 | 1.982519 | 0.702912 |
| MARCH6|71561|AP | 0.38138 | 1.179797 | 0.504406 | 2.759523 | 0.702921 |
| ANXA1|86607|AP | -0.38041 | 0.586957 | 0.037705 | 9.137135 | 0.703643 |
| FAM120C|89238|AT | 0.379373 | 1.129818 | 0.601381 | 2.122596 | 0.704411 |
| FAM120C|89237|AT | -0.37937 | 0.885098 | 0.471121 | 1.66284 | 0.704411 |
| FAM228B|52817|ES | 0.379271 | 1.228018 | 0.424835 | 3.549682 | 0.704486 |
| MFF|57808|ES | -0.37915 | 0.754267 | 0.175555 | 3.240689 | 0.704574 |
| RBCK1|58454|ES | -0.37805 | 0.874445 | 0.436166 | 1.753129 | 0.705393 |
| NPRL3|100478|ES | 0.378044 | 1.399557 | 0.244965 | 7.996084 | 0.705398 |
| POGZ|7634|ES | -0.37761 | 0.713705 | 0.12394 | 4.109864 | 0.705723 |
| CARF|56963|AP | -0.3776 | 0.863788 | 0.40395 | 1.847085 | 0.705725 |
| CAMTA2|38629|AP | 0.377459 | 1.146656 | 0.563411 | 2.333677 | 0.705833 |
| KLK8|95345|ES | -0.37686 | 0.876212 | 0.440692 | 1.742141 | 0.706275 |
| KLK8|95346|ES | -0.37685 | 0.869376 | 0.419793 | 1.800449 | 0.706283 |
| C21orf33|60805|AT | -0.37681 | 0.425589 | 0.005002 | 36.20773 | 0.706317 |
| SNX20|36382|AT | 0.376734 | 1.278857 | 0.355695 | 4.597966 | 0.706372 |
| PDCD2|78499|AT | -0.37658 | 0.74353 | 0.159021 | 3.476501 | 0.706485 |
| DNAH14|9968|AT | 0.376419 | 1.139768 | 0.57674 | 2.252437 | 0.706606 |
| PLXNB2|96239|ES | -0.37597 | 0.742057 | 0.156684 | 3.514394 | 0.706936 |
| DAB2|71865|ES | 0.375808 | 2.05014 | 0.048498 | 86.66407 | 0.70706 |
| KLF10|84779|AP | 0.375477 | 1.75756 | 0.092576 | 33.36741 | 0.707306 |
| SLC9A3R2|33189|AA | 0.375251 | 2.843562 | 0.012114 | 667.4561 | 0.707474 |
| MOB1A|54020|AT | 0.375241 | 6.352039 | 0.000407 | 99242.91 | 0.707481 |
| CDK11A|218|AD | -0.375 | 0.762747 | 0.185194 | 3.141478 | 0.707664 |
| LRRC29|36979|AP | 0.374196 | 1.158738 | 0.535603 | 2.506846 | 0.708258 |
| PRMT7|37215|AP | -0.37388 | 0.801892 | 0.252044 | 2.551267 | 0.70849 |
| SH3GLB2|87808|RI | 0.373821 | 2.652872 | 0.015927 | 441.8622 | 0.708538 |
| UVRAG|17878|AP | -0.37364 | 0.919413 | 0.591698 | 1.428632 | 0.708673 |
| ATP5J|60264|AD | -0.37344 | 0.476962 | 0.009796 | 23.22263 | 0.708818 |
| DCN|23664|ES | -0.37339 | 0.815389 | 0.279321 | 2.380267 | 0.708862 |
| TFIP11|61511|AP | 0.372493 | 1.744135 | 0.093421 | 32.56229 | 0.709526 |
| CAMTA2|38627|AP | -0.37237 | 0.873717 | 0.429315 | 1.778138 | 0.709617 |
| CASS4|59878|ES | -0.37184 | 0.841868 | 0.33979 | 2.085822 | 0.710009 |
| SCO2|62847|AP | -0.37154 | 0.705719 | 0.112232 | 4.437573 | 0.710239 |
| RNF213|44046|AT | 0.371432 | 1.270768 | 0.358866 | 4.499873 | 0.710315 |
| PARP8|71978|AT | 0.37108 | 1.754926 | 0.089978 | 34.22795 | 0.710578 |
| PML|31626|AT | -0.3708 | 0.80022 | 0.246376 | 2.599082 | 0.710785 |
| BCAT2|50810|AP | -0.36989 | 0.50765 | 0.013977 | 18.43816 | 0.711465 |
| TMEM184B|62221|AP | 0.369502 | 1.676688 | 0.108114 | 26.00306 | 0.711754 |
| PKMYT1|33325|AP | -0.36916 | 0.72846 | 0.135479 | 3.916865 | 0.712012 |
| NFYC|2013|AP | -0.36891 | 0.749113 | 0.16145 | 3.475818 | 0.712194 |
| ST3GAL5|54388|ES | 0.368563 | 1.212768 | 0.43477 | 3.382952 | 0.712454 |
| TMEM242|78239|AT | 0.368306 | 1.329968 | 0.291617 | 6.065529 | 0.712645 |
| FMNL3|21605|ES | 0.367913 | 1.193791 | 0.464635 | 3.067219 | 0.712938 |
| SNX24|73126|AT | 0.367707 | 1.262784 | 0.3641 | 4.379635 | 0.713092 |
| SNX24|73127|AT | -0.3674 | 0.792058 | 0.22838 | 2.746978 | 0.713319 |
| HEXA|31540|AT | -0.36735 | 0.713119 | 0.117415 | 4.331115 | 0.713356 |
| ERLIN2|83350|RI | -0.36714 | 0.84414 | 0.34165 | 2.08568 | 0.713515 |
| NLRX1|19130|AD | 0.366962 | 1.223152 | 0.417102 | 3.586896 | 0.713647 |
| DYNLT3|88788|AP | -0.36683 | 0.603712 | 0.040719 | 8.950856 | 0.713749 |
| NUP62|51128|AA | -0.36658 | 0.864291 | 0.39628 | 1.885027 | 0.713934 |
| COPE|48514|ES | -0.36632 | 0.107769 | 7.18E-07 | 16180.69 | 0.714123 |
| ACP5|47747|AP | 0.366024 | 1.230802 | 0.404813 | 3.742156 | 0.714347 |
| FBRS|36170|ES | -0.36569 | 0.42949 | 0.004631 | 39.82914 | 0.714598 |
| OPTN|10777|AP | 0.364196 | 11.22896 | 2.50E-05 | 5045006 | 0.715711 |
| USF2|49097|ES | -0.36379 | 0.504304 | 0.012616 | 20.15902 | 0.716014 |
| RTEL1|60144|AT | 0.363274 | 1.160642 | 0.519557 | 2.592765 | 0.7164 |
| RTEL1|60145|AT | -0.36327 | 0.861595 | 0.385689 | 1.924724 | 0.716406 |
| IGF1|24049|AP | 0.363053 | 1.191431 | 0.462814 | 3.067124 | 0.716565 |
| GGA1|62125|ES | -0.36305 | 0.455366 | 0.006516 | 31.82441 | 0.716571 |
| SMAGP|21828|AP | 0.36235 | 1.2113 | 0.429478 | 3.416354 | 0.71709 |
| CD200|66103|ES | -0.36227 | 0.841831 | 0.331649 | 2.136835 | 0.717148 |
| ZNF540|49542|AP | 0.3621 | 1.107979 | 0.636051 | 1.930062 | 0.717277 |
| FOXJ3|2067|AP | -0.36172 | 0.869102 | 0.406375 | 1.858724 | 0.717563 |
| LGALS9|39856|ES | 0.361175 | 1.481018 | 0.175789 | 12.47752 | 0.717969 |
| NFATC2IP|35902|AP | 0.359281 | 1.226217 | 0.403098 | 3.730129 | 0.719385 |
| ERI3|2551|ES | 0.359099 | 4.60708 | 0.001103 | 19249.13 | 0.719521 |
| SMURF2|43074|ES | 0.358833 | 1.158766 | 0.51814 | 2.591462 | 0.71972 |
| NGLY1|63753|AP | 0.358831 | 1.209366 | 0.428174 | 3.415823 | 0.719722 |
| C1orf54|7456|ES | 0.357666 | 1.219547 | 0.411 | 3.618721 | 0.720593 |
| NAP1L1|23496|ES | -0.35739 | 0.806839 | 0.248657 | 2.618022 | 0.720797 |
| DLG1|68280|AP | -0.35702 | 0.870999 | 0.408067 | 1.859106 | 0.721074 |
| TINF2|26931|RI | -0.35688 | 0.696856 | 0.09587 | 5.06526 | 0.721184 |
| PODNL1|95018|ES | -0.35673 | 0.892649 | 0.478305 | 1.66593 | 0.721297 |
| SENP6|76797|ES | -0.35587 | 0.872571 | 0.411869 | 1.848599 | 0.721938 |
| MLPH|58112|AP | -0.35526 | 0.757464 | 0.16361 | 3.506832 | 0.722393 |
| JMJD6|43615|AT | 0.355052 | 1.763808 | 0.076911 | 40.44978 | 0.722551 |
| FLI1|19413|AP | 0.354848 | 1.216345 | 0.412339 | 3.588057 | 0.722704 |
| TMEM145|50152|AT | -0.35383 | 0.910538 | 0.5418 | 1.530233 | 0.723467 |
| ARHGEF7|26288|ES | -0.35362 | 0.691801 | 0.089757 | 5.332062 | 0.723623 |
| TLR9|65188|AP | -0.35287 | 0.810796 | 0.252913 | 2.599276 | 0.724188 |
| VEGFA|76328|ES | 0.351746 | 1.254 | 0.355282 | 4.426107 | 0.725029 |
| DNMT3A|52853|AP | 0.350429 | 1.136391 | 0.555852 | 2.323249 | 0.726017 |
| NDRG2|26512|ES | 0.349895 | 1.152251 | 0.520938 | 2.548638 | 0.726417 |
| AKR1A1|2697|ES | 0.349845 | 1.433179 | 0.19083 | 10.7635 | 0.726455 |
| RCAN1|60495|AT | 0.349649 | 2.311241 | 0.021101 | 253.1563 | 0.726602 |
| TCF20|62502|ES | 0.349588 | 1.180175 | 0.466207 | 2.987544 | 0.726648 |
| PTGER2|27542|RI | 0.349484 | 1.542111 | 0.135873 | 17.50243 | 0.726726 |
| SNX21|59616|AT | -0.34912 | 0.681861 | 0.079445 | 5.852272 | 0.726998 |
| SNX21|59617|AT | 0.349067 | 1.466483 | 0.170866 | 12.58631 | 0.727039 |
| NUP62|51131|ES | 0.347894 | 1.159937 | 0.502833 | 2.675746 | 0.72792 |
| PLB1|53065|AT | 0.347606 | 1.234034 | 0.377035 | 4.038996 | 0.728136 |
| TTLL5|28526|ES | 0.347275 | 1.153109 | 0.516041 | 2.576653 | 0.728385 |
| PCNXL2|10323|AT | 0.347173 | 1.990942 | 0.040806 | 97.139 | 0.728461 |
| LRRC8A|87787|AP | 0.345844 | 1.513959 | 0.144336 | 15.88015 | 0.72946 |
| TBL2|79960|AP | 0.345795 | 3.027403 | 0.00568 | 1613.508 | 0.729497 |
| RUFY1|74894|AP | 0.345584 | 1.204926 | 0.418598 | 3.468356 | 0.729655 |
| AKT2|49868|AP | 0.345539 | 6.171601 | 0.000203 | 187798.3 | 0.729689 |
| RUFY1|74893|AP | -0.34552 | 0.829957 | 0.288333 | 2.389005 | 0.729705 |
| RAI14|71716|ES | -0.3454 | 0.856344 | 0.355194 | 2.064578 | 0.729792 |
| RQCD1|57495|AT | 0.345375 | 1.198642 | 0.428682 | 3.351537 | 0.729812 |
| RQCD1|57493|AT | -0.3453 | 0.83431 | 0.298381 | 2.332831 | 0.729869 |
| FUS|36247|ES | -0.34488 | 0.178875 | 1.01E-05 | 3164.542 | 0.730183 |
| HNRNPH1|74906|AD | 0.344699 | 2.244242 | 0.02264 | 222.4611 | 0.73032 |
| INPP5K|38317|ES | 0.344102 | 1.687299 | 0.08573 | 33.20854 | 0.73077 |
| PDCD2L|48961|AP | -0.34353 | 0.747314 | 0.141838 | 3.937427 | 0.731199 |
| ZFAND1|84310|AD | -0.34326 | 0.740885 | 0.133671 | 4.106441 | 0.731407 |
| PREPL|53440|ES | -0.34179 | 0.891475 | 0.461335 | 1.722666 | 0.732506 |
| TMEM194A|22512|ES | 0.341752 | 1.603567 | 0.106882 | 24.05858 | 0.732537 |
| WARS|29289|ES | -0.34174 | 0.624911 | 0.04215 | 9.264923 | 0.732544 |
| USP20|87872|RI | -0.3415 | 0.797225 | 0.217133 | 2.927083 | 0.732727 |
| FAIM|67013|AP | 0.341256 | 1.172417 | 0.470239 | 2.923113 | 0.732911 |
| FAIM|67012|AP | -0.34125 | 0.852944 | 0.342102 | 2.126593 | 0.732919 |
| RNF213|44047|AT | -0.34095 | 0.804281 | 0.229952 | 2.813051 | 0.733142 |
| FAM86B1|82706|ES | -0.34079 | 0.867919 | 0.384292 | 1.960183 | 0.733259 |
| NXT2|89867|AP | 0.340664 | 1.137132 | 0.542887 | 2.381839 | 0.733357 |
| CRTAC1|12750|ES | -0.34039 | 0.348128 | 0.0008 | 151.5094 | 0.733567 |
| THUMPD3|63082|AD | -0.33872 | 0.884769 | 0.43568 | 1.79677 | 0.73482 |
| SEPT11|69616|AT | -0.33865 | 0.564046 | 0.020513 | 15.5095 | 0.734873 |
| B3GALNT1|67503|ES | -0.33858 | 0.813951 | 0.247209 | 2.679984 | 0.73493 |
| CLDN11|67616|AT | 0.338574 | 1.11848 | 0.584958 | 2.138612 | 0.734931 |
| CLDN11|67617|AT | -0.33857 | 0.89407 | 0.467593 | 1.709525 | 0.734931 |
| LCA5L|60634|AT | -0.33857 | 0.8139 | 0.247102 | 2.68081 | 0.734932 |
| LCA5L|60633|AT | 0.338448 | 1.228561 | 0.372991 | 4.046645 | 0.735025 |
| TAF1D|18313|RI | -0.33784 | 0.774712 | 0.176192 | 3.406384 | 0.735485 |
| SMUG1|22125|RI | -0.337 | 0.829919 | 0.280646 | 2.454215 | 0.736115 |
| ARHGAP27|41964|AT | -0.33622 | 0.618338 | 0.037513 | 10.19223 | 0.736708 |
| FKBP11|21492|AP | -0.33545 | 0.656727 | 0.056288 | 7.662181 | 0.737283 |
| CLDND1|65748|AP | 0.334836 | 1.546874 | 0.120359 | 19.8806 | 0.737749 |
| INPP5F|13270|AP | 0.334213 | 1.144377 | 0.518915 | 2.523725 | 0.738219 |
| GUSB|79855|ES | -0.33337 | 0.822869 | 0.261537 | 2.588979 | 0.738858 |
| KLK6|51257|ES | 0.332659 | 4.134658 | 0.000965 | 17716.75 | 0.739392 |
| USP15|22829|AT | 0.332523 | 1.273828 | 0.305889 | 5.304658 | 0.739494 |
| USP15|22828|AT | -0.33249 | 0.785052 | 0.188518 | 3.269222 | 0.739517 |
| SCIMP|38666|AT | 0.332487 | 1.145982 | 0.513255 | 2.558722 | 0.739521 |
| SCIMP|38667|AT | -0.3324 | 0.872647 | 0.390836 | 1.948418 | 0.73959 |
| AFMID|43823|ES | 0.331744 | 1.09584 | 0.638145 | 1.881805 | 0.740083 |
| BAX|50836|RI | -0.33145 | 0.755313 | 0.143697 | 3.970136 | 0.740307 |
| ZNF248|11301|AT | 0.331374 | 1.326454 | 0.249465 | 7.053009 | 0.740362 |
| SEC23A|27347|AT | 0.330783 | 1.481665 | 0.144218 | 15.22235 | 0.740808 |
| CHM|89563|AT | 0.330582 | 1.357166 | 0.221961 | 8.298308 | 0.74096 |
| RPL35|87538|AD | -0.32869 | 0.901685 | 0.486456 | 1.671343 | 0.742394 |
| DDAH1|3656|AP | 0.328125 | 1.224857 | 0.364697 | 4.113748 | 0.742817 |
| CD37|50912|AT | -0.3278 | 0.67525 | 0.064536 | 7.065282 | 0.743065 |
| OGG1|63158|AT | -0.3277 | 0.812539 | 0.234759 | 2.812334 | 0.74314 |
| OGG1|63159|AT | 0.327698 | 1.23071 | 0.355577 | 4.259692 | 0.74314 |
| TRIM34|14067|AP | 0.327631 | 1.10514 | 0.607695 | 2.009782 | 0.74319 |
| HARS|73719|AP | 0.327587 | 1.283671 | 0.288118 | 5.719219 | 0.743224 |
| EPB41L2|77560|ES | 0.327338 | 1.358247 | 0.217149 | 8.495726 | 0.743412 |
| CDIPT|35972|ES | 0.326865 | 4.84684 | 0.000376 | 62465.28 | 0.74377 |
| CTNND1|15933|ES | 0.326507 | 1.128255 | 0.546784 | 2.328084 | 0.744041 |
| H6PD|559|AP | 0.326266 | 1.207414 | 0.389156 | 3.746183 | 0.744223 |
| COL1A1|265656|ES | 0.325506 | 1.466762 | 0.146104 | 14.7251 | 0.744798 |
| DDX11|20956|AP | 0.325265 | 1.234054 | 0.347519 | 4.382178 | 0.744981 |
| SRSF6|59434|ES | 0.324909 | 1.150114 | 0.494689 | 2.673927 | 0.74525 |
| TMEM9|9354|RI | -0.32424 | 0.877143 | 0.39714 | 1.937299 | 0.745755 |
| CNOT8|74294|RI | 0.323933 | 1.147434 | 0.499279 | 2.637011 | 0.745989 |
| C15orf40|32245|AT | -0.32357 | 0.703295 | 0.083406 | 5.930328 | 0.746265 |
| KYNU|55479|AT | 0.323169 | 1.750752 | 0.058629 | 52.28052 | 0.746567 |
| FCGRT|50969|ES | 0.322513 | 2.259398 | 0.015949 | 320.0826 | 0.747064 |
| MYRF|16278|ES | -0.32239 | 0.853882 | 0.326839 | 2.230807 | 0.747156 |
| MYL6|22378|ES | 0.321805 | 1.12046 | 0.560461 | 2.239999 | 0.7476 |
| MKNK1|2807|ES | 0.321639 | 1.225529 | 0.354902 | 4.231927 | 0.747726 |
| EPN2|39705|ES | -0.32159 | 0.359951 | 0.000711 | 182.2984 | 0.747765 |
| KALRN|66521|AP | 0.320789 | 1.079669 | 0.675914 | 1.724606 | 0.74837 |
| SEPT6|89964|AT | -0.32056 | 0.806573 | 0.216694 | 3.00221 | 0.748543 |
| FYN|77275|ES | 0.31942 | 2.563335 | 0.00795 | 826.4866 | 0.749408 |
| C14orf79|29589|AD | -0.31916 | 0.851987 | 0.318578 | 2.278505 | 0.749609 |
| SH3BP1|62134|AT | -0.31901 | 0.840453 | 0.288895 | 2.445048 | 0.749716 |
| SH3BP1|62132|AT | 0.319013 | 1.189833 | 0.40899 | 3.461462 | 0.749717 |
| RAB34|94477|ES | 0.318737 | 1.194907 | 0.399757 | 3.57168 | 0.749926 |
| PDZRN3|65630|AP | 0.318376 | 1.073841 | 0.692578 | 1.664989 | 0.7502 |
| COL1A1|265892|ES | 0.318026 | 1.211379 | 0.371563 | 3.949367 | 0.750465 |
| PIK3C3|45320|ES | -0.31775 | 0.545592 | 0.012996 | 22.90446 | 0.750672 |
| TMEM98|40216|AT | 0.317684 | 3.338266 | 0.001966 | 5667.652 | 0.750725 |
| PPCS|2072|AP | -0.31692 | 0.37076 | 0.000802 | 171.3915 | 0.751303 |
| WLS|3362|AT | -0.31677 | 0.761731 | 0.141405 | 4.103364 | 0.75142 |
| UAP1|8751|ES | -0.31617 | 0.862561 | 0.344938 | 2.156943 | 0.751876 |
| C10orf11|12276|AP | 0.316017 | 1.104545 | 0.596151 | 2.046494 | 0.75199 |
| APOC1|50369|ES | 0.315377 | 3.334405 | 0.001873 | 5934.825 | 0.752476 |
| FN1|57395|ES | -0.31529 | 0.57947 | 0.019495 | 17.22391 | 0.752543 |
| PKN1|47977|AP | 0.3148 | 2.342843 | 0.011687 | 469.667 | 0.752914 |
| GPD2|55623|AP | 0.314712 | 1.120472 | 0.551749 | 2.275416 | 0.75298 |
| GOLGA4|63982|ES | 0.314689 | 1.153607 | 0.473746 | 2.809123 | 0.752998 |
| AGTRAP|677|ES | -0.31416 | 0.761462 | 0.139083 | 4.16892 | 0.753402 |
| RBCK1|58455|ES | -0.31378 | 0.518052 | 0.008516 | 31.51433 | 0.753691 |
| TCTN1|24464|ES | -0.31351 | 0.270102 | 7.54E-05 | 967.1117 | 0.753896 |
| PITPNM1|17240|AP | 0.313455 | 1.298403 | 0.253679 | 6.645604 | 0.753935 |
| NUP62|51127|RI | -0.31304 | 0.818308 | 0.233178 | 2.871746 | 0.754248 |
| ELMOD3|54226|RI | 0.31292 | 1.124553 | 0.539099 | 2.3458 | 0.754341 |
| VIM|10927|AP | -0.31284 | 0.878403 | 0.389878 | 1.979061 | 0.754404 |
| NCOA6|59034|AP | 0.312698 | 1.315637 | 0.235723 | 7.342933 | 0.75451 |
| SLC44A1|87113|AT | 0.312518 | 1.298847 | 0.251986 | 6.694822 | 0.754647 |
| AIMP1|70272|AP | 0.312291 | 1.466744 | 0.132526 | 16.23329 | 0.754819 |
| BBIP1|13099|ES | 0.31224 | 1.225757 | 0.341571 | 4.398742 | 0.754858 |
| ENTPD6|139457|ES | 0.311999 | 1.157496 | 0.461841 | 2.900995 | 0.755041 |
| THUMPD3|63081|AD | 0.311545 | 1.165348 | 0.445015 | 3.051661 | 0.755387 |
| FAM72A|9578|AT | -0.31113 | 0.822954 | 0.241148 | 2.808454 | 0.755702 |
| MTA1|29645|ES | -0.31108 | 0.60934 | 0.026876 | 13.81502 | 0.755739 |
| TRIM5|14074|RI | 0.310596 | 1.137069 | 0.505536 | 2.557535 | 0.756108 |
| SLC35F6|116013|ES | -0.30987 | 0.412033 | 0.001511 | 112.3377 | 0.756659 |
| DENND1A|87519|ES | -0.3093 | 0.536917 | 0.010432 | 27.63313 | 0.757094 |
| LILRA6|51842|AT | -0.30926 | 0.863674 | 0.34116 | 2.186458 | 0.757125 |
| PPOX|8572|ES | 0.309182 | 2.092926 | 0.019384 | 225.9824 | 0.757183 |
| PCBP2|22059|AA | 0.309097 | 1.868231 | 0.035506 | 98.30038 | 0.757248 |
| SEC31A|69728|ES | -0.30811 | 0.896578 | 0.4477 | 1.795514 | 0.757999 |
| SLC35A3|3864|ES | 0.307746 | 1.173411 | 0.423776 | 3.249107 | 0.758276 |
| C11orf49|15635|ES | 0.307669 | 1.597439 | 0.080823 | 31.57281 | 0.758334 |
| PRSS36|94149|ES | 0.307237 | 1.126882 | 0.525931 | 2.414504 | 0.758663 |
| SEMA4G|12845|RI | 0.306709 | 1.115391 | 0.555075 | 2.241314 | 0.759065 |
| NCK1|66940|AP | 0.306688 | 1.108225 | 0.574674 | 2.137148 | 0.759081 |
| CABLES1|44793|AP | 0.306661 | 1.906716 | 0.030824 | 117.9442 | 0.759101 |
| NFIB|85888|ES | 0.306566 | 1.157798 | 0.453743 | 2.954311 | 0.759174 |
| DDB2|15674|ES | -0.30587 | 0.681528 | 0.05841 | 7.952074 | 0.759701 |
| CHTOP|7748|AD | -0.30546 | 0.895588 | 0.441381 | 1.817199 | 0.760016 |
| KRT15|40913|RI | -0.3048 | 0.915844 | 0.520384 | 1.611828 | 0.760515 |
| EIF3K|49679|ES | -0.30462 | 0.14918 | 7.20E-07 | 30914.08 | 0.760655 |
| CCDC40|44017|AT | 0.304514 | 1.122912 | 0.532479 | 2.368036 | 0.760736 |
| NCK1|66941|AP | -0.3044 | 0.903036 | 0.468274 | 1.741445 | 0.760823 |
| LILRA6|51841|AT | 0.304247 | 1.155086 | 0.456301 | 2.924 | 0.76094 |
| EBPL|25912|ES | 0.304223 | 1.204735 | 0.362866 | 3.99978 | 0.760958 |
| AMBRA1|15578|ES | -0.30383 | 0.83415 | 0.258938 | 2.687155 | 0.76126 |
| EVL|29239|AP | -0.30373 | 0.897597 | 0.44701 | 1.802375 | 0.761333 |
| SPG21|31148|AP | 0.303221 | 1.529973 | 0.097932 | 23.90254 | 0.761721 |
| WAC|11098|AP | 0.302529 | 1.278616 | 0.260144 | 6.284444 | 0.762249 |
| CD276|31611|AT | 0.301709 | 3.694336 | 0.00076 | 17962.76 | 0.762874 |
| ENOSF1|44465|ES | 0.300322 | 1.279528 | 0.256107 | 6.392607 | 0.763931 |
| PDCD5|48885|ES | 0.299461 | 1.478779 | 0.114259 | 19.13881 | 0.764588 |
| AP2S1|50598|AP | -0.29926 | 0.641362 | 0.034973 | 11.76177 | 0.764745 |
| POLR3H|62432|ES | -0.29908 | 0.881561 | 0.385896 | 2.013887 | 0.764882 |
| RALGDS|88015|AP | -0.2984 | 0.841996 | 0.272102 | 2.605485 | 0.765397 |
| LRP2|55860|AT | 0.29722 | 1.078813 | 0.654168 | 1.779109 | 0.766298 |
| TMEM145|50151|AT | 0.296822 | 1.081998 | 0.643017 | 1.820668 | 0.766603 |
| KBTBD4|15772|AP | 0.296501 | 1.272812 | 0.258369 | 6.270308 | 0.766847 |
| DNAJB12|12092|AD | 0.296386 | 1.334252 | 0.198178 | 8.982955 | 0.766935 |
| ABCB5|78911|AT | 0.296296 | 1.104725 | 0.571654 | 2.134887 | 0.767004 |
| HNRNPR|1049|ES | -0.29586 | 0.782266 | 0.153771 | 3.979553 | 0.767335 |
| MDM1|22926|ES | -0.29547 | 0.894255 | 0.42608 | 1.87686 | 0.767632 |
| SMAD2|45450|AT | 0.29546 | 1.370728 | 0.169227 | 11.10279 | 0.767643 |
| CLIC5|76408|AP | -0.29447 | 0.745614 | 0.105674 | 5.260904 | 0.768402 |
| PMPCB|81174|AT | -0.29446 | 0.791065 | 0.166229 | 3.764581 | 0.768403 |
| FBXO7|61933|AA | -0.29378 | 0.809794 | 0.198198 | 3.308651 | 0.768924 |
| NAAA|69565|AT | 0.292787 | 1.232734 | 0.303791 | 5.002232 | 0.769685 |
| MAGI3|4271|AT | 0.292701 | 1.772246 | 0.038404 | 81.78461 | 0.769751 |
| MS4A6A|16065|AD | 0.292234 | 2.625052 | 0.004056 | 1699.115 | 0.770108 |
| RAB4B|50006|ES | -0.29219 | 0.579468 | 0.01491 | 22.52076 | 0.770141 |
| SLC25A25|87692|AP | 0.291686 | 1.120099 | 0.522734 | 2.400113 | 0.770527 |
| SCAP|64519|ES | -0.29158 | 0.375341 | 0.000517 | 272.3333 | 0.77061 |
| ZNF286A|39375|AT | 0.290683 | 1.44504 | 0.120745 | 17.29384 | 0.771294 |
| VOPP1|79751|AP | 0.290152 | 2.156614 | 0.011999 | 387.6051 | 0.7717 |
| HNRNPUL1|50029|AP | -0.2896 | 0.749241 | 0.106188 | 5.286483 | 0.772123 |
| CCDC130|47933|AP | -0.28943 | 0.820182 | 0.214252 | 3.139752 | 0.772253 |
| CCDC130|47932|AP | 0.289429 | 1.219241 | 0.318496 | 4.667395 | 0.772253 |
| FCGRT|50957|AP | 0.288793 | 1.203162 | 0.342914 | 4.22146 | 0.77274 |
| FCGRT|50958|AP | -0.28862 | 0.831235 | 0.236913 | 2.91648 | 0.77287 |
| KXD1|48460|RI | -0.28797 | 0.218914 | 7.08E-06 | 6767.713 | 0.773369 |
| PADI2|844|AT | 0.287805 | 1.245337 | 0.279498 | 5.548745 | 0.773496 |
| CKMT1A|30305|AP | -0.28773 | 0.831322 | 0.236188 | 2.926048 | 0.773551 |
| TEFM|40127|RI | -0.28769 | 0.866245 | 0.325684 | 2.304013 | 0.773587 |
| STX17|87065|AP | 0.287483 | 1.177476 | 0.386566 | 3.586581 | 0.773743 |
| ARL6|65731|AT | -0.28735 | 0.861572 | 0.311841 | 2.3804 | 0.773841 |
| THOP1|46624|AP | 0.287295 | 1.172686 | 0.395562 | 3.476549 | 0.773887 |
| ARL6|65732|AT | 0.287196 | 1.160573 | 0.420065 | 3.206484 | 0.773962 |
| DNMT3A|52854|AP | -0.2865 | 0.900094 | 0.438099 | 1.849281 | 0.774491 |
| ITPK1|29022|ES | 0.28526 | 2.537732 | 0.004223 | 1525.151 | 0.775445 |
| HM13|58889|AD | -0.28486 | 0.828633 | 0.227333 | 3.020384 | 0.77575 |
| CTSB|82673|ES | 0.284793 | 1.263404 | 0.252767 | 6.314878 | 0.775803 |
| MYLK|66476|AP | 0.284203 | 1.075676 | 0.650422 | 1.778965 | 0.776255 |
| SNRNP40|1458|AP | -0.28368 | 0.420984 | 0.001067 | 166.0663 | 0.776659 |
| ATP6V1C2|52665|ES | 0.28319 | 1.118533 | 0.515168 | 2.428557 | 0.777031 |
| MYL12A|44492|AD | 0.282989 | 5.395397 | 4.59E-05 | 633840.3 | 0.777186 |
| LAIR1|51881|AA | -0.28237 | 0.806235 | 0.180804 | 3.595131 | 0.777658 |
| PMFBP1|37551|AT | 0.282368 | 1.104346 | 0.554504 | 2.199406 | 0.777661 |
| TSPAN4|13792|AP | -0.28219 | 0.812619 | 0.192308 | 3.433807 | 0.777799 |
| HAUS4|26678|AD | -0.28203 | 0.826491 | 0.219824 | 3.10743 | 0.777924 |
| TM4SF19|68239|AT | -0.28201 | 0.879741 | 0.361099 | 2.143299 | 0.777933 |
| TMEM205|47668|AA | -0.28198 | 0.797052 | 0.164718 | 3.856848 | 0.777962 |
| NRG1|83313|AT | 0.281634 | 1.094778 | 0.582968 | 2.055928 | 0.778224 |
| PARP3|65116|ES | -0.28159 | 0.907335 | 0.461122 | 1.785334 | 0.778258 |
| MTMR2|92805|ME | -0.28089 | 0.898882 | 0.427217 | 1.891284 | 0.778798 |
| ZC3H14|28716|ES | 0.280802 | 1.389391 | 0.139935 | 13.79505 | 0.778863 |
| CACTIN|46713|RI | 0.280546 | 1.256027 | 0.255487 | 6.174897 | 0.779058 |
| CCDC180|86996|AT | 0.280518 | 1.099805 | 0.565778 | 2.13789 | 0.77908 |
| MED1|40647|ES | 0.279247 | 1.464058 | 0.10082 | 21.26029 | 0.780055 |
| NIF3L1|56774|AA | 0.278371 | 1.199102 | 0.33392 | 4.305953 | 0.780728 |
| TOM1L1|42556|ES | -0.27814 | 0.926172 | 0.539481 | 1.590035 | 0.780905 |
| TMEM107|39131|ES | 0.277366 | 1.193317 | 0.342273 | 4.160439 | 0.781499 |
| EMR2|48029|AT | 0.277062 | 1.090049 | 0.592309 | 2.006062 | 0.781733 |
| PALLD|71121|AP | -0.2769 | 0.897218 | 0.416384 | 1.933311 | 0.781859 |
| MFSD10|68612|AP | 0.276432 | 1.191117 | 0.344683 | 4.116131 | 0.782217 |
| FAM86B1|82698|ES | 0.276102 | 1.094361 | 0.576993 | 2.075636 | 0.78247 |
| NQO1|37301|ES | -0.27565 | 0.345855 | 0.000182 | 656.88 | 0.782815 |
| DOCK8|85701|AT | -0.27553 | 0.739822 | 0.086732 | 6.310697 | 0.782908 |
| KIAA1191|74646|ES | 0.274454 | 2.186519 | 0.008194 | 583.4944 | 0.783735 |
| CCDC65|21490|AT | 0.274106 | 1.0865 | 0.600349 | 1.966325 | 0.784003 |
| PPP1R9A|80519|ES | -0.27394 | 0.92447 | 0.527067 | 1.62151 | 0.784131 |
| PYROXD1|20692|AP | 0.273914 | 1.228891 | 0.281196 | 5.370537 | 0.784151 |
| ISLR|31676|AP | 0.27354 | 1.099312 | 0.557804 | 2.166508 | 0.784438 |
| RHBDD1|57793|ES | 0.272494 | 1.114626 | 0.510673 | 2.432849 | 0.785242 |
| CCDC65|21489|AT | -0.27235 | 0.920882 | 0.508863 | 1.666508 | 0.785351 |
| ZNF738|48765|AA | 0.271352 | 1.138349 | 0.44648 | 2.902344 | 0.78612 |
| CCNG2|69629|AP | -0.2706 | 0.888646 | 0.37789 | 2.089742 | 0.786702 |
| DCAF8|8442|ES | -0.26998 | 0.549779 | 0.007145 | 42.30261 | 0.787179 |
| ACP5|47751|ES | -0.26944 | 0.862484 | 0.294025 | 2.529985 | 0.787594 |
| MAMSTR|50803|ES | -0.26933 | 0.89062 | 0.383354 | 2.069113 | 0.787672 |
| ALDOA|36035|AP | -0.26916 | 0.358268 | 0.000203 | 631.5477 | 0.787809 |
| TBRG4|79586|ES | 0.2688 | 1.282642 | 0.208859 | 7.876948 | 0.788083 |
| SPRY1|70529|AP | 0.26858 | 1.268492 | 0.223638 | 7.194994 | 0.788253 |
| ATPAF2|39532|AT | 0.26853 | 1.306563 | 0.185571 | 9.199219 | 0.788292 |
| MUTYH|2650|ES | 0.268447 | 1.126726 | 0.471505 | 2.692464 | 0.788355 |
| ECM1|7482|ES | -0.2683 | 0.319528 | 7.67E-05 | 1330.709 | 0.788466 |
| C10orf11|12277|AP | -0.26816 | 0.919037 | 0.495834 | 1.703451 | 0.788576 |
| NIPA1|29688|AP | -0.26772 | 0.912181 | 0.465418 | 1.787801 | 0.788911 |
| ANKRD54|62167|AA | -0.26742 | 0.78742 | 0.136612 | 4.538631 | 0.789145 |
| GATAD2A|121586|ES | -0.26711 | 0.893383 | 0.390639 | 2.043149 | 0.789381 |
| SH2B3|24511|AP | -0.26681 | 0.861212 | 0.287366 | 2.580978 | 0.789614 |
| ACOT2|28300|AP | -0.26655 | 0.563326 | 0.008281 | 38.32215 | 0.789816 |
| GMPPA|57710|RI | 0.26611 | 1.150446 | 0.4098 | 3.229687 | 0.790154 |
| ISLR|31677|AP | -0.26607 | 0.912028 | 0.462829 | 1.797199 | 0.790182 |
| TMUB2|41786|AT | 0.265975 | 1.640368 | 0.042761 | 62.92715 | 0.790258 |
| NSMF|88322|ES | -0.26553 | 0.823445 | 0.196292 | 3.454344 | 0.790602 |
| DGUOK|54014|ES | 0.265179 | 1.307829 | 0.179932 | 9.505901 | 0.790872 |
| TBCB|49347|AP | -0.26493 | 0.540106 | 0.005667 | 51.47411 | 0.791061 |
| FOLR1|17585|ES | 0.264592 | 1.151321 | 0.4054 | 3.269709 | 0.791323 |
| C1orf159|13|AD | -0.26437 | 0.895275 | 0.394253 | 2.033001 | 0.791495 |
| STARD10|17644|AP | -0.26406 | 0.752429 | 0.091103 | 6.214372 | 0.791736 |
| CD44|15143|ES | -0.26378 | 0.936244 | 0.573851 | 1.527492 | 0.791951 |
| NDUFB3|56780|AA | -0.26357 | 0.848671 | 0.250508 | 2.87513 | 0.792115 |
| TFDP1|26391|ES | -0.26282 | 0.903526 | 0.424009 | 1.925334 | 0.792687 |
| FAM65A|37083|AP | -0.26274 | 0.86117 | 0.282408 | 2.626039 | 0.792749 |
| RABGEF1|79899|ES | 0.262561 | 1.109061 | 0.512121 | 2.401807 | 0.792889 |
| ZNF524|52115|AP | -0.26242 | 0.884004 | 0.351985 | 2.220161 | 0.793001 |
| P2RX5|38486|AT | -0.26217 | 0.917958 | 0.484052 | 1.740821 | 0.793189 |
| RPS24|12295|ES | 0.261471 | 1.094918 | 0.554857 | 2.160639 | 0.793729 |
| COPE|48519|ES | -0.2607 | 0.911797 | 0.455413 | 1.82554 | 0.794327 |
| GMFG|49769|ES | 0.260685 | 3.351854 | 0.000377 | 29829.27 | 0.794335 |
| ABCB8|82290|AD | -0.26063 | 0.231874 | 3.91E-06 | 13757.17 | 0.794374 |
| CHN1|56047|AP | 0.260312 | 1.093057 | 0.559356 | 2.135981 | 0.794623 |
| EMR2|48028|AT | -0.26028 | 0.922167 | 0.500983 | 1.697447 | 0.794645 |
| C5orf45|74942|AT | 0.260255 | 2.94008 | 0.000873 | 9898.032 | 0.794667 |
| RAB3IP|23343|AP | -0.26022 | 0.900735 | 0.409852 | 1.979553 | 0.794692 |
| CTSL|86778|AD | 0.260142 | 1.280718 | 0.198553 | 8.260971 | 0.794754 |
| SFR1|13037|AP | 0.259335 | 1.134977 | 0.435929 | 2.955007 | 0.795376 |
| RBMS2|93175|ES | 0.258912 | 1.319277 | 0.161954 | 10.74681 | 0.795703 |
| TINF2|26933|RI | 0.25866 | 1.28345 | 0.193709 | 8.503689 | 0.795898 |
| MXRA7|43608|AP | -0.2584 | 0.164793 | 1.89E-07 | 143353.5 | 0.796096 |
| SLAMF7|8499|ES | 0.257344 | 1.197001 | 0.304311 | 4.708372 | 0.796913 |
| FLNC|81724|ES | 0.25689 | 1.268609 | 0.206529 | 7.792465 | 0.797264 |
| ITSN1|60471|ES | 0.256298 | 1.207223 | 0.285984 | 5.09604 | 0.79772 |
| ABCB8|82287|AT | -0.25598 | 0.886886 | 0.353752 | 2.223497 | 0.79797 |
| ABCB8|82288|AT | 0.255926 | 1.127515 | 0.449732 | 2.826772 | 0.798008 |
| P2RX5|38487|AT | 0.254789 | 1.08677 | 0.572993 | 2.061225 | 0.798886 |
| CCDC180|86995|AT | 0.253988 | 1.090431 | 0.559065 | 2.126836 | 0.799505 |
| SPHK2|50786|RI | 0.253384 | 1.068787 | 0.638872 | 1.788003 | 0.799972 |
| ZNF544|52431|ES | -0.25301 | 0.659933 | 0.026377 | 16.51129 | 0.800264 |
| PACSIN2|62563|ES | 0.252626 | 1.45793 | 0.078236 | 27.16856 | 0.800557 |
| RBPJ|68984|ES | 0.251856 | 1.130794 | 0.434459 | 2.943188 | 0.801153 |
| CLN6|31357|AP | -0.25172 | 0.630596 | 0.0174 | 22.85365 | 0.801259 |
| SEPT3|62473|RI | -0.25155 | 0.863746 | 0.275893 | 2.704158 | 0.801388 |
| KIAA1217|10994|AP | -0.2513 | 0.920559 | 0.482705 | 1.755586 | 0.801582 |
| UMPS|66536|ES | 0.250879 | 1.898891 | 0.012669 | 284.6101 | 0.801908 |
| SNAPIN|7752|ES | -0.25084 | 0.65464 | 0.023895 | 17.93476 | 0.801939 |
| PPP3CB|12155|ES | -0.25068 | 0.870438 | 0.29415 | 2.57577 | 0.802063 |
| PMFBP1|37552|AT | -0.25036 | 0.915939 | 0.460619 | 1.821344 | 0.802306 |
| FAM129B|87639|AP | -0.25011 | 0.533865 | 0.003903 | 73.01729 | 0.802506 |
| CAAP1|86035|AD | 0.249583 | 1.143124 | 0.399843 | 3.268113 | 0.80291 |
| MKNK1|2798|AP | 0.249482 | 1.232099 | 0.239067 | 6.349975 | 0.802988 |
| UCHL5|9248|ES | 0.249477 | 1.208352 | 0.273186 | 5.344769 | 0.802992 |
| SIGLEC10|51333|RI | 0.249473 | 1.47744 | 0.068829 | 31.71382 | 0.802995 |
| PPP2R1B|18672|AT | 0.249454 | 1.17894 | 0.323431 | 4.297358 | 0.803009 |
| PPP2R1B|18674|AT | -0.24937 | 0.848265 | 0.232713 | 3.092012 | 0.803071 |
| IGFLR1|49258|AA | 0.249335 | 1.248708 | 0.217873 | 7.156782 | 0.803101 |
| SMAD7|45459|AP | 0.249194 | 1.453461 | 0.076748 | 27.52589 | 0.803211 |
| TMX2|15906|ES | -0.24857 | 0.846875 | 0.228392 | 3.1402 | 0.803692 |
| PPP4C|36058|ES | 0.248378 | 2.254693 | 0.003689 | 1378.211 | 0.803842 |
| KRTCAP3|53016|ES | -0.24804 | 0.576126 | 0.007383 | 44.9601 | 0.8041 |
| CLN3|35717|AT | -0.24776 | 0.761285 | 0.088002 | 6.58567 | 0.804321 |
| DTYMK|58406|ES | 0.24742 | 1.25717 | 0.205133 | 7.70465 | 0.804583 |
| ZNF568|49430|AP | 0.247089 | 1.126403 | 0.438174 | 2.895622 | 0.804839 |
| CMTM7|124533|ES | 0.246892 | 1.225836 | 0.243448 | 6.172469 | 0.804992 |
| MRPL22|74297|ES | 0.246726 | 1.426274 | 0.084963 | 23.94276 | 0.80512 |
| CACNB3|21470|AP | 0.246661 | 1.120936 | 0.452494 | 2.776823 | 0.805171 |
| ARL6IP4|25026|AA | -0.24663 | 0.737098 | 0.065275 | 8.323435 | 0.805195 |
| ANKS6|87048|ES | 0.246106 | 1.228609 | 0.238414 | 6.331344 | 0.8056 |
| INPP5F|13271|AP | -0.24593 | 0.904178 | 0.405154 | 2.017843 | 0.805733 |
| TLR5|9908|ES | -0.24548 | 0.890809 | 0.353877 | 2.242422 | 0.806086 |
| RAMP2|41120|AP | -0.24484 | 0.715181 | 0.048868 | 10.4666 | 0.806577 |
| COL6A3|58109|ES | 0.244833 | 1.106357 | 0.492607 | 2.484793 | 0.806586 |
| MUC1|121769|ES | 0.24454 | 1.167706 | 0.337026 | 4.045791 | 0.806813 |
| KLC1|29487|AD | -0.24404 | 0.897485 | 0.376505 | 2.139359 | 0.807201 |
| INTS9|83228|ES | -0.24326 | 0.681996 | 0.031228 | 14.89428 | 0.807805 |
| EPB41|1398|AP | -0.24268 | 0.927738 | 0.506226 | 1.700225 | 0.808252 |
| WFS1|68712|AA | 0.242336 | 1.2296 | 0.231085 | 6.542684 | 0.80852 |
| PHYKPL|100587|ES | -0.2422 | 0.776752 | 0.100559 | 5.99992 | 0.808623 |
| COQ10A|22415|AP | 0.239828 | 1.091363 | 0.53416 | 2.229806 | 0.810463 |
| PPP1R1A|22194|AT | -0.2396 | 0.925647 | 0.492007 | 1.741487 | 0.810637 |
| ZNF524|52116|AP | 0.238582 | 1.118542 | 0.445626 | 2.807592 | 0.81143 |
| MAF|37687|RI | -0.2378 | 0.860057 | 0.248251 | 2.979644 | 0.812039 |
| TMEM161A|48588|AA | -0.23722 | 0.429942 | 0.000402 | 459.5116 | 0.812488 |
| ADAM15|7905|ES | 0.236964 | 1.112364 | 0.461032 | 2.683878 | 0.812685 |
| SERF1A|72416|AT | -0.23676 | 0.828614 | 0.174762 | 3.928782 | 0.812844 |
| PARD3|11211|ES | -0.23674 | 0.711313 | 0.042392 | 11.93555 | 0.812858 |
| SCRN2|42116|AP | 0.236383 | 1.145621 | 0.37111 | 3.536544 | 0.813136 |
| URGCP|79353|AP | -0.23574 | 0.869123 | 0.270769 | 2.789739 | 0.813634 |
| CDKN2AIP|71270|AD | -0.23568 | 0.886388 | 0.325132 | 2.416505 | 0.813678 |
| CXorf40A|90313|AD | 0.235656 | 1.134727 | 0.396605 | 3.246566 | 0.813699 |
| KREMEN2|33318|RI | 0.235361 | 1.083223 | 0.55668 | 2.107803 | 0.813929 |
| TAZ|90594|ES | -0.23519 | 0.852991 | 0.226712 | 3.209331 | 0.814059 |
| PLEC|85515|AP | -0.23516 | 0.884782 | 0.318963 | 2.454329 | 0.814084 |
| USP4|64853|ES | -0.23483 | 0.736747 | 0.057534 | 9.434367 | 0.81434 |
| DYSF|53936|ES | -0.23454 | 0.902142 | 0.381529 | 2.133152 | 0.814564 |
| PI4K2B|68959|AP | -0.23304 | 0.922307 | 0.467157 | 1.820909 | 0.81573 |
| CCND3|76161|ES | -0.23257 | 0.831593 | 0.175777 | 3.934221 | 0.816096 |
| SCRN2|42115|AP | -0.23226 | 0.874954 | 0.283407 | 2.701225 | 0.81634 |
| UBE2D4|79380|ES | 0.232248 | 1.079541 | 0.565891 | 2.059423 | 0.816345 |
| ZSCAN2|32291|AT | -0.23217 | 0.848506 | 0.212014 | 3.395829 | 0.816406 |
| C1orf51|7459|AA | 0.232054 | 1.108725 | 0.463697 | 2.651026 | 0.816496 |
| EARS2|35597|RI | 0.231765 | 1.21002 | 0.241347 | 6.066567 | 0.81672 |
| ALAS1|65186|ES | -0.23108 | 0.884277 | 0.311579 | 2.509619 | 0.81725 |
| TEX261|53912|ES | -0.23083 | 0.762956 | 0.076703 | 7.588997 | 0.817446 |
| KLC2|16990|AP | -0.23078 | 0.891314 | 0.335464 | 2.368184 | 0.817488 |
| PDPR|37327|AP | 0.230269 | 1.087337 | 0.533146 | 2.217596 | 0.817883 |
| TTLL11|87449|ES | -0.22961 | 0.901489 | 0.371958 | 2.184876 | 0.818398 |
| LYRM1|34415|ES | 0.229592 | 1.105742 | 0.468805 | 2.608049 | 0.818409 |
| FRMD8|16850|ES | 0.229376 | 1.167506 | 0.310846 | 4.385035 | 0.818577 |
| ATF5|51136|AT | 0.229105 | 2.101024 | 0.003665 | 1204.455 | 0.818788 |
| YLPM1|28426|AT | -0.22886 | 0.64231 | 0.014498 | 28.45712 | 0.818974 |
| OSR1|52744|AP | -0.22848 | 0.772758 | 0.084656 | 7.053867 | 0.819271 |
| NUDT22|16588|ES | -0.22832 | 0.72447 | 0.045542 | 11.52459 | 0.819395 |
| PPP1R1A|22195|AT | 0.228148 | 1.076337 | 0.572122 | 2.024919 | 0.819531 |
| MOK|29358|AP | -0.22796 | 0.943801 | 0.573992 | 1.55187 | 0.819678 |
| LDLRAD4|44741|ES | -0.22749 | 0.848947 | 0.207082 | 3.480316 | 0.820043 |
| GTDC1|55505|ES | -0.22741 | 0.83654 | 0.179647 | 3.895404 | 0.820107 |
| KIF13A|75458|ES | -0.2269 | 0.918375 | 0.44013 | 1.916281 | 0.820504 |
| PKIB|77376|AP | 0.226293 | 1.057749 | 0.650428 | 1.720148 | 0.820974 |
| HMGCL|1080|ES | -0.22557 | 0.488039 | 0.000958 | 248.5679 | 0.821535 |
| POLR2F|62180|AT | 0.224308 | 1.24061 | 0.188569 | 8.162083 | 0.822517 |
| DLEU7|25925|AT | -0.22414 | 0.937142 | 0.531208 | 1.653279 | 0.822646 |
| PALLD|71123|AP | 0.223949 | 1.091775 | 0.506287 | 2.354342 | 0.822797 |
| ZCCHC8|24959|AP | 0.223824 | 1.111419 | 0.440693 | 2.802976 | 0.822895 |
| COA1|79330|AT | -0.22375 | 0.870208 | 0.257479 | 2.941057 | 0.822952 |
| SYK|86818|AP | 0.223618 | 1.165435 | 0.304603 | 4.459049 | 0.823054 |
| CNKSR1|1240|AD | -0.22306 | 0.807733 | 0.123727 | 5.273156 | 0.823487 |
| STK25|58390|AD | 0.223046 | 1.27161 | 0.153947 | 10.50356 | 0.823499 |
| FXYD2|18921|AT | 0.223014 | 1.073181 | 0.576903 | 1.996379 | 0.823524 |
| STOX1|11962|AT | -0.22255 | 0.768129 | 0.075244 | 7.841476 | 0.823886 |
| TAZ|90590|ES | 0.222322 | 1.146006 | 0.344669 | 3.810404 | 0.824063 |
| KSR1|39851|AA | 0.221602 | 1.110234 | 0.440297 | 2.79952 | 0.824624 |
| INTS3|7759|RI | -0.22137 | 0.298339 | 6.67E-06 | 13351.06 | 0.824804 |
| ADORA3|4175|AT | 0.221288 | 1.092948 | 0.497417 | 2.401476 | 0.824868 |
| ADORA3|4174|AT | -0.22129 | 0.914957 | 0.416411 | 2.010381 | 0.824868 |
| MUC16|135519|ES | -0.22021 | 0.87758 | 0.274489 | 2.805744 | 0.825704 |
| ZNF275|90418|AP | 0.22015 | 1.112475 | 0.4307 | 2.873465 | 0.825755 |
| NAGA|62493|RI | 0.219967 | 1.200615 | 0.235447 | 6.122282 | 0.825897 |
| NIPA1|29687|AP | 0.219648 | 1.078983 | 0.547542 | 2.126238 | 0.826145 |
| SH3BP2|96674|ES | 0.219616 | 1.33577 | 0.100841 | 17.69396 | 0.82617 |
| ANKRD10|26274|ES | -0.21939 | 0.924863 | 0.460278 | 1.858379 | 0.826347 |
| ZNF568|49429|AP | -0.21939 | 0.899667 | 0.34983 | 2.313694 | 0.826348 |
| DHRS4L2|26799|AT | -0.21853 | 0.431293 | 0.000229 | 813.6206 | 0.827015 |
| RGS12|68643|ES | 0.218325 | 1.138795 | 0.354583 | 3.657401 | 0.827176 |
| ARL16|44151|ES | -0.21815 | 0.714611 | 0.034912 | 14.62748 | 0.827311 |
| MAX|27932|AT | 0.218008 | 2.319684 | 0.001203 | 4474.574 | 0.827423 |
| AGAP3|82348|AP | -0.21749 | 0.899451 | 0.346127 | 2.337322 | 0.827825 |
| KLHL7|78952|AT | -0.21715 | 0.899348 | 0.345211 | 2.342998 | 0.828093 |
| EZH2|82162|ES | 0.216138 | 1.085567 | 0.515609 | 2.28556 | 0.82888 |
| C11orf49|15609|RI | 0.21599 | 1.122558 | 0.393184 | 3.204957 | 0.828996 |
| MAP2|57225|ES | -0.21566 | 0.917368 | 0.418915 | 2.008912 | 0.829255 |
| GTF2H2|72439|ES | -0.21518 | 0.883458 | 0.285771 | 2.731202 | 0.829628 |
| NSRP1|40075|AT | 0.215168 | 1.417235 | 0.059151 | 33.95664 | 0.829636 |
| AURKA|59865|ES | 0.214924 | 1.09103 | 0.492936 | 2.414808 | 0.829827 |
| ANAPC15|17561|AP | -0.21428 | 0.832067 | 0.154828 | 4.471628 | 0.830332 |
| EVA1A|54150|AP | 0.213763 | 1.205995 | 0.216522 | 6.717224 | 0.830732 |
| TMEM167B|3989|ES | -0.21322 | 0.592048 | 0.004784 | 73.26611 | 0.831156 |
| CCZ1B|78767|ES | 0.21254 | 3.603865 | 2.65E-05 | 490992.3 | 0.831686 |
| DYNLT1|78279|ES | -0.21247 | 0.441256 | 0.000233 | 836.122 | 0.831739 |
| C19orf60|48490|ES | 0.21172 | 1.509334 | 0.033397 | 68.21253 | 0.832326 |
| MUC1|7963|ES | -0.21165 | 0.53204 | 0.001542 | 183.5577 | 0.832378 |
| CLN3|35708|AP | 0.211492 | 1.065695 | 0.590948 | 1.921836 | 0.832503 |
| ITGB1|11184|AP | -0.21129 | 0.390394 | 6.34E-05 | 2402.815 | 0.832658 |
| ME3|18196|AT | -0.21104 | 0.475635 | 0.000479 | 472.5712 | 0.832855 |
| HNRNPF|11325|AP | 0.210496 | 1.099026 | 0.456222 | 2.64752 | 0.83328 |
| MUC1|7960|ES | -0.21024 | 0.525303 | 0.0013 | 212.2696 | 0.83348 |
| ATG4D|47539|ES | 0.209576 | 1.102471 | 0.442738 | 2.745287 | 0.833998 |
| OXR1|84842|AP | 0.209466 | 1.07957 | 0.527382 | 2.209919 | 0.834085 |
| MBNL2|26142|ES | 0.209434 | 1.113236 | 0.40795 | 3.037861 | 0.834109 |
| PRKACB|3584|AP | 0.208741 | 1.063119 | 0.598402 | 1.888732 | 0.83465 |
| UBALD1|33772|ES | -0.20873 | 0.883512 | 0.276156 | 2.826643 | 0.834658 |
| CD74|152982|ES | -0.20831 | 0.650703 | 0.011416 | 37.08916 | 0.834987 |
| ACAP1|38918|AP | 0.207814 | 1.074236 | 0.54675 | 2.110621 | 0.835374 |
| ARHGEF7|26286|ES | 0.207067 | 1.5396 | 0.025914 | 91.47226 | 0.835957 |
| SUPT20H|25663|AA | 0.206987 | 1.136238 | 0.339021 | 3.808129 | 0.83602 |
| NME6|64587|ES | 0.206979 | 1.089563 | 0.483609 | 2.454767 | 0.836026 |
| IGFLR1|95132|ES | 0.206887 | 1.156242 | 0.292246 | 4.57456 | 0.836098 |
| SEC31A|100885|ES | -0.20598 | 0.912792 | 0.383088 | 2.17493 | 0.836807 |
| LSR|49087|ES | 0.204735 | 1.242546 | 0.155398 | 9.935276 | 0.837779 |
| MAPK3|36078|AP | -0.20463 | 0.595735 | 0.004174 | 85.03589 | 0.83786 |
| PDLIM2|83026|ES | -0.20443 | 0.714646 | 0.028523 | 17.90522 | 0.838016 |
| CLASP1|55172|ES | 0.203867 | 1.074166 | 0.539948 | 2.136936 | 0.838457 |
| MTHFD2|54030|ES | -0.20352 | 0.66594 | 0.013276 | 33.40531 | 0.838729 |
| ARHGAP27|41957|AP | 0.203043 | 1.075875 | 0.53109 | 2.17949 | 0.839101 |
| GPNMB|78964|AT | 0.202701 | 1.384367 | 0.059629 | 32.13984 | 0.839369 |
| KAT6A|83553|ES | 0.202624 | 1.082599 | 0.50242 | 2.332752 | 0.839429 |
| SLC12A9|81002|AT | -0.20202 | 0.608068 | 0.004874 | 75.86806 | 0.839905 |
| PTPN4|55140|AP | -0.20186 | 0.846883 | 0.16866 | 4.252395 | 0.840028 |
| ZSCAN2|32289|AT | 0.201351 | 1.104079 | 0.421146 | 2.894464 | 0.840424 |
| DUS1L|44292|AP | 0.200269 | 1.537238 | 0.022865 | 103.3497 | 0.84127 |
| C11orf88|18667|RI | -0.20026 | 0.962633 | 0.66311 | 1.397449 | 0.84128 |
| NDUFA7|47217|AT | -0.19974 | 0.806513 | 0.097773 | 6.652786 | 0.841685 |
| CALHM2|13011|AT | -0.19957 | 0.582262 | 0.002873 | 118.0116 | 0.84182 |
| ABCD3|3811|AT | -0.1989 | 0.515729 | 0.000756 | 351.6823 | 0.842337 |
| FLT4|75016|AT | 0.198664 | 1.103689 | 0.416998 | 2.921183 | 0.842525 |
| FLT4|75015|AT | -0.19864 | 0.906066 | 0.342331 | 2.398129 | 0.842548 |
| SLC24A1|31235|ES | 0.198335 | 1.090928 | 0.461628 | 2.578105 | 0.842783 |
| TRIM5|14072|RI | -0.1983 | 0.871623 | 0.224146 | 3.389418 | 0.842814 |
| CNNM2|12985|ES | 0.197912 | 1.09793 | 0.435268 | 2.769445 | 0.843114 |
| SLC46A1|39899|ES | -0.19744 | 0.871616 | 0.222819 | 3.409562 | 0.843481 |
| FAM89B|16874|AA | 0.197214 | 1.314708 | 0.086671 | 19.94268 | 0.84366 |
| PSTPIP1|31962|AT | -0.19715 | 0.856877 | 0.184521 | 3.979168 | 0.843707 |
| NFIX|47903|AP | 0.196656 | 1.108168 | 0.398149 | 3.084364 | 0.844097 |
| MLXIP|24926|AT | -0.19606 | 0.913007 | 0.367564 | 2.267853 | 0.844566 |
| RANGRF|39165|AA | 0.195908 | 1.165668 | 0.251493 | 5.402851 | 0.844682 |
| YIF1B|49603|AP | 0.195716 | 1.176534 | 0.230965 | 5.99325 | 0.844833 |
| RAPH1|57074|AT | -0.19516 | 0.914077 | 0.370793 | 2.25338 | 0.845271 |
| PSMG4|75172|AT | -0.19406 | 0.902726 | 0.321135 | 2.537605 | 0.846126 |
| WHSC1|68527|AT | -0.19363 | 0.56329 | 0.001689 | 187.9002 | 0.846469 |
| SLC6A8|90462|AP | -0.19357 | 0.806712 | 0.091663 | 7.099751 | 0.846516 |
| LRRC45|117269|ES | 0.193145 | 1.433274 | 0.03715 | 55.29673 | 0.846845 |
| PSMG4|75171|AT | -0.19267 | 0.916597 | 0.377949 | 2.22292 | 0.847218 |
| HMGCL|1079|AP | 0.192009 | 1.275902 | 0.106088 | 15.34509 | 0.847735 |
| PICALM|18175|ES | -0.19198 | 0.334124 | 4.61E-06 | 24235.03 | 0.847758 |
| TRIM14|87030|AT | -0.19176 | 0.577188 | 0.002098 | 158.8122 | 0.847931 |
| RARB|63744|AP | 0.191422 | 1.076215 | 0.507323 | 2.283041 | 0.848195 |
| TBRG4|97457|ES | -0.19122 | 0.898861 | 0.30133 | 2.681282 | 0.848355 |
| TOR2A|87660|ES | -0.19093 | 0.802427 | 0.083774 | 7.686069 | 0.848579 |
| BCAP31|90465|AP | 0.1909 | 1.215241 | 0.164225 | 8.992634 | 0.848604 |
| MIF4GD|43417|ES | 0.190894 | 1.351521 | 0.061323 | 29.78654 | 0.848609 |
| TMEM63A|9999|AP | -0.19071 | 0.923011 | 0.405158 | 2.102756 | 0.848755 |
| SORBS3|83015|AP | -0.19012 | 0.904272 | 0.320469 | 2.551602 | 0.849215 |
| MEFV|33476|ES | -0.18994 | 0.868412 | 0.202515 | 3.723871 | 0.849354 |
| PACRGL|68923|ES | 0.189896 | 1.069895 | 0.532724 | 2.148723 | 0.84939 |
| STAU2|84180|ES | -0.18977 | 0.870281 | 0.207231 | 3.654798 | 0.849489 |
| LIMA1|21688|AP | -0.1897 | 0.938958 | 0.489808 | 1.799974 | 0.849546 |
| PRR5|62616|AP | 0.189354 | 1.261717 | 0.113743 | 13.99585 | 0.849816 |
| DUSP18|61796|RI | -0.18932 | 0.824905 | 0.112453 | 6.051124 | 0.84984 |
| EAF2|66410|ES | 0.188466 | 1.103917 | 0.394835 | 3.086436 | 0.850511 |
| EPB41L2|77540|AD | -0.18791 | 0.807156 | 0.086395 | 7.540979 | 0.850948 |
| TMBIM4|22891|AT | -0.18723 | 0.87467 | 0.215311 | 3.553216 | 0.851477 |
| TMBIM4|22893|AT | 0.187181 | 1.143246 | 0.281424 | 4.644286 | 0.851519 |
| RILPL2|25073|ES | 0.185613 | 1.282833 | 0.092461 | 17.79846 | 0.852748 |
| IL15|70672|AP | -0.18545 | 0.898611 | 0.290325 | 2.781375 | 0.852877 |
| NCOR2|25144|ES | 0.185044 | 1.223472 | 0.144481 | 10.36045 | 0.853194 |
| HEMK1|65085|AD | -0.18456 | 0.877353 | 0.218627 | 3.520824 | 0.853574 |
| PODNL1|47947|AP | -0.18437 | 0.954542 | 0.582113 | 1.565248 | 0.853721 |
| LAT|35911|AP | -0.18437 | 0.87083 | 0.200169 | 3.788517 | 0.853721 |
| FAM32A|48144|ES | 0.183938 | 2.232312 | 0.000429 | 11613.06 | 0.854062 |
| NIF3L1|56772|ES | -0.18309 | 0.278334 | 3.15E-07 | 245681.9 | 0.854726 |
| CTNNBIP1|577|AP | 0.183013 | 1.563103 | 0.013076 | 186.8472 | 0.854788 |
| PLCXD1|88349|AP | 0.182608 | 1.066324 | 0.535241 | 2.124362 | 0.855106 |
| ATP2C1|66758|AP | -0.18208 | 0.880352 | 0.223324 | 3.470385 | 0.855517 |
| FHL3|90917|ES | 0.182038 | 1.409422 | 0.035022 | 56.72018 | 0.855553 |
| STK25|95813|ES | 0.180781 | 1.240506 | 0.119903 | 12.83418 | 0.85654 |
| LRP2|55859|AT | -0.18031 | 0.955068 | 0.579435 | 1.574214 | 0.856911 |
| EBPL|25915|ES | -0.17936 | 0.854778 | 0.153875 | 4.748308 | 0.857657 |
| ZDHHC9|90051|AP | 0.179193 | 1.232533 | 0.125219 | 12.13189 | 0.857786 |
| PCBP2|22050|AA | -0.17906 | 0.446583 | 6.57E-05 | 3034.434 | 0.857893 |
| SYS1|59525|AP | 0.178114 | 1.200673 | 0.160486 | 8.982787 | 0.858633 |
| TFRC|68219|ES | 0.17769 | 1.238545 | 0.116969 | 13.11453 | 0.858967 |
| ABLIM2|68744|AT | 0.177623 | 1.068448 | 0.514608 | 2.218352 | 0.859019 |
| ABLIM2|68745|AT | -0.17762 | 0.935939 | 0.450785 | 1.943232 | 0.859023 |
| EMP2|33986|AP | -0.17715 | 0.730347 | 0.022574 | 23.62917 | 0.859393 |
| PCLO|80263|AT | 0.176247 | 1.061339 | 0.547448 | 2.057619 | 0.8601 |
| NIF3L1|95743|AA | -0.17577 | 0.883579 | 0.222254 | 3.512704 | 0.860473 |
| CLUL1|44448|AP | 0.175627 | 1.065366 | 0.525555 | 2.159632 | 0.860587 |
| SSPN|20847|AD | 0.174621 | 1.072087 | 0.490822 | 2.341728 | 0.861377 |
| NMNAT1|589|AT | -0.17412 | 0.877189 | 0.200683 | 3.834197 | 0.861774 |
| NMNAT1|590|AT | 0.174082 | 1.139976 | 0.260804 | 4.982838 | 0.861801 |
| CDK18|9557|AD | 0.17401 | 1.090032 | 0.412802 | 2.878309 | 0.861857 |
| PPIA|79567|AD | -0.17373 | 0.90467 | 0.292158 | 2.801314 | 0.86208 |
| ZNF544|52433|AA | -0.17355 | 0.879268 | 0.205624 | 3.75983 | 0.862216 |
| FAM78A|87928|AP | 0.173335 | 1.268705 | 0.086025 | 18.71096 | 0.862388 |
| PTMS|293238|ES | -0.17329 | 0.940522 | 0.470068 | 1.881815 | 0.862424 |
| DENND3|85325|AP | 0.172691 | 1.058154 | 0.557093 | 2.009881 | 0.862895 |
| FXYD2|18922|AT | -0.17119 | 0.947106 | 0.508382 | 1.76444 | 0.864072 |
| CDYL|75229|AP | -0.17117 | 0.915327 | 0.332361 | 2.520822 | 0.86409 |
| GLUL|9148|AD | 0.170574 | 1.059933 | 0.543025 | 2.068886 | 0.864559 |
| FN1|384487|ES | 0.170535 | 1.088165 | 0.41206 | 2.873617 | 0.864589 |
| CDIP1|33753|AP | 0.170334 | 1.067151 | 0.505178 | 2.254276 | 0.864747 |
| FBXL22|31065|AT | 0.170049 | 1.090215 | 0.402858 | 2.95034 | 0.864971 |
| HSPB7|786|AP | -0.16984 | 0.93364 | 0.42272 | 2.062086 | 0.865135 |
| ARFIP1|70861|AD | -0.16941 | 0.893196 | 0.241788 | 3.299586 | 0.865474 |
| ERGIC1|74559|AT | -0.16917 | 0.186464 | 6.61E-10 | 52631400 | 0.865662 |
| FILIP1L|65812|AT | -0.16905 | 0.69974 | 0.011146 | 43.93063 | 0.865759 |
| DTD2|27120|AD | 0.168668 | 1.096074 | 0.377475 | 3.182668 | 0.866058 |
| SPI1|15728|AT | -0.16841 | 0.45853 | 5.25E-05 | 4003.521 | 0.866263 |
| SLC35A1|76960|ES | -0.1679 | 0.491589 | 0.000123 | 1957.487 | 0.866664 |
| ZNF587|52350|AP | -0.16737 | 0.937178 | 0.438378 | 2.003529 | 0.86708 |
| CHMP3|54441|ES | -0.16693 | 0.535456 | 0.00035 | 819.9681 | 0.867423 |
| MTOR|649|AP | -0.16664 | 0.952895 | 0.540232 | 1.680777 | 0.867654 |
| ALAS1|65185|ES | -0.16639 | 0.934565 | 0.421124 | 2.074001 | 0.86785 |
| FAM156B|89167|AP | 0.165702 | 1.16946 | 0.183586 | 7.449583 | 0.868391 |
| FAM47E-STBD1|69611|AP | 0.165499 | 1.102379 | 0.347548 | 3.49661 | 0.868551 |
| MRRF|87468|ES | -0.16527 | 0.498837 | 0.000131 | 1904.622 | 0.868728 |
| FAM65B|75540|AT | 0.164738 | 1.112081 | 0.314219 | 3.93587 | 0.86915 |
| TRAPPC1|39078|RI | 0.163507 | 1.202319 | 0.132075 | 10.94507 | 0.87012 |
| ATXN2L|35833|RI | 0.163404 | 1.405173 | 0.023756 | 83.11662 | 0.8702 |
| KCNMB1|74497|AT | -0.16305 | 0.883858 | 0.200383 | 3.898564 | 0.870481 |
| BECN1|41142|AD | 0.163047 | 1.159845 | 0.1951 | 6.895146 | 0.870481 |
| ZNF655|80690|ES | 0.163039 | 1.063549 | 0.507098 | 2.23061 | 0.870488 |
| MRPL55|117450|ES | -0.16288 | 0.925437 | 0.364249 | 2.351231 | 0.870611 |
| SLC39A3|46619|AT | -0.16204 | 0.7872 | 0.043567 | 14.22357 | 0.871276 |
| GPALPP1|25787|AT | -0.16121 | 0.914872 | 0.310171 | 2.698483 | 0.871925 |
| GPALPP1|25788|AT | 0.161165 | 1.093019 | 0.370569 | 3.223935 | 0.871963 |
| ELF3|116795|ES | -0.16111 | 0.923228 | 0.349373 | 2.439652 | 0.872003 |
| NAALADL1|16741|ES | 0.161066 | 1.063028 | 0.505275 | 2.236464 | 0.872042 |
| DSCR3|60558|ES | -0.16037 | 0.60705 | 0.001361 | 270.7807 | 0.872593 |
| KLHL7|78950|AT | 0.15999 | 1.084216 | 0.402649 | 2.919478 | 0.872889 |
| TGIF1|44498|AP | 0.159657 | 1.124013 | 0.267607 | 4.721124 | 0.873151 |
| DROSHA|96872|ES | -0.15916 | 0.912188 | 0.294133 | 2.828942 | 0.873543 |
| PAX8|55047|AA | 0.159156 | 1.406609 | 0.02106 | 93.94774 | 0.873546 |
| ECHDC1|77477|ES | 0.158554 | 1.906574 | 0.000654 | 5554.101 | 0.874021 |
| AGTRAP|666|AD | -0.15815 | 0.665969 | 0.00432 | 102.6692 | 0.874341 |
| SLC22A17|26733|AP | 0.157894 | 1.277239 | 0.061248 | 26.63482 | 0.874541 |
| NME1-NME2|42507|AP | 0.157788 | 1.177659 | 0.154472 | 8.978177 | 0.874624 |
| FAM65A|37081|AP | 0.156742 | 1.093487 | 0.357664 | 3.343116 | 0.875448 |
| SBNO2|46390|AP | -0.15521 | 0.940214 | 0.431662 | 2.047904 | 0.876653 |
| SBNO2|46391|AP | 0.155185 | 1.063576 | 0.488298 | 2.316606 | 0.876675 |
| RTN2|50466|ES | 0.154596 | 1.068979 | 0.458881 | 2.490224 | 0.87714 |
| LSR|49085|ES | -0.15419 | 0.917263 | 0.306021 | 2.749389 | 0.877457 |
| SCNM1|7564|AP | -0.1541 | 0.650799 | 0.002758 | 153.5454 | 0.877534 |
| AFMID|94698|ES | -0.15382 | 0.922625 | 0.330663 | 2.574329 | 0.877749 |
| C1orf162|4169|ES | -0.15355 | 0.760179 | 0.022953 | 25.17636 | 0.877968 |
| USF1|8529|AP | 0.153512 | 1.844663 | 0.000743 | 4581.495 | 0.877994 |
| TNFRSF12A|33348|ES | 0.15204 | 1.968328 | 0.000318 | 12171.35 | 0.879155 |
| AHDC1|90856|ES | -0.15146 | 0.917389 | 0.3006 | 2.799744 | 0.87961 |
| PICK1|62192|ES | 0.151335 | 1.30874 | 0.04013 | 42.68138 | 0.879711 |
| FBLN1|62666|AT | 0.150911 | 1.096864 | 0.330118 | 3.644489 | 0.880046 |
| ZNF638|53927|AP | 0.149856 | 1.142886 | 0.199245 | 6.555693 | 0.880878 |
| SCLT1|70588|AT | 0.149775 | 1.103781 | 0.303189 | 4.018393 | 0.880942 |
| MRPL48|92737|ES | -0.14966 | 0.942646 | 0.434931 | 2.043042 | 0.881032 |
| CC2D2A|68806|AT | 0.14939 | 1.08102 | 0.388992 | 3.004191 | 0.881246 |
| CC2D2A|68807|AT | -0.14935 | 0.925073 | 0.332876 | 2.570808 | 0.88128 |
| COX19|78557|AT | -0.14886 | 0.889139 | 0.18926 | 4.177151 | 0.881668 |
| COX19|78556|AT | 0.148785 | 1.124621 | 0.239384 | 5.283449 | 0.881723 |
| TMEM159|34427|ES | -0.14855 | 0.950173 | 0.484106 | 1.864942 | 0.881906 |
| COPS7A|19956|AD | -0.1478 | 0.891141 | 0.193287 | 4.108572 | 0.882499 |
| NSL1|9742|AT | -0.14765 | 0.720626 | 0.00931 | 55.78078 | 0.882616 |
| SORBS1|12641|ES | 0.146915 | 1.043298 | 0.59269 | 1.836491 | 0.883199 |
| RPGR|88808|ES | -0.14516 | 0.950695 | 0.48035 | 1.881588 | 0.884582 |
| PLAC8|69771|AP | 0.144869 | 1.039246 | 0.617353 | 1.749455 | 0.884814 |
| DROSHA|96875|ES | 0.144401 | 1.083531 | 0.364702 | 3.21917 | 0.885184 |
| CDYL|75231|AP | 0.143923 | 1.074689 | 0.402968 | 2.866128 | 0.885561 |
| SEPT9|43729|AT | -0.14363 | 0.414426 | 2.50E-06 | 68799.95 | 0.885789 |
| FBLN1|62665|AT | -0.14298 | 0.916388 | 0.276865 | 3.033122 | 0.886305 |
| CLN3|35707|AP | -0.14256 | 0.958248 | 0.533119 | 1.722389 | 0.886639 |
| CACNB3|21469|AP | -0.14211 | 0.939143 | 0.395045 | 2.232629 | 0.886995 |
| SH3BP2|68594|AP | -0.14136 | 0.936623 | 0.377835 | 2.321813 | 0.887588 |
| TMEM213|81931|AT | -0.14099 | 0.95622 | 0.513187 | 1.781721 | 0.88788 |
| TNIP1|74133|AA | -0.14065 | 0.740977 | 0.011364 | 48.31529 | 0.888147 |
| ZFYVE28|68559|AT | -0.1406 | 0.921396 | 0.294328 | 2.884438 | 0.888186 |
| PDE6D|57935|ES | 0.1399 | 1.421514 | 0.010298 | 196.2286 | 0.888739 |
| STRADA|42962|RI | 0.139607 | 1.085457 | 0.343276 | 3.432269 | 0.888971 |
| IGFLR1|95140|ES | 0.139574 | 1.071045 | 0.408539 | 2.807899 | 0.888997 |
| ZNF774|32485|AA | 0.139201 | 1.087052 | 0.335616 | 3.520936 | 0.889291 |
| PFKM|21421|AD | 0.139101 | 1.056965 | 0.484219 | 2.307167 | 0.88937 |
| MAP4K4|54753|AD | 0.138666 | 1.128132 | 0.20525 | 6.200656 | 0.889714 |
| WDR20|29345|ES | -0.13843 | 0.949364 | 0.454905 | 1.981271 | 0.889897 |
| C1QC|1015|ES | -0.13812 | 0.948107 | 0.445096 | 2.019579 | 0.890146 |
| COQ4|98232|ES | 0.137963 | 1.49244 | 0.005052 | 440.9062 | 0.890269 |
| OSBPL3|79027|ES | -0.13739 | 0.948998 | 0.449725 | 2.002552 | 0.89072 |
| CCDC90B|18085|AD | -0.13717 | 0.912659 | 0.247275 | 3.368504 | 0.890895 |
| PLXNB1|64636|AP | -0.137 | 0.939757 | 0.386345 | 2.285891 | 0.891029 |
| IL18BP|17497|AA | 0.136888 | 1.043073 | 0.570275 | 1.907855 | 0.89112 |
| DNAJC25|87229|ES | 0.136716 | 1.053928 | 0.496357 | 2.237832 | 0.891255 |
| PAM|72892|ES | 0.136673 | 1.202831 | 0.085119 | 16.99749 | 0.89129 |
| PPP1R7|58332|AT | 0.135809 | 1.086243 | 0.329183 | 3.584401 | 0.891972 |
| PPP1R7|58333|AT | -0.13581 | 0.920604 | 0.278987 | 3.037823 | 0.891972 |
| TMEM63A|10000|AP | 0.135094 | 1.058046 | 0.466647 | 2.398946 | 0.892537 |
| NPL|9165|ES | 0.134768 | 1.189219 | 0.095655 | 14.78489 | 0.892796 |
| TMC6|43759|AD | 0.134143 | 1.047856 | 0.52927 | 2.07456 | 0.893289 |
| HEXIM2|100144|ES | 0.133763 | 1.076241 | 0.366739 | 3.158364 | 0.89359 |
| NAGK|53921|ES | 0.133465 | 1.047763 | 0.528077 | 2.078879 | 0.893825 |
| PPIP5K2|72917|ES | 0.132742 | 1.049227 | 0.516093 | 2.1331 | 0.894397 |
| ZNF587|52349|AP | 0.131459 | 1.052287 | 0.492187 | 2.249771 | 0.895412 |
| PTPRO|20577|RI | -0.13123 | 0.945018 | 0.4061 | 2.199109 | 0.895592 |
| GK|88735|ES | -0.13114 | 0.952238 | 0.458242 | 1.978772 | 0.895661 |
| MRPL55|115721|ES | -0.13099 | 0.944313 | 0.400673 | 2.225577 | 0.895783 |
| KLC2|16988|AP | 0.130414 | 1.064939 | 0.413682 | 2.741463 | 0.896239 |
| WDR33|55244|AT | -0.12938 | 0.922562 | 0.272092 | 3.128062 | 0.897057 |
| CRELD1|63294|AD | -0.12912 | 0.923137 | 0.274164 | 3.108292 | 0.897266 |
| DCLRE1C|10836|AP | 0.129074 | 1.089944 | 0.294733 | 4.030696 | 0.897299 |
| EIF4G3|955|ES | -0.12896 | 0.853393 | 0.076683 | 9.497288 | 0.897393 |
| APRT|38028|ES | -0.12895 | 0.49773 | 1.23E-05 | 20061.78 | 0.897394 |
| PDE4DIP|4411|AT | 0.128931 | 1.076706 | 0.350081 | 3.311504 | 0.897412 |
| ANKRD13A|24395|AP | 0.128841 | 1.132895 | 0.169762 | 7.560288 | 0.897483 |
| FBXO44|660|ES | -0.1288 | 0.931486 | 0.316323 | 2.742972 | 0.897515 |
| AKNA|87317|AP | -0.12867 | 0.951921 | 0.449402 | 2.016353 | 0.897619 |
| CAMK2D|70405|ES | 0.128059 | 1.06888 | 0.385624 | 2.962741 | 0.898102 |
| ENDOV|44053|AT | -0.12799 | 0.953315 | 0.458442 | 1.982389 | 0.898154 |
| ECHDC2|3037|ES | 0.127502 | 1.071191 | 0.372179 | 3.083063 | 0.898543 |
| PLS3|89927|ES | 0.126827 | 1.037739 | 0.585414 | 1.839558 | 0.899077 |
| TERF1|84141|ES | 0.126708 | 1.066328 | 0.394883 | 2.879473 | 0.899172 |
| MARK2|16541|ES | -0.12659 | 0.855784 | 0.076762 | 9.540795 | 0.899268 |
| ESR2|27868|AT | -0.12646 | 0.956658 | 0.481407 | 1.901081 | 0.899366 |
| SPTAN1|87772|ES | 0.126249 | 1.049581 | 0.495167 | 2.224744 | 0.899535 |
| PLCXD1|88350|AP | -0.12549 | 0.956372 | 0.47647 | 1.919632 | 0.900139 |
| C3orf17|66189|ES | 0.125132 | 1.100043 | 0.247058 | 4.898011 | 0.900419 |
| ARHGAP12|11153|ES | 0.12459 | 1.048113 | 0.500455 | 2.195083 | 0.900848 |
| HNRNPM|94942|ES | -0.12431 | 0.788544 | 0.018626 | 33.38318 | 0.901069 |
| SEZ6L2|35977|ES | 0.123714 | 1.100082 | 0.242738 | 4.985552 | 0.901542 |
| RHBDL2|1859|AP | 0.123601 | 1.041734 | 0.544734 | 1.992183 | 0.901631 |
| RHBDF2|43587|AP | -0.12312 | 0.614686 | 0.000266 | 1422.842 | 0.902014 |
| MEF2BNB|48602|AT | -0.123 | 0.894263 | 0.150696 | 5.306763 | 0.902105 |
| PTK2B|83156|ES | -0.12267 | 0.933807 | 0.312639 | 2.789145 | 0.902367 |
| CYP11A1|31706|AP | -0.12209 | 0.962352 | 0.519736 | 1.781907 | 0.90283 |
| CCDC120|89058|AP | 0.12188 | 1.054221 | 0.450989 | 2.464323 | 0.902994 |
| HSPBP1|52051|AP | 0.120591 | 1.046271 | 0.501609 | 2.182344 | 0.904015 |
| RPS20|83888|AA | -0.12041 | 0.956049 | 0.459976 | 1.987122 | 0.904161 |
| WLS|3361|AT | 0.120118 | 1.102605 | 0.224005 | 5.427288 | 0.904389 |
| PODNL1|95020|ES | 0.119972 | 1.044983 | 0.509246 | 2.144323 | 0.904505 |
| TMEM213|81932|AT | 0.119877 | 1.038894 | 0.55672 | 1.938676 | 0.904581 |
| IFT172|95454|ES | 0.119532 | 1.04956 | 0.474845 | 2.319867 | 0.904854 |
| PDZD7|12864|AT | -0.11909 | 0.958988 | 0.481383 | 1.910449 | 0.905207 |
| UBALD1|33771|ES | -0.11871 | 0.943992 | 0.364486 | 2.444867 | 0.905505 |
| NEK6|87526|AP | -0.11866 | 0.890554 | 0.131265 | 6.041888 | 0.905548 |
| COX17|66349|AT | -0.11838 | 0.738776 | 0.004915 | 111.0434 | 0.905767 |
| TMEM256-PLSCR3|38940|RI | -0.11831 | 0.956313 | 0.456256 | 2.004432 | 0.905824 |
| PTGR2|28317|AD | -0.11743 | 0.954673 | 0.440179 | 2.070523 | 0.906516 |
| MX1|60664|AP | 0.117325 | 1.079921 | 0.29893 | 3.901343 | 0.906602 |
| CRELD1|63289|ES | -0.11666 | 0.935913 | 0.307602 | 2.847615 | 0.907126 |
| SLC7A8|26710|AP | -0.11664 | 0.95159 | 0.413374 | 2.190567 | 0.907142 |
| DYRK3|9591|ES | 0.1159 | 1.060163 | 0.394733 | 2.847351 | 0.907732 |
| ZNF618|87299|ES | 0.115861 | 1.068163 | 0.350098 | 3.259007 | 0.907763 |
| LGMN|29005|ES | 0.114893 | 1.042501 | 0.512515 | 2.120539 | 0.90853 |
| COL1A1|1008091|ES | 0.11477 | 1.116506 | 0.170029 | 7.331597 | 0.908627 |
| TPD52L2|60172|ES | -0.11454 | 0.908646 | 0.176377 | 4.681091 | 0.908812 |
| UVRAG|17880|AP | 0.114238 | 1.025624 | 0.664457 | 1.583103 | 0.909049 |
| SORBS2|71390|ES | 0.113967 | 1.037101 | 0.554289 | 1.940466 | 0.909264 |
| TCHP|24366|AT | 0.11354 | 1.179877 | 0.067884 | 20.50713 | 0.909602 |
| EVL|29241|AP | 0.113355 | 1.041392 | 0.516483 | 2.099775 | 0.909749 |
| FAM101A|25138|AP | -0.11254 | 0.937803 | 0.306494 | 2.869468 | 0.910393 |
| CXADR|60226|AT | -0.11253 | 0.929362 | 0.259447 | 3.329059 | 0.910404 |
| CXADR|60227|AT | 0.112529 | 1.076007 | 0.300385 | 3.854353 | 0.910404 |
| CD97|47968|ES | -0.11194 | 0.941296 | 0.326377 | 2.714771 | 0.910867 |
| KCNH2|82272|AP | 0.111673 | 1.093105 | 0.229145 | 5.214509 | 0.911083 |
| LPXN|16009|AP | -0.11161 | 0.966206 | 0.528296 | 1.767103 | 0.911133 |
| GIT2|24370|ES | 0.110968 | 1.041983 | 0.503959 | 2.154402 | 0.911642 |
| PCDHA9|73784|AT | -0.11073 | 0.952907 | 0.405735 | 2.237995 | 0.91183 |
| FAM21A|11563|ES | 0.110482 | 1.1003 | 0.201885 | 5.996788 | 0.912027 |
| DHRS11|40497|AA | 0.110198 | 1.302315 | 0.011869 | 142.9001 | 0.912252 |
| MBNL2|26144|ES | 0.109049 | 1.044747 | 0.475687 | 2.294567 | 0.913164 |
| GPATCH11|53214|ES | -0.10878 | 0.85179 | 0.047329 | 15.32998 | 0.913375 |
| COPB1|14469|AD | 0.108711 | 1.089197 | 0.233405 | 5.0828 | 0.913432 |
| COPS7A|19933|AP | 0.108242 | 1.053015 | 0.413248 | 2.683229 | 0.913803 |
| COPS7A|19932|AP | -0.10815 | 0.949695 | 0.372705 | 2.41993 | 0.913873 |
| OAZ1|46599|ES | -0.10793 | 0.958015 | 0.439659 | 2.087512 | 0.914048 |
| CUL7|76217|AD | 0.107934 | 1.070063 | 0.312873 | 3.659747 | 0.914048 |
| PIDD|13767|AD | 0.107625 | 1.211227 | 0.036949 | 39.70558 | 0.914293 |
| PRSS27|33295|AT | -0.10745 | 0.95579 | 0.418933 | 2.180622 | 0.914435 |
| CCDC120|89057|AP | -0.10734 | 0.954579 | 0.408505 | 2.230622 | 0.914517 |
| TLE2|46656|RI | 0.107275 | 1.037084 | 0.533197 | 2.017161 | 0.914571 |
| DRAP1|16951|AP | -0.1072 | 0.580777 | 2.81E-05 | 11986.61 | 0.91463 |
| VEGFA|76336|ES | -0.10638 | 0.939583 | 0.298043 | 2.962043 | 0.915283 |
| LAMTOR3|70083|ES | 0.106326 | 1.104077 | 0.177981 | 6.848973 | 0.915324 |
| PAX8|55051|ES | -0.10599 | 0.935704 | 0.273806 | 3.197667 | 0.915588 |
| ZNFX1|59745|AT | 0.105982 | 1.482896 | 0.001016 | 2165.396 | 0.915597 |
| CNTRL|87411|AT | 0.105877 | 1.143421 | 0.095656 | 13.66782 | 0.91568 |
| DGUOK|95568|ES | -0.10543 | 0.949798 | 0.36459 | 2.474335 | 0.916033 |
| MLLT4|78446|AT | -0.10528 | 0.867746 | 0.061874 | 12.16955 | 0.916151 |
| TNFRSF14|289|AA | 0.105099 | 1.069483 | 0.305578 | 3.743043 | 0.916297 |
| VKORC1|36233|ES | -0.10452 | 0.734934 | 0.002281 | 236.8203 | 0.916759 |
| PTGES3|93182|ES | 0.104421 | 1.075769 | 0.273122 | 4.237224 | 0.916835 |
| NAGK|53920|ES | 0.104203 | 1.762352 | 4.14E-05 | 74966.35 | 0.917008 |
| CREB3L2|81909|AP | -0.10339 | 0.743265 | 0.002681 | 206.0566 | 0.917657 |
| IQCG|68330|AP | 0.102933 | 1.038977 | 0.501657 | 2.151816 | 0.918016 |
| RAB34|94478|ES | 0.102175 | 1.43766 | 0.00136 | 1520.196 | 0.918618 |
| TMUB2|41799|ES | -0.1008 | 0.964157 | 0.474166 | 1.960492 | 0.919706 |
| NVL|9953|ES | 0.100583 | 1.055846 | 0.366202 | 3.044252 | 0.919882 |
| REEP4|82943|ES | -0.10046 | 0.783475 | 0.006707 | 91.52392 | 0.919977 |
| FLJ27365|62681|AT | -0.09909 | 0.952131 | 0.360831 | 2.512401 | 0.92107 |
| SYNC|1630|ES | -0.09908 | 0.966559 | 0.493184 | 1.894297 | 0.921078 |
| FLJ27365|62680|AT | 0.098983 | 1.050223 | 0.398005 | 2.771243 | 0.921151 |
| SLC11A2|21724|AP | -0.09898 | 0.965131 | 0.47794 | 1.948943 | 0.921153 |
| NFATC3|37186|ES | -0.09837 | 0.917523 | 0.165109 | 5.098749 | 0.92164 |
| MFSD12|46695|AT | -0.09804 | 0.947867 | 0.325014 | 2.764352 | 0.9219 |
| MFSD12|46697|AT | 0.098041 | 1.055 | 0.361748 | 3.076791 | 0.9219 |
| TRMT44|68771|AT | -0.0973 | 0.841367 | 0.025938 | 27.29245 | 0.922488 |
| SLC15A4|25186|AP | 0.096772 | 1.075322 | 0.247046 | 4.680578 | 0.922907 |
| NDUFC1|70617|AP | 0.096266 | 1.041129 | 0.458263 | 2.365346 | 0.923309 |
| NDUFC1|70618|AP | -0.09625 | 0.960502 | 0.422775 | 2.182163 | 0.923321 |
| HYAL1|65000|RI | 0.096209 | 1.028085 | 0.584757 | 1.807517 | 0.923355 |
| OSGIN2|84388|AP | -0.09566 | 0.960273 | 0.418492 | 2.203445 | 0.92379 |
| OSGIN2|84387|AP | 0.095661 | 1.04137 | 0.453835 | 2.389531 | 0.92379 |
| FMNL3|21603|ES | 0.094768 | 1.039458 | 0.466885 | 2.314216 | 0.924499 |
| RBM38|59898|ES | -0.09468 | 0.833763 | 0.019346 | 35.93301 | 0.924567 |
| SH2D3C|87662|AP | 0.093908 | 1.032595 | 0.52868 | 2.016819 | 0.925182 |
| TMEM173|73614|ES | 0.093904 | 1.083912 | 0.201652 | 5.826185 | 0.925185 |
| ZNF721|68348|AP | 0.093459 | 1.144118 | 0.067961 | 19.26111 | 0.925539 |
| MFSD12|46699|ES | 0.092737 | 1.040177 | 0.452435 | 2.391431 | 0.926112 |
| PRKAR1B|78505|AP | -0.09217 | 0.954737 | 0.35654 | 2.556576 | 0.926564 |
| PELI3|17035|ES | -0.09212 | 0.953279 | 0.344427 | 2.638415 | 0.926603 |
| STK25|58384|AP | -0.09109 | 0.942431 | 0.263129 | 3.37544 | 0.927422 |
| RBM19|24645|AT | -0.09096 | 0.951209 | 0.323746 | 2.79478 | 0.92752 |
| RBM19|24646|AT | 0.090965 | 1.051293 | 0.35781 | 3.08884 | 0.92752 |
| CARF|56964|AP | 0.089657 | 1.034305 | 0.494791 | 2.162095 | 0.92856 |
| ATXN2L|35853|AD | -0.08956 | 0.944828 | 0.272863 | 3.2716 | 0.928639 |
| SEC31A|69732|ES | -0.08923 | 0.965349 | 0.444891 | 2.094666 | 0.928902 |
| CD151|13784|ES | -0.08915 | 0.953745 | 0.336721 | 2.70143 | 0.928959 |
| RGL1|9193|AP | -0.08855 | 0.957491 | 0.36608 | 2.504342 | 0.929438 |
| FAHD2B|54591|ES | 0.088544 | 1.046742 | 0.380785 | 2.877399 | 0.929444 |
| IL4I1|51118|AP | -0.08772 | 0.939229 | 0.23143 | 3.811743 | 0.930097 |
| CGREF1|52930|AP | 0.08707 | 1.036787 | 0.45974 | 2.338121 | 0.930615 |
| NEK11|66783|AT | -0.08699 | 0.915638 | 0.125692 | 6.6702 | 0.930681 |
| ANK3|11842|AP | 0.086945 | 1.027416 | 0.558416 | 1.890318 | 0.930715 |
| BCAT2|50814|ES | -0.08681 | 0.966746 | 0.450526 | 2.074457 | 0.930819 |
| HNRNPA1|301521|ES | -0.08592 | 0.841562 | 0.016451 | 43.04966 | 0.93153 |
| GSE1|37883|ES | 0.085876 | 1.041702 | 0.409996 | 2.646719 | 0.931565 |
| DKK3|14405|AP | -0.08579 | 0.939526 | 0.225921 | 3.907163 | 0.931636 |
| KIRREL3|19406|AT | 0.085607 | 1.03515 | 0.469357 | 2.282986 | 0.931779 |
| SMARCC2|22390|RI | -0.08558 | 0.943226 | 0.247337 | 3.597019 | 0.931797 |
| RAB7L1|9570|RI | 0.08501 | 1.034702 | 0.47124 | 2.271894 | 0.932254 |
| PDLIM5|69971|AT | -0.08484 | 0.897273 | 0.073349 | 10.97632 | 0.932389 |
| SQRDL|30457|AP | -0.08389 | 0.955241 | 0.327719 | 2.78435 | 0.933141 |
| SLC3A1|53421|AT | 0.083297 | 1.04389 | 0.379938 | 2.868115 | 0.933616 |
| TFDP1|26385|AP | -0.08328 | 0.941727 | 0.229224 | 3.868916 | 0.933628 |
| ATXN7L1|81308|AT | 0.082581 | 1.054588 | 0.298704 | 3.723273 | 0.934185 |
| R3HDM2|22569|AP | 0.082232 | 1.30424 | 0.002322 | 732.5923 | 0.934462 |
| NUMB|28285|AP | 0.082169 | 1.062258 | 0.25152 | 4.486297 | 0.934512 |
| NUBP2|33138|ES | -0.08203 | 0.948171 | 0.265831 | 3.381954 | 0.934627 |
| PCED1A|58557|AP | 0.081772 | 1.12797 | 0.062921 | 20.22091 | 0.934828 |
| AKR1A1|90953|ES | 0.081557 | 1.11294 | 0.085051 | 14.56339 | 0.934999 |
| FAS|12481|ES | 0.081466 | 1.091036 | 0.134117 | 8.875545 | 0.935072 |
| MTA1|29644|ES | -0.08118 | 0.980104 | 0.603319 | 1.592201 | 0.935302 |
| LEF1|70292|ES | 0.081128 | 1.051852 | 0.310134 | 3.567474 | 0.935341 |
| ITFG3|32854|AT | 0.080772 | 1.742095 | 2.46E-06 | 1232402 | 0.935623 |
| IL4I1|51119|AP | 0.079681 | 1.058635 | 0.260645 | 4.299752 | 0.936491 |
| COPZ2|42155|ES | -0.07912 | 0.942115 | 0.215093 | 4.12649 | 0.936935 |
| ANKRD28|63631|ES | -0.07858 | 0.955154 | 0.304134 | 2.999725 | 0.937366 |
| NXNL2|86787|AT | -0.07844 | 0.97548 | 0.524581 | 1.813946 | 0.937479 |
| TMEM79|8219|AD | 0.078261 | 1.09005 | 0.125788 | 9.446103 | 0.93762 |
| ORAOV1|17371|RI | -0.0779 | 0.974093 | 0.503238 | 1.885503 | 0.937911 |
| TRIM33|4324|ES | 0.077877 | 1.053077 | 0.286544 | 3.870168 | 0.937926 |
| GPR56|36577|AP | 0.076995 | 1.060313 | 0.238776 | 4.708437 | 0.938627 |
| GMIP|48669|ES | 0.076891 | 1.047352 | 0.322054 | 3.406093 | 0.938711 |
| TM7SF2|16761|ES | -0.07614 | 0.842231 | 0.010136 | 69.98578 | 0.93931 |
| LRRC37B|40172|ES | -0.07565 | 0.92962 | 0.140337 | 6.158001 | 0.939696 |
| TEX9|30761|ES | -0.0755 | 0.926092 | 0.126197 | 6.796083 | 0.939814 |
| GSDMB|40783|AP | -0.07473 | 0.981689 | 0.604601 | 1.593966 | 0.940431 |
| MTOR|648|AP | 0.073865 | 1.021547 | 0.580222 | 1.798552 | 0.941118 |
| THTPA|26762|ES | -0.07384 | 0.963247 | 0.356497 | 2.602671 | 0.941141 |
| ZNF146|49374|ES | 0.073741 | 1.049563 | 0.290145 | 3.796667 | 0.941217 |
| KREMEN2|33319|RI | -0.07361 | 0.979246 | 0.56024 | 1.711628 | 0.94132 |
| SORBS2|71374|AP | -0.07343 | 0.974241 | 0.485473 | 1.955097 | 0.941463 |
| GSDMB|40782|AP | 0.073367 | 1.018122 | 0.630129 | 1.645016 | 0.941514 |
| MYBBP1A|38535|RI | -0.07309 | 0.816739 | 0.003585 | 186.0783 | 0.941736 |
| PSMG4|75189|ES | 0.072672 | 1.054959 | 0.249217 | 4.465743 | 0.942067 |
| PRSS27|33296|AT | 0.071503 | 1.030556 | 0.451609 | 2.351697 | 0.942997 |
| ABAT|33900|AP | 0.070728 | 1.024259 | 0.527157 | 1.990122 | 0.943614 |
| CELF2|10739|RI | 0.070316 | 1.01939 | 0.596852 | 1.741061 | 0.943942 |
| SLC48A1|21362|RI | 0.070072 | 1.435048 | 5.88E-05 | 35038.21 | 0.944136 |
| RAI2|88596|ES | -0.06997 | 0.941449 | 0.173687 | 5.103001 | 0.94422 |
| RNF167|38606|AP | 0.068761 | 1.068538 | 0.161496 | 7.069977 | 0.945179 |
| NXNL2|86786|AT | 0.068678 | 1.021972 | 0.549617 | 1.900281 | 0.945246 |
| NFE2L1|42158|AP | 0.067576 | 1.035922 | 0.372205 | 2.88318 | 0.946123 |
| DNAJC12|11899|AT | -0.0668 | 0.950238 | 0.212543 | 4.248328 | 0.946738 |
| LRR1|27427|ES | -0.0655 | 0.981121 | 0.554677 | 1.73542 | 0.947774 |
| MDFI|76115|AP | 0.065176 | 1.031793 | 0.402566 | 2.644529 | 0.948034 |
| INSR|47099|ES | 0.064954 | 1.027077 | 0.458661 | 2.299924 | 0.94821 |
| IQCG|68331|AP | -0.06457 | 0.976317 | 0.471644 | 2.021002 | 0.948518 |
| ZNF584|52456|ES | -0.06378 | 0.976886 | 0.47617 | 2.004128 | 0.949142 |
| GPATCH2L|28542|AT | 0.06349 | 1.031886 | 0.391582 | 2.719192 | 0.949376 |
| MSL1|40842|AT | 0.063453 | 1.039278 | 0.31617 | 3.416195 | 0.949406 |
| MSL1|40843|AT | -0.06345 | 0.962207 | 0.292723 | 3.162856 | 0.949406 |
| MAPK13|75950|AT | 0.063354 | 1.295574 | 0.00043 | 3905.465 | 0.949485 |
| RBMX|90221|AA | 0.063057 | 1.15156 | 0.014333 | 92.51869 | 0.949721 |
| CAPS|46956|AD | 0.062349 | 1.106209 | 0.046323 | 26.4169 | 0.950285 |
| NDUFAF2|100441|ES | 0.061863 | 1.144432 | 0.015934 | 82.19842 | 0.950672 |
| SNAPC2|47196|AP | 0.061232 | 1.030812 | 0.390225 | 2.722978 | 0.951174 |
| SNAPC2|47195|AP | -0.06119 | 0.970128 | 0.367253 | 2.562675 | 0.951207 |
| WIPF1|56026|AP | -0.061 | 0.981333 | 0.535638 | 1.797883 | 0.951358 |
| EXD3|88296|AT | 0.06097 | 1.023237 | 0.488968 | 2.141273 | 0.951383 |
| NOL8|86866|AD | -0.06009 | 0.974345 | 0.41741 | 2.274376 | 0.952083 |
| COA1|79347|ES | -0.0592 | 0.973222 | 0.39619 | 2.390672 | 0.952797 |
| STAT6|22531|ES | -0.05805 | 0.966667 | 0.307717 | 3.036709 | 0.953712 |
| LYNX1|85365|AT | -0.05784 | 0.987136 | 0.636573 | 1.530755 | 0.953874 |
| LYNX1|85366|AT | 0.057842 | 1.013031 | 0.653272 | 1.570911 | 0.953875 |
| PQBP1|89030|AD | -0.05671 | 0.962652 | 0.258306 | 3.587609 | 0.954778 |
| ECHDC2|3024|ES | 0.054323 | 1.025818 | 0.408938 | 2.573254 | 0.956678 |
| FAM60A|20989|ES | 0.054313 | 1.039872 | 0.253645 | 4.263188 | 0.956686 |
| WAC|11099|AP | 0.054064 | 1.04425 | 0.217314 | 5.017904 | 0.956884 |
| MOSPD2|88542|AA | 0.052741 | 1.084238 | 0.053682 | 21.89886 | 0.957938 |
| TRADD|36927|AP | 0.052208 | 1.023815 | 0.42315 | 2.477126 | 0.958363 |
| TRADD|36928|AP | -0.05218 | 0.976753 | 0.403699 | 2.36326 | 0.958388 |
| PKP4|95717|ES | -0.05209 | 0.958818 | 0.197056 | 4.665329 | 0.958453 |
| SPHK2|50779|AP | -0.05209 | 0.98396 | 0.535489 | 1.808027 | 0.958456 |
| TCEA2|60187|AP | -0.051 | 0.97721 | 0.402922 | 2.370036 | 0.959326 |
| ANKRD28|63624|AP | -0.05091 | 0.950603 | 0.135187 | 6.684414 | 0.959401 |
| PHC1|114208|ES | 0.050798 | 1.071733 | 0.074003 | 15.52115 | 0.959486 |
| APBB2|69101|ES | 0.050628 | 1.018428 | 0.502249 | 2.065101 | 0.959622 |
| AHNAK|16348|AT | 0.050404 | 1.027069 | 0.363539 | 2.901665 | 0.959801 |
| DHPS|47832|ES | 0.050387 | 1.080475 | 0.053217 | 21.937 | 0.959814 |
| PSMA4|32109|ES | 0.050309 | 1.248121 | 0.000222 | 7019.235 | 0.959876 |
| CHTOP|7749|ES | 0.050125 | 1.05845 | 0.114819 | 9.757201 | 0.960023 |
| WIPF1|56028|AP | -0.05005 | 0.984635 | 0.536917 | 1.805691 | 0.960086 |
| SUCO|9011|ES | 0.05002 | 1.022249 | 0.431614 | 2.421126 | 0.960107 |
| COL1A1|406319|ES | 0.049836 | 1.03293 | 0.28886 | 3.693633 | 0.960253 |
| C11orf74|15436|AP | -0.04982 | 0.937923 | 0.075363 | 11.67279 | 0.960267 |
| TMX3|45755|AT | -0.04968 | 0.961622 | 0.205326 | 4.503662 | 0.960381 |
| FN1|57392|AA | 0.049504 | 1.094499 | 0.030662 | 39.06913 | 0.960518 |
| SAMHD1|59330|AT | 0.049299 | 1.27567 | 7.98E-05 | 20396.22 | 0.960681 |
| CLEC16A|34005|ES | -0.04924 | 0.979966 | 0.437881 | 2.193138 | 0.960731 |
| ASAH1|82843|AP | 0.049004 | 1.126797 | 0.00951 | 133.5034 | 0.960916 |
| SLC7A8|26712|AP | 0.048895 | 1.02152 | 0.4351 | 2.398304 | 0.961003 |
| COL1A1|308527|ES | -0.04862 | 0.949859 | 0.119416 | 7.55535 | 0.961222 |
| RAPGEF1|87968|ES | -0.04748 | 0.971895 | 0.299611 | 3.152688 | 0.96213 |
| RNASET2|97348|ES | 0.047424 | 1.016237 | 0.522277 | 1.977376 | 0.962175 |
| SYNCRIP|76935|ES | -0.04695 | 0.929697 | 0.044325 | 19.49996 | 0.962555 |
| PIWIL4|18359|AP | -0.0469 | 0.976733 | 0.365157 | 2.6126 | 0.962596 |
| MBNL1|67311|ES | 0.046506 | 1.062617 | 0.082176 | 13.74078 | 0.962907 |
| LGMN|29011|ES | 0.046398 | 1.020288 | 0.436773 | 2.383362 | 0.962993 |
| EIF4E3|65610|AP | -0.04552 | 0.967179 | 0.229841 | 4.069916 | 0.963695 |
| AGAP3|82354|ES | 0.045185 | 1.09752 | 0.019385 | 62.1388 | 0.96396 |
| ALKBH2|24276|AA | -0.04466 | 0.956764 | 0.137521 | 6.656441 | 0.96438 |
| IL6|78936|ES | 0.04453 | 1.007668 | 0.719945 | 1.410379 | 0.964482 |
| RSPRY1|36537|AD | -0.04446 | 0.982268 | 0.446392 | 2.16144 | 0.964536 |
| PVRL3|66045|AT | -0.04429 | 0.937161 | 0.053043 | 16.55784 | 0.96467 |
| RUNX2|76398|AP | -0.04376 | 0.990602 | 0.648981 | 1.512049 | 0.965094 |
| LAS1L|89323|ES | -0.04375 | 0.952888 | 0.109661 | 8.280046 | 0.965106 |
| NFE2L1|42157|AP | -0.04369 | 0.977583 | 0.353503 | 2.703419 | 0.965155 |
| DPP9|46822|AT | 0.043343 | 1.064367 | 0.06339 | 17.87148 | 0.965428 |
| PRMT2|60964|ES | 0.042439 | 1.022732 | 0.362186 | 2.887963 | 0.966149 |
| NR1H3|15701|ES | 0.042139 | 1.046004 | 0.12912 | 8.473703 | 0.966388 |
| VDAC1|73334|AP | -0.04209 | 0.964968 | 0.183404 | 5.077124 | 0.966424 |
| QRICH1|64819|AP | -0.04199 | 0.949323 | 0.0838 | 10.75434 | 0.966504 |
| GSK3A|50139|RI | 0.041921 | 1.15155 | 0.001571 | 844.3302 | 0.966562 |
| KREMEN2|33324|AA | 0.041556 | 1.114531 | 0.006699 | 185.4158 | 0.966852 |
| MDK|15566|AP | -0.04154 | 0.95154 | 0.091295 | 9.917579 | 0.966869 |
| CARM1|47599|ES | -0.04131 | 0.973856 | 0.277052 | 3.423167 | 0.967053 |
| IDUA|68440|AP | -0.04106 | 0.975505 | 0.298575 | 3.187177 | 0.967252 |
| OARD1|76080|AP | -0.04104 | 0.968994 | 0.215285 | 4.361426 | 0.967266 |
| TUBGCP2|13527|AP | -0.04063 | 0.956604 | 0.112523 | 8.13249 | 0.967591 |
| CDIP1|33755|AP | -0.04051 | 0.984958 | 0.473089 | 2.050655 | 0.967687 |
| RPS6|85972|RI | 0.040239 | 1.014524 | 0.502623 | 2.047776 | 0.967903 |
| LY6K|85355|RI | 0.04012 | 1.010936 | 0.59425 | 1.719801 | 0.967997 |
| SLC36A4|18286|AD | 0.039658 | 1.030763 | 0.230583 | 4.607775 | 0.968365 |
| AGBL2|15794|AT | 0.039599 | 1.014176 | 0.505271 | 2.035648 | 0.968413 |
| PHF8|89235|RI | 0.039429 | 1.025375 | 0.295055 | 3.563381 | 0.968549 |
| TAGLN|18896|RI | -0.03843 | 0.983083 | 0.411817 | 2.346799 | 0.969344 |
| C21orf58|60928|RI | 0.038031 | 1.01552 | 0.459197 | 2.245835 | 0.969663 |
| VIM|10928|AP | 0.037601 | 1.01541 | 0.457567 | 2.253346 | 0.970006 |
| TMED5|3776|RI | 0.036846 | 1.013986 | 0.484363 | 2.122721 | 0.970607 |
| MRPL55|10094|AD | -0.03675 | 0.980842 | 0.349613 | 2.751757 | 0.970682 |
| CMC2|37728|ES | -0.03657 | 0.961173 | 0.115111 | 8.025787 | 0.970826 |
| SLC11A2|21738|AA | 0.036203 | 1.09498 | 0.008055 | 148.8541 | 0.97112 |
| RALGDS|88013|AP | -0.03494 | 0.981016 | 0.334737 | 2.875066 | 0.97213 |
| LPXN|16010|AP | 0.034847 | 1.010776 | 0.553151 | 1.846997 | 0.972201 |
| WIPI2|78656|ES | -0.03482 | 0.975105 | 0.235933 | 4.030076 | 0.972222 |
| PSD4|102628|ES | 0.034735 | 1.03724 | 0.131781 | 8.16404 | 0.972291 |
| DENND3|85326|AP | -0.03456 | 0.988651 | 0.517501 | 1.888751 | 0.972432 |
| ARMC6|48581|ES | -0.03446 | 0.978197 | 0.279159 | 3.427688 | 0.972514 |
| SPINT1|30054|AP | -0.03415 | 0.942365 | 0.031219 | 28.4459 | 0.97276 |
| YTHDC2|73010|ES | 0.033746 | 1.016813 | 0.386089 | 2.677903 | 0.97308 |
| ARPP19|30685|ES | 0.033686 | 1.017438 | 0.37212 | 2.781846 | 0.973127 |
| CDH23|12059|AT | 0.033016 | 1.015773 | 0.401157 | 2.57205 | 0.973661 |
| CCDC24|132898|ES | -0.0328 | 0.94465 | 0.031461 | 28.3638 | 0.973831 |
| SPHK2|50780|AP | -0.03272 | 0.989875 | 0.538061 | 1.821083 | 0.973899 |
| SMIM7|48198|ES | -0.03269 | 0.949986 | 0.043844 | 20.58387 | 0.973918 |
| UBE2L6|15862|AP | 0.032669 | 1.049124 | 0.059065 | 18.63487 | 0.973938 |
| CCNG2|69630|AP | 0.032666 | 1.014343 | 0.431626 | 2.383758 | 0.973941 |
| FBXL6|98113|ES | 0.032312 | 1.036215 | 0.119755 | 8.966135 | 0.974223 |
| PICALM|92795|ES | -0.03163 | 0.97217 | 0.169161 | 5.587072 | 0.974764 |
| FNBP1|87889|ES | -0.03151 | 0.98405 | 0.361975 | 2.675196 | 0.974863 |
| NIPA2|29682|ES | 0.031251 | 1.022004 | 0.260993 | 4.001987 | 0.975069 |
| SUCO|9012|ES | 0.03105 | 1.012924 | 0.450335 | 2.278342 | 0.97523 |
| DBF4|80348|AD | 0.030853 | 1.029444 | 0.162927 | 6.504466 | 0.975387 |
| NABP1|56614|ES | -0.03035 | 0.988234 | 0.460222 | 2.122035 | 0.975784 |
| VRK2|53649|AD | 0.030265 | 1.024687 | 0.21121 | 4.971282 | 0.975855 |
| SLC15A4|93375|ES | 0.03011 | 1.022994 | 0.232919 | 4.493038 | 0.97598 |
| PLB1|53066|ES | -0.03008 | 0.988354 | 0.460673 | 2.120469 | 0.976005 |
| PPP2R4|87833|AP | -0.02995 | 0.978119 | 0.229981 | 4.159987 | 0.976104 |
| HSPB7|785|AP | 0.029953 | 1.012189 | 0.458099 | 2.236474 | 0.976104 |
| PHLDB1|19038|RI | 0.029941 | 1.010234 | 0.518743 | 1.967394 | 0.976114 |
| SH2B1|35882|RI | 0.028953 | 1.012929 | 0.424528 | 2.416862 | 0.976902 |
| GNPDA1|73862|RI | 0.028692 | 1.009158 | 0.541388 | 1.881092 | 0.97711 |
| ITGAE|38490|ES | -0.02836 | 0.984002 | 0.322835 | 2.999237 | 0.977373 |
| CREM|11229|AP | -0.02831 | 0.985407 | 0.356142 | 2.726514 | 0.977414 |
| NME1-NME2|42506|AP | -0.02718 | 0.972141 | 0.126716 | 7.45811 | 0.978317 |
| KLC1|29490|AD | -0.02697 | 0.986502 | 0.367486 | 2.648222 | 0.97848 |
| AKR1A1|2698|ES | 0.026681 | 1.023631 | 0.184087 | 5.69199 | 0.978714 |
| VWA1|138350|ES | -0.02654 | 0.987725 | 0.396764 | 2.458893 | 0.978826 |
| HDAC8|89501|ES | -0.02649 | 0.934415 | 0.006172 | 141.4672 | 0.97887 |
| PILRA|80941|ES | 0.026248 | 1.017619 | 0.276187 | 3.74944 | 0.979059 |
| COA1|79332|AT | 0.025951 | 1.012303 | 0.401994 | 2.54919 | 0.979296 |
| WBSCR27|80036|ES | 0.025483 | 1.017801 | 0.261997 | 3.953929 | 0.97967 |
| C19orf12|48857|ES | 0.024831 | 1.027058 | 0.124849 | 8.449011 | 0.98019 |
| ADAMTS2|74892|AT | 0.024467 | 1.008857 | 0.497787 | 2.044636 | 0.98048 |
| ADAMTS2|74891|AT | -0.02446 | 0.991223 | 0.489086 | 2.008897 | 0.980486 |
| KIAA1432|85794|AT | -0.02437 | 0.97213 | 0.100065 | 9.44426 | 0.980561 |
| PDPR|37329|AP | -0.02402 | 0.991344 | 0.487645 | 2.015325 | 0.98084 |
| C12orf76|24408|ES | -0.02331 | 0.988411 | 0.370916 | 2.633904 | 0.981404 |
| ST3GAL6|65790|AP | 0.023215 | 1.013086 | 0.33803 | 3.036249 | 0.981479 |
| PCMTD1|83807|AT | 0.023181 | 1.035627 | 0.053676 | 19.98153 | 0.981506 |
| PRKACB|3585|AP | -0.02302 | 0.993393 | 0.564939 | 1.74679 | 0.981635 |
| COQ2|69776|AT | 0.022467 | 1.035067 | 0.051187 | 20.93032 | 0.982075 |
| RUNX2|76399|AP | 0.022291 | 1.004803 | 0.659363 | 1.531219 | 0.982216 |
| IQCK|93917|ES | 0.021986 | 1.010988 | 0.381657 | 2.678052 | 0.982459 |
| NRBP2|85507|RI | 0.021726 | 1.008429 | 0.472922 | 2.150313 | 0.982666 |
| CCDC88C|28877|AT | 0.021537 | 1.030856 | 0.064878 | 16.37938 | 0.982817 |
| TNFSF13|38970|AP | 0.021497 | 1.014608 | 0.270425 | 3.806717 | 0.982849 |
| HYDIN|37416|AT | 0.021438 | 1.005874 | 0.588858 | 1.71821 | 0.982896 |
| BBX|66009|ES | -0.01986 | 0.989872 | 0.362483 | 2.703151 | 0.984154 |
| CCDC43|41881|ES | -0.01982 | 0.967646 | 0.037416 | 25.02491 | 0.984189 |
| MRPS5|54487|ES | 0.018817 | 1.10872 | 2.38E-05 | 51695.97 | 0.984987 |
| EIF4E3|65609|AP | -0.0188 | 0.991598 | 0.411395 | 2.390077 | 0.985003 |
| MYO5A|30661|ES | 0.018326 | 1.006807 | 0.487381 | 2.079809 | 0.985379 |
| MRPS12|49738|AD | -0.01796 | 0.983702 | 0.163651 | 5.912996 | 0.985674 |
| C6orf89|75996|ES | -0.01792 | 0.988571 | 0.281139 | 3.476111 | 0.985704 |
| ARHGAP23|40578|ES | 0.017174 | 1.016978 | 0.148898 | 6.946003 | 0.986298 |
| GNB2L1|264680|ES | 0.017127 | 1.024111 | 0.06703 | 15.64677 | 0.986335 |
| GAREML|52884|RI | 0.017074 | 1.022037 | 0.083709 | 12.4785 | 0.986378 |
| BEAN1|36710|AT | 0.016551 | 1.006875 | 0.447329 | 2.266334 | 0.986795 |
| RWDD1|77328|ES | -0.01609 | 0.989881 | 0.28669 | 3.417856 | 0.987165 |
| FLNA|90565|ES | -0.01592 | 0.988992 | 0.253107 | 3.864391 | 0.9873 |
| CLDN6|33344|RI | 0.015861 | 1.037783 | 0.010613 | 101.4772 | 0.987345 |
| IRF5|81726|AP | -0.01579 | 0.990962 | 0.320965 | 3.059535 | 0.987406 |
| MFSD10|100323|ES | 0.013886 | 1.005862 | 0.440795 | 2.295305 | 0.988921 |
| TTC13|10259|ES | -0.01362 | 0.993467 | 0.386979 | 2.550469 | 0.98913 |
| PCLO|80261|AT | -0.0126 | 0.995928 | 0.52786 | 1.879046 | 0.989949 |
| UBXN2A|52795|AP | -0.01253 | 0.994768 | 0.437793 | 2.260344 | 0.990005 |
| KIAA1328|45284|AT | -0.01248 | 0.986257 | 0.11217 | 8.671681 | 0.990046 |
| UBXN2A|52794|AP | 0.012432 | 1.005219 | 0.442393 | 2.28409 | 0.990081 |
| LAT2|80064|AT | 0.011145 | 1.017731 | 0.046269 | 22.38585 | 0.991108 |
| FES|32501|ES | 0.010855 | 1.007732 | 0.250851 | 4.048311 | 0.991339 |
| EVC2|68691|AP | -0.01077 | 0.992547 | 0.254405 | 3.872374 | 0.991407 |
| PAM16|33648|AP | 0.010685 | 1.006364 | 0.314336 | 3.221924 | 0.991475 |
| UBE2D4|79369|AT | -0.01062 | 0.990704 | 0.176641 | 5.556436 | 0.99153 |
| UBE2D4|79371|AT | 0.010616 | 1.009383 | 0.179971 | 5.661197 | 0.99153 |
| FLNB|65418|ES | -0.01059 | 0.995494 | 0.431659 | 2.295814 | 0.991549 |
| SENP7|65948|ES | -0.00921 | 0.994941 | 0.338025 | 2.928505 | 0.992653 |
| ZSCAN9|75720|AT | 0.009087 | 1.007267 | 0.21128 | 4.8021 | 0.99275 |
| ZSCAN9|75721|AT | -0.00904 | 0.99282 | 0.208249 | 4.733224 | 0.992785 |
| NIPA2|29683|ES | -0.00893 | 0.995051 | 0.335064 | 2.95503 | 0.992871 |
| C9orf117|87644|AT | -0.0088 | 0.994878 | 0.316761 | 3.124692 | 0.992983 |
| CSAD|21957|ES | 0.008611 | 1.017916 | 0.017879 | 57.95454 | 0.99313 |
| FBXL8|36932|RI | -0.00843 | 0.996147 | 0.406215 | 2.442817 | 0.993271 |
| APIP|14964|AP | -0.00842 | 0.995682 | 0.363682 | 2.725962 | 0.99328 |
| SREBF1|39507|ES | -0.00822 | 0.996908 | 0.476316 | 2.08648 | 0.993442 |
| FBXO18|10670|AP | 0.007705 | 1.005895 | 0.225505 | 4.486932 | 0.993853 |
| SERBP1|3354|AA | -0.00691 | 0.991689 | 0.093033 | 10.57091 | 0.994485 |
| KIAA1217|11002|ES | -0.00663 | 0.994971 | 0.224301 | 4.413571 | 0.994708 |
| ZNF655|80659|AP | -0.00507 | 0.996686 | 0.276198 | 3.596635 | 0.995955 |
| ZNF655|80660|AP | 0.00507 | 1.003325 | 0.278038 | 3.620593 | 0.995955 |
| TMEM177|55136|AT | 0.004828 | 1.005764 | 0.097526 | 10.37222 | 0.996148 |
| ATXN7|65518|ES | -0.00483 | 0.997814 | 0.410294 | 2.426634 | 0.996149 |
| COL1A1|265896|ES | 0.004634 | 1.00364 | 0.215888 | 4.665813 | 0.996302 |
| NAV1|9388|AP | -0.00446 | 0.998309 | 0.474336 | 2.101085 | 0.996444 |
| RBM38|59895|AP | -0.00437 | 0.973838 | 6.74E-06 | 140645.8 | 0.996511 |
| RASSF1|65018|AP | -0.00367 | 0.997403 | 0.248429 | 4.004411 | 0.997074 |
| TAGLN|18894|AP | 0.003462 | 1.006383 | 0.027434 | 36.91802 | 0.997238 |
| RANGRF|39167|ES | -0.00316 | 0.995821 | 0.07387 | 13.4244 | 0.997483 |
| TBC1D13|87784|ES | -0.00306 | 0.99857 | 0.399224 | 2.497703 | 0.99756 |
| RGS12|68642|AT | -0.00254 | 0.998743 | 0.378633 | 2.634444 | 0.997972 |
| RGS12|68639|AT | 0.002457 | 1.001217 | 0.37957 | 2.640973 | 0.99804 |
| SIN3B|48212|AP | 0.002223 | 1.001014 | 0.409624 | 2.446216 | 0.998226 |
| SIN3B|48213|AP | -0.00222 | 0.99899 | 0.408796 | 2.441271 | 0.998232 |
| CHORDC1|18260|AP | -0.00205 | 0.998479 | 0.232564 | 4.286822 | 0.998367 |
| C9orf117|87643|AT | 0.00201 | 1.001175 | 0.318527 | 3.14683 | 0.998396 |
| DNAJC25|87230|ES | -0.00162 | 0.999375 | 0.469406 | 2.127689 | 0.998706 |
| ZFYVE19|30050|ES | 0.000909 | 1.000457 | 0.373358 | 2.680846 | 0.999275 |
| AFMID|43841|ES | 0.000728 | 1.000274 | 0.47793 | 2.093506 | 0.999419 |
| FARP1|26165|AT | 0.000644 | 1.00156 | 0.00875 | 114.6462 | 0.999486 |
| ANGEL2|9775|AP | -0.00061 | 0.999696 | 0.375782 | 2.659499 | 0.999515 |
| MS4A4A|16081|ES | 0.000595 | 1.000913 | 0.049561 | 20.21409 | 0.999525 |
| ANGEL2|9776|AP | 0.000583 | 1.000291 | 0.376004 | 2.661094 | 0.999535 |
| AGBL2|15792|AT | -0.00034 | 0.999877 | 0.497348 | 2.010169 | 0.999725 |
